# Supplementary material for: Non-palindromic (C^C^D) gold(iii) pincer complexes are not accessible by intramolecular oxidative addition of biphenylenes – an experimental and quantum chemical study
Source: Royal Society of Chemistry journal article supplement (doi:10.1039/d1dt00953b), 2021-01-01
Supplement: d1dt00953b1.pdf [file d1dt00953b1.pdf]

# Non-palindromic (C<sup>^</sup>C<sup>^</sup>D) Gold(III) Pincer Complexes are Not Accessible by Intramolecular Oxidative Addition of Biphenylenes – An Experimental and Quantum Chemical Study

Wolfram Feuerstein [ID<sup>a</sup>](#) and Frank Breher [\\*ID<sup>a</sup>](#)

<sup>a</sup> Dr. W. Feuerstein, Prof. Dr. F. Breher  
Institute of Inorganic Chemistry  
Division Molecular Chemistry  
Karlsruhe Institute of Technology (KIT)  
Engesserstr. 15  
76131 Karlsruhe, Germany  
E-mail: breher@kit.edu

## Contents

|      |                                                                |    |
|------|----------------------------------------------------------------|----|
| S 1. | Oxidative Addition of Biphenylene to [(IPr)Au(I)] <sup>+</sup> | 2  |
| S 2. | Additional Solid State Structure                               | 2  |
| S 3. | Crystallographic Details                                       | 3  |
| S 4. | NMR spectra                                                    | 5  |
| S 5. | Coordinates of Quantum Chemical Calculations                   | 15 |

## S 1. Oxidative Addition of Biphenylene to [(IPr)Au(I)]<sup>+</sup>

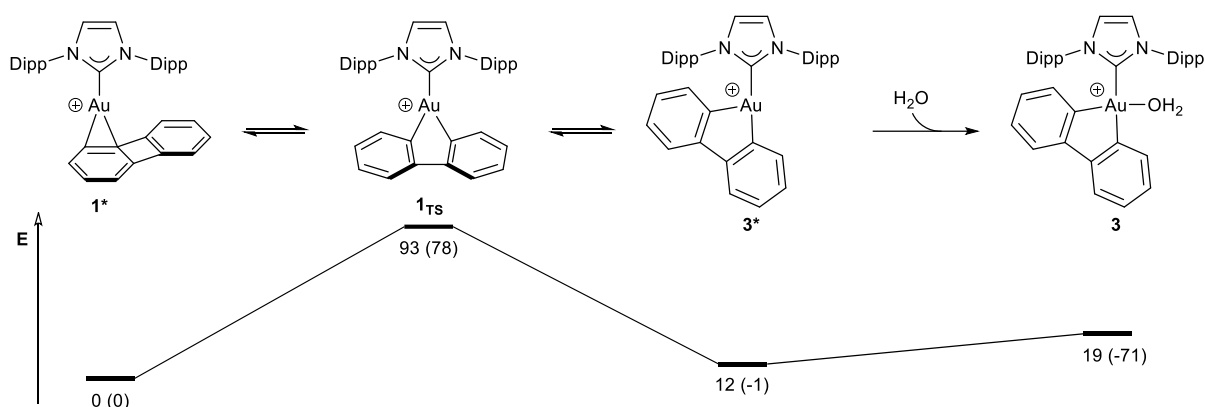

Oxidative addition of biphenylene (**2**) to [(IPr)Au(I)]<sup>+</sup> (**1\***) calculated on the RI-TPSSH-D3(BJ)/def2-TZVPP level of theory neglecting the [SbF<sub>6</sub>]<sup>-</sup> anion. Gibbs free energies (electronic energies in parentheses) are given in kJ mol<sup>-1</sup> relative to the reactant complex **1\***. Solvent effects of CH<sub>2</sub>Cl<sub>2</sub> were only considered by single point calculations of gas phase optimized structures by means of the SMD model. Obviously, the incorporation of anion and solvent effects for structure optimizations and not only by means of single point calculations has a large impact on the theoretically predicted reaction outcome. The huge discrepancy between Gibbs free energy and electronic energy upon water coordination underlines the need to include the anion as well as solvent effects for the structure optimizations.

Gibbs free energies (electronic energies) obtained using other functionals are listed in the following table. Again, solvent effects were included by single point calculations of gas phase optimized structures only by means of the SMD model.

| Species               | Main text <sup>a</sup> | TPSSH    | B97D3     | BP86     | PBE      | TPSS     | TPSSH/<br>B2PLYP <sup>b</sup> | B97D3/<br>B2PLYP <sup>b</sup> | BP86/<br>B2PLYP <sup>b</sup> | PBE/<br>B2PLYP <sup>b</sup> | TPSS/<br>B2PLYP <sup>b</sup> |
|-----------------------|------------------------|----------|-----------|----------|----------|----------|-------------------------------|-------------------------------|------------------------------|-----------------------------|------------------------------|
| <b>1<sub>TS</sub></b> | 88 (82)                | 93 (78)  | 73 (74)   | 79 (70)  | 70 (72)  | 78 (72)  | 93 (79)                       | 78 (78)                       | 87 (78)                      | 76 (79)                     | 85 (79)                      |
| <b>3*</b>             | 10 (-2)                | 12 (-1)  | -12 (-10) | 3 (-11)  | -1 (-6)  | -5 (-10) | 11 (-2)                       | -5 (-2)                       | 11 (-3)                      | 3 (-2)                      | 3 (-2)                       |
| <b>3</b>              | -37 (-79)              | 19 (-71) | 8 (-67)   | 11 (-80) | 11 (-74) | 4 (-79)  | 22 (-68)                      | 8 (-68)                       | 22 (-69)                     | 17 (-68)                    | 15 (-68)                     |

<sup>a</sup> Energies reported in the main text, i.e. calculations on the RIJCOSX-TPSSH-D3(BJ)/def2-TZVPP level of theory including [SbF<sub>6</sub>]<sup>-</sup> anion and solvent effects (C-PCM) for structure optimizations as well. <sup>b</sup> Electronic energies obtained on the RI-B2PLYP-D3(BJ)/def2-TZVPP level of theory by single point calculations using the structures obtained applying the indicated functional.

## S 2. Additional Solid State Structure

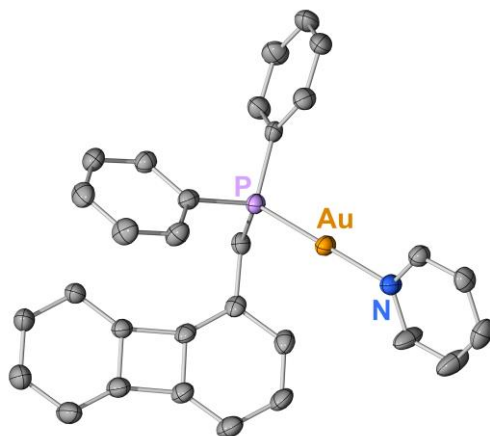

**Figure S 1.** Molecular structure of **S1** in the solid state. **S1** forms upon chloride abstraction of **19** using Ag[SbF<sub>6</sub>] in CH<sub>2</sub>Cl<sub>2</sub> in the presence of pyridine. Crystals were grown by layering a solution of **S1** in CH<sub>2</sub>Cl<sub>2</sub> with *n*-hexane. Thermal ellipsoids are drawn at the 30% probability level. Hydrogen atoms and the SbF<sub>6</sub><sup>-</sup> anion are omitted for clarity. Selected bond lengths (pm) and angles (°): P–Au 224.0(1), Au–N 206.9(5).

## S 3. Crystallographic Details

| Compound                                      | 11                                   | 19                                    | S1                                                    |
|-----------------------------------------------|--------------------------------------|---------------------------------------|-------------------------------------------------------|
| Empirical Formula                             | C <sub>12</sub> H <sub>7</sub> Br    | C <sub>25</sub> H <sub>19</sub> AuCIP | C <sub>30</sub> H <sub>24</sub> AuF <sub>6</sub> NPSb |
| <i>M</i>                                      | 231.09                               | 582.822                               | 862.19                                                |
| Temperature / K                               | 200                                  | 200                                   | 200                                                   |
| Crystal system                                | monoclinic                           | triclinic                             | orthorhombic                                          |
| Space group                                   | P2 <sub>1</sub> /n                   | P-1                                   | Pbca                                                  |
| <i>a</i> / Å                                  | 11.984(2)                            | 8.4150(17)                            | 16.301(3)                                             |
| <i>b</i> / Å                                  | 11.811(2)                            | 11.176(2)                             | 17.737(4)                                             |
| <i>c</i> / Å                                  | 14.110(3)                            | 12.451(3)                             | 20.159(4)                                             |
| $\alpha$ / °                                  | 90                                   | 109.57(3)                             | 90                                                    |
| $\beta$ / °                                   | 110.81(3)                            | 106.82(3)                             | 90                                                    |
| $\gamma$ / °                                  | 90                                   | 93.89(3)                              | 90                                                    |
| <i>V</i> / Å <sup>3</sup>                     | 1866.9(7)                            | 1038.4(5)                             | 5829(2)                                               |
| <i>Z</i>                                      | 8                                    | 2                                     | 8                                                     |
| $\rho_{\text{calc}}$ g/cm <sup>3</sup>        | 1.644                                | 1.864                                 | 1.965                                                 |
| $\mu$ / mm <sup>-1</sup>                      | 4.346                                | 7.298                                 | 6.069                                                 |
| Crystal size / mm <sup>3</sup>                | 0.4 × 0.35 × 0.35                    | 0.4 × 0.3 × 0.3                       | 0.2 × 0.2 × 0.2                                       |
| Radiation                                     | Mo K $\alpha$ ( $\lambda$ = 0.71073) | Mo K $\alpha$ ( $\lambda$ = 0.71073)  | Mo K $\alpha$ ( $\lambda$ = 0.71073)                  |
| $2\theta_{\text{min}}$ / °                    | 3.844                                | 3.68                                  | 3.95                                                  |
| $2\theta_{\text{max}}$ / °                    | 56.558                               | 54                                    | 50.694                                                |
| Reflections collected                         | 17619                                | 12924                                 | 75062                                                 |
| Independent Reflections                       | 4641 ( $R_{\text{int}}$ = 0.0522)    | 4525 ( $R_{\text{int}}$ = 0.0309)     | 5334 ( $R_{\text{int}}$ = 0.1100)                     |
| Data/restraints/parameters                    | 4641/0/235                           | 4525/0/253                            | 5334/0/361                                            |
| GooF on F <sup>2</sup>                        | 1.036                                | 1.045                                 | 1.111                                                 |
| $R_1$ [ $I \geq 2\sigma(I)$ ]                 | 0.0355                               | 0.0201                                | 0.0389                                                |
| $wR_2$ [ $I \geq 2\sigma(I)$ ]                | 0.0823                               | 0.0486                                | 0.1010                                                |
| $R_1$ (all data)                              | 0.0534                               | 0.0221                                | 0.0446                                                |
| $wR_2$ (all data)                             | 0.0938                               | 0.0499                                | 0.1053                                                |
| Largest diff. peak/holes / e · Å <sup>3</sup> | 0.53 / -0.99                         | 0.75 / -0.97                          | 1.66 / -3.11                                          |
| Diffractometer                                | Stoe IPDS II                         | Stoe IPDS II                          | Stoe IPDS II                                          |
| CCDC number                                   | <a href="#">2018371</a>              | <a href="#">2018369</a>               | <a href="#">2018372</a>                               |

| Compound                                     | 20                                                 | 23                                                                               |
|----------------------------------------------|----------------------------------------------------|----------------------------------------------------------------------------------|
| Empirical Formula                            | C <sub>17</sub> H <sub>14</sub> AuClN <sub>2</sub> | C <sub>35</sub> H <sub>28</sub> AuF <sub>3</sub> N <sub>4</sub> O <sub>3</sub> S |
| <i>M</i>                                     | 478.733                                            | 838.64                                                                           |
| Temperature / K                              | 200                                                | 200                                                                              |
| Crystal system                               | triclinic                                          | orthorhombic                                                                     |
| Space group                                  | P-1                                                | P2 <sub>1</sub> 2 <sub>1</sub> 2 <sub>1</sub>                                    |
| <i>a</i> / Å                                 | 8.5300(17)                                         | 8.0660(16)                                                                       |
| <i>b</i> / Å                                 | 9.0320(18)                                         | 19.896(4)                                                                        |
| <i>c</i> / Å                                 | 10.772(2)                                          | 20.237(4)                                                                        |
| <i>α</i> / °                                 | 83.91(3)                                           | 90                                                                               |
| <i>β</i> / °                                 | 67.45(3)                                           | 90                                                                               |
| <i>γ</i> / °                                 | 88.61(3)                                           | 90                                                                               |
| <i>V</i> / Å <sup>3</sup>                    | 762.0(3)                                           | 3247.7(11)                                                                       |
| <i>Z</i>                                     | 2                                                  | 4                                                                                |
| $\rho_{\text{calc}}$ g/cm <sup>3</sup>       | 2.086                                              | 1.715                                                                            |
| $\mu$ /mm <sup>-1</sup>                      | 9.822                                              | 4.653                                                                            |
| Crystal size / mm <sup>3</sup>               | 0.4 × 0.3 × 0.3                                    | 0.25 × 0.1 × 0.1                                                                 |
| Radiation                                    | Mo K $\alpha$ ( $\lambda$ = 0.71073)               | Mo K $\alpha$ ( $\lambda$ = 0.71073)                                             |
| $2\theta_{\text{min}}$ / °                   | 4.12                                               | 2.87                                                                             |
| $2\theta_{\text{max}}$ / °                   | 50.7                                               | 56.562                                                                           |
| Reflections collected                        | 10302                                              | 59026                                                                            |
| Independent Reflections                      | 2783 ( $R_{\text{int}}$ = 0.0517)                  | 8060 ( $R_{\text{int}}$ = 0.0948)                                                |
| Data/restraints/parameters                   | 2783/0/191                                         | 8060/0/427                                                                       |
| GooF on F <sup>2</sup>                       | 1.045                                              | 1.194                                                                            |
| $R_1$ [ $I \geq 2\sigma(I)$ ]                | 0.0239                                             | 0.0436                                                                           |
| $wR_2$ [ $I \geq 2\sigma(I)$ ]               | 0.0595                                             | 0.0983                                                                           |
| $R_1$ (all data)                             | 0.0243                                             | 0.0523                                                                           |
| $wR_2$ (all data)                            | 0.0597                                             | 0.1105                                                                           |
| Largest diff. peak/holes /e · Å <sup>3</sup> | 0.71 / -1.66                                       | 1.65 / -1.48                                                                     |
| Diffractometer                               | Stoe IPDS II                                       | Stoe IPDS II                                                                     |
| CCDC number                                  | <a href="#">2018370</a>                            | <a href="#">2018373</a>                                                          |

## S 4. NMR spectra

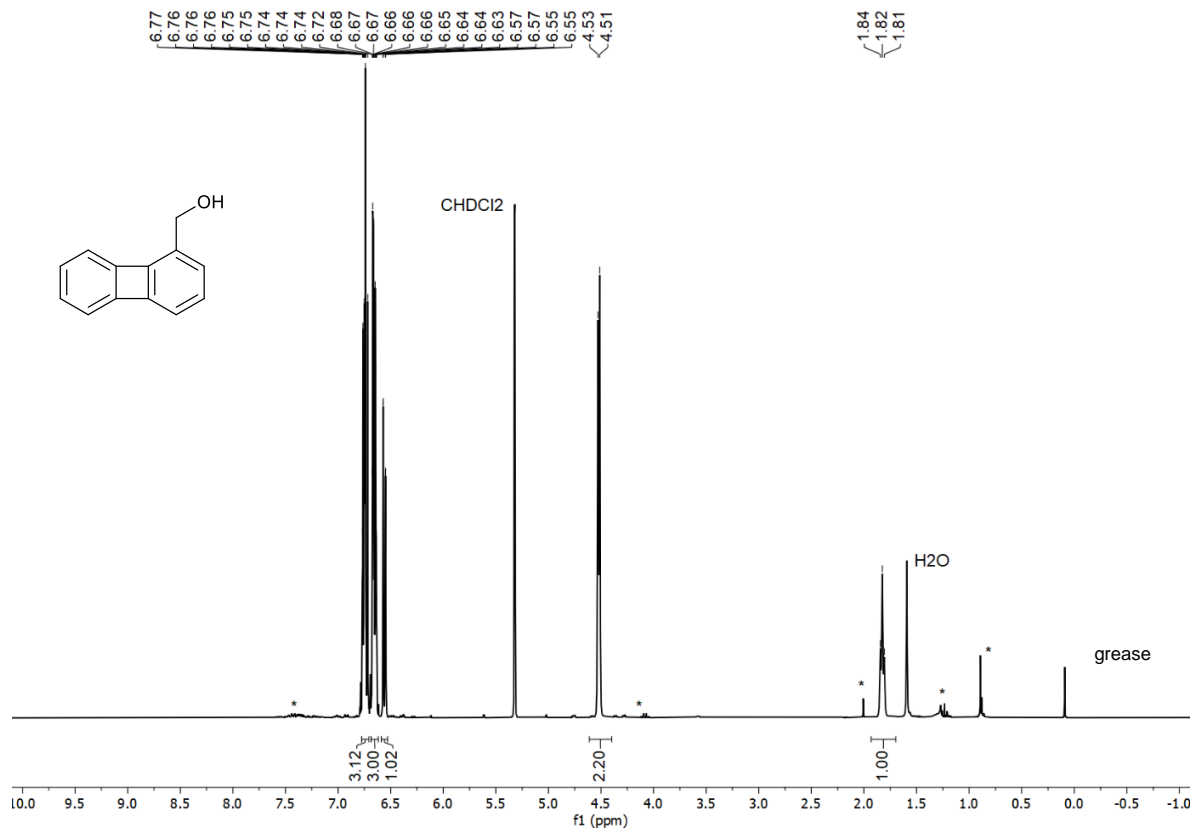

**Figure S 2.** <sup>1</sup>H NMR spectrum (300 MHz, CD<sub>2</sub>Cl<sub>2</sub>) of **13**. Impurities are marked with an asterisk.

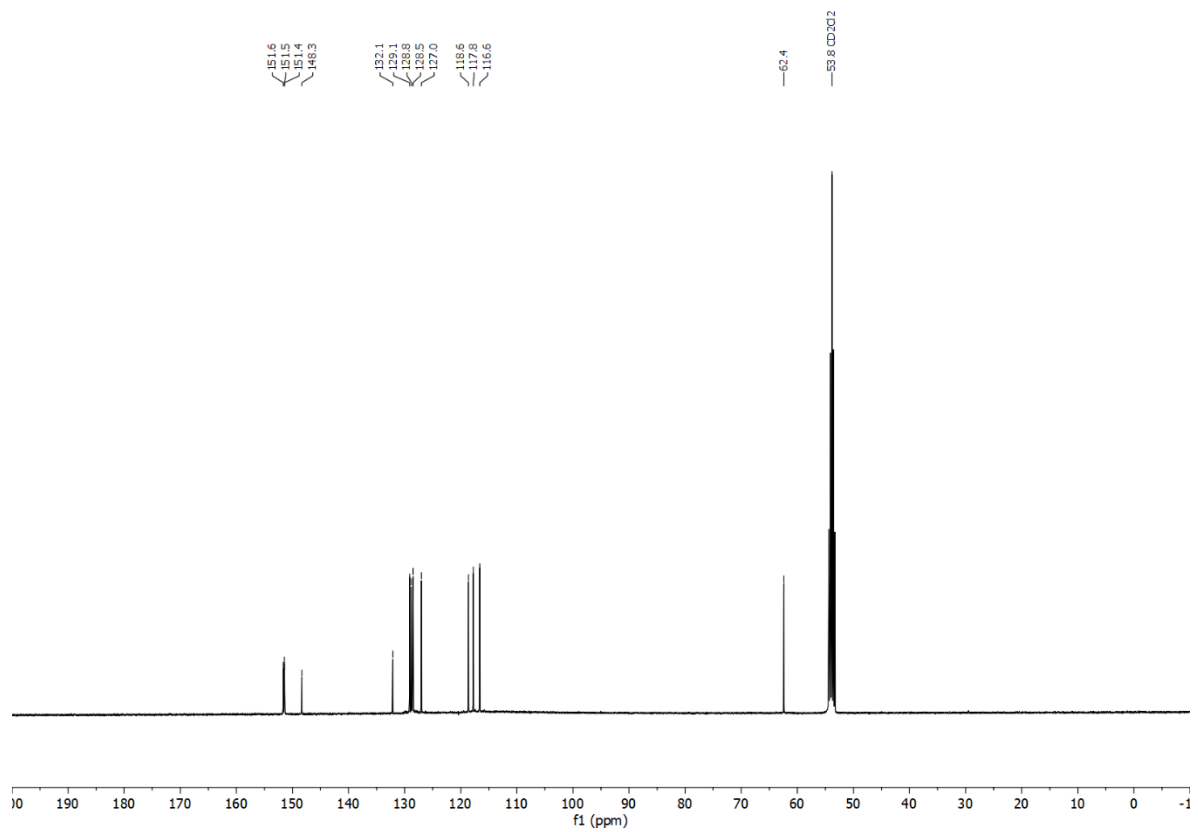

**Figure S 3.** <sup>13</sup>C NMR spectrum (75 MHz, CD<sub>2</sub>Cl<sub>2</sub>) of **13**.

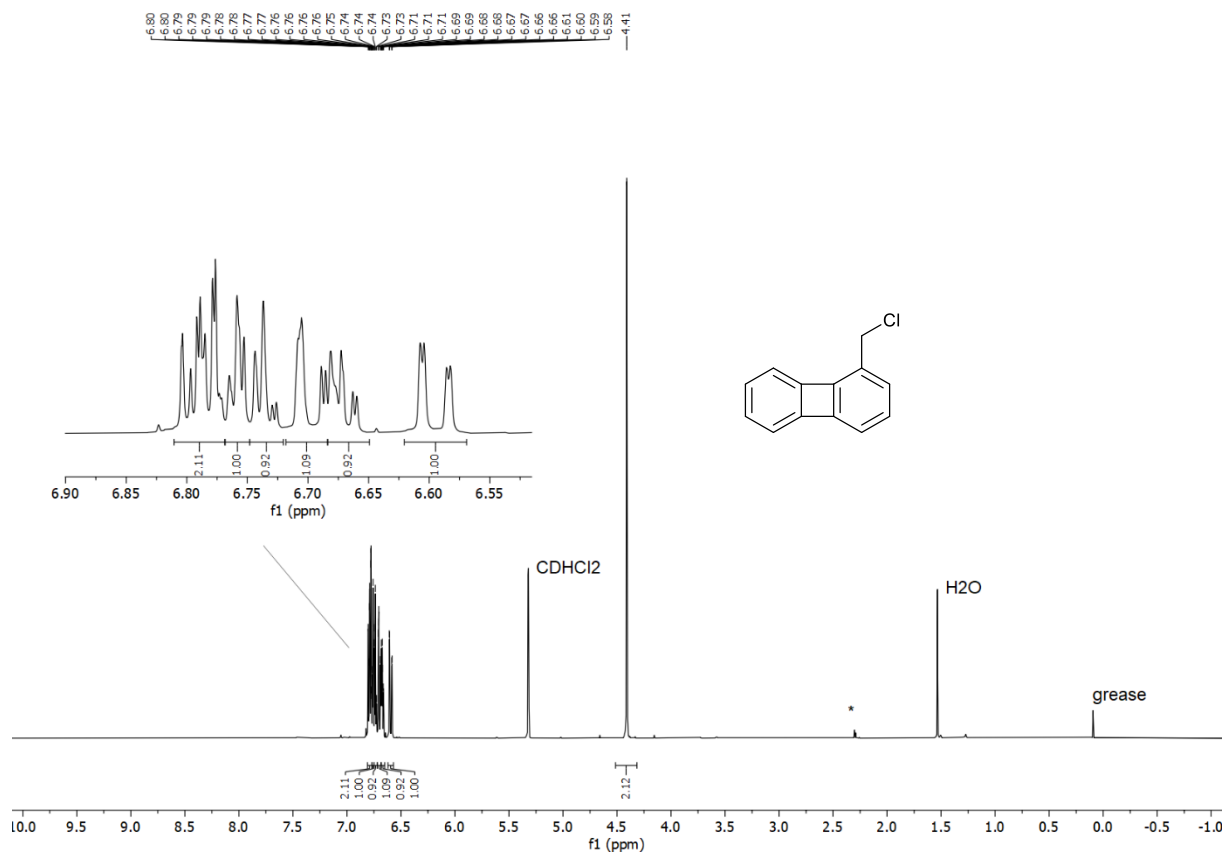

**Figure S 4.** <sup>1</sup>H NMR spectrum (300 MHz, CD<sub>2</sub>Cl<sub>2</sub>) of **14**. Impurities are marked with an asterisk.

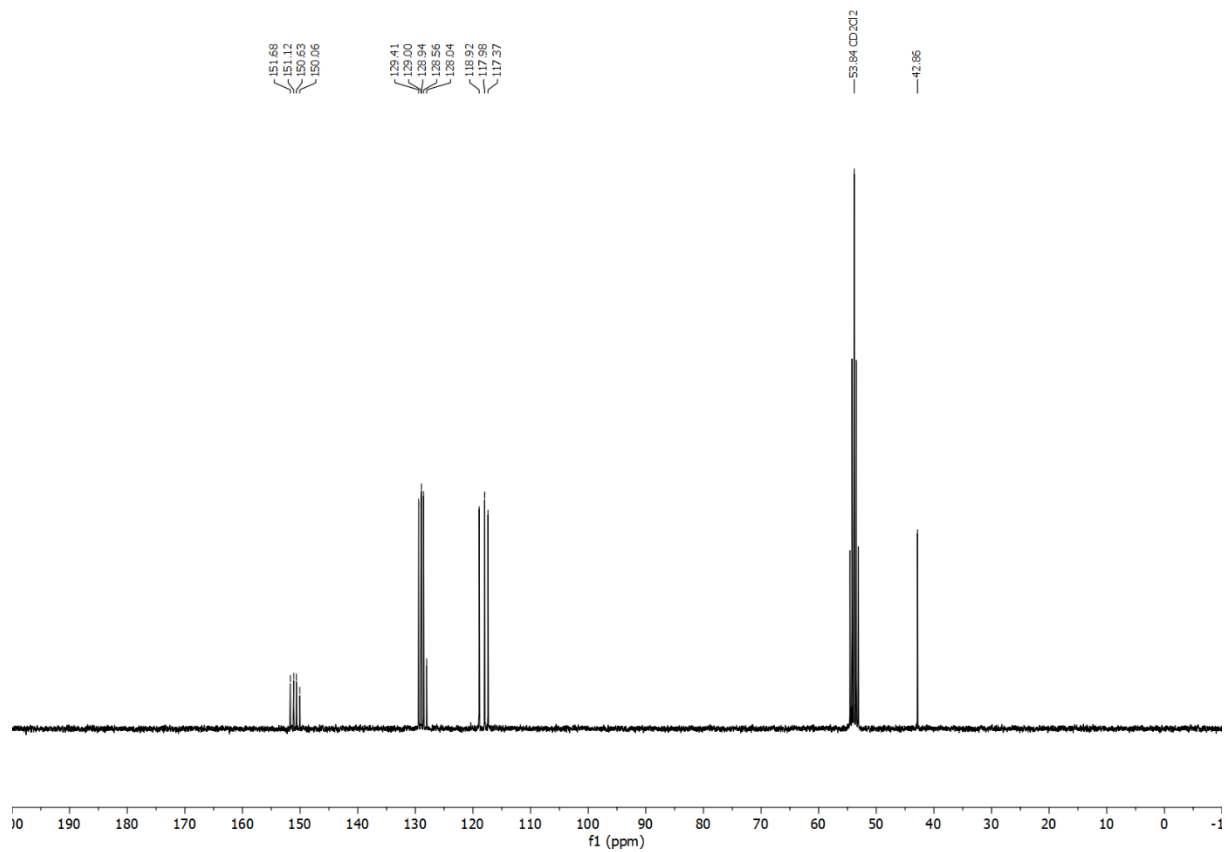

**Figure S 5.** <sup>13</sup>C NMR spectrum (75 MHz, CD<sub>2</sub>Cl<sub>2</sub>) of **14**.

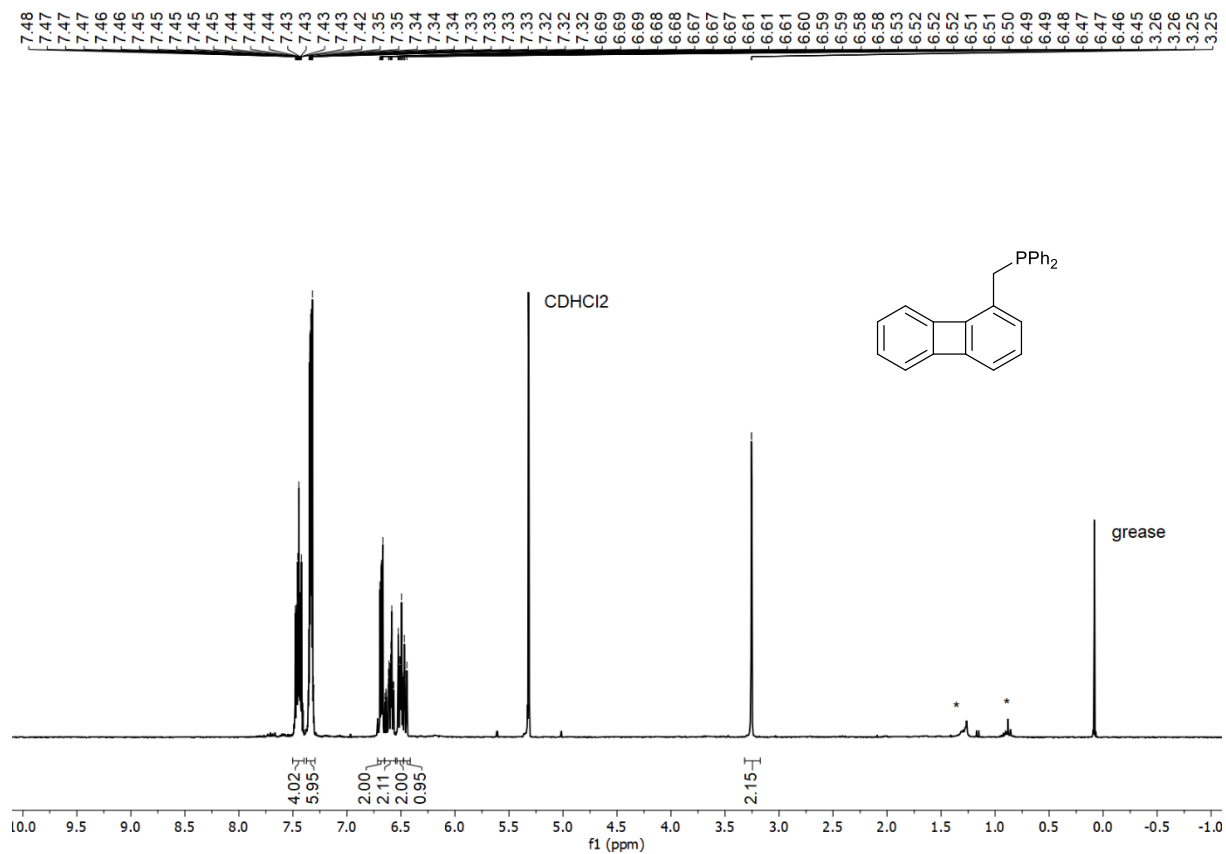

Figure S 6. <sup>1</sup>H NMR spectrum (300 MHz, CD<sub>2</sub>Cl<sub>2</sub>) of **15**. Impurities are marked with an asterisk.

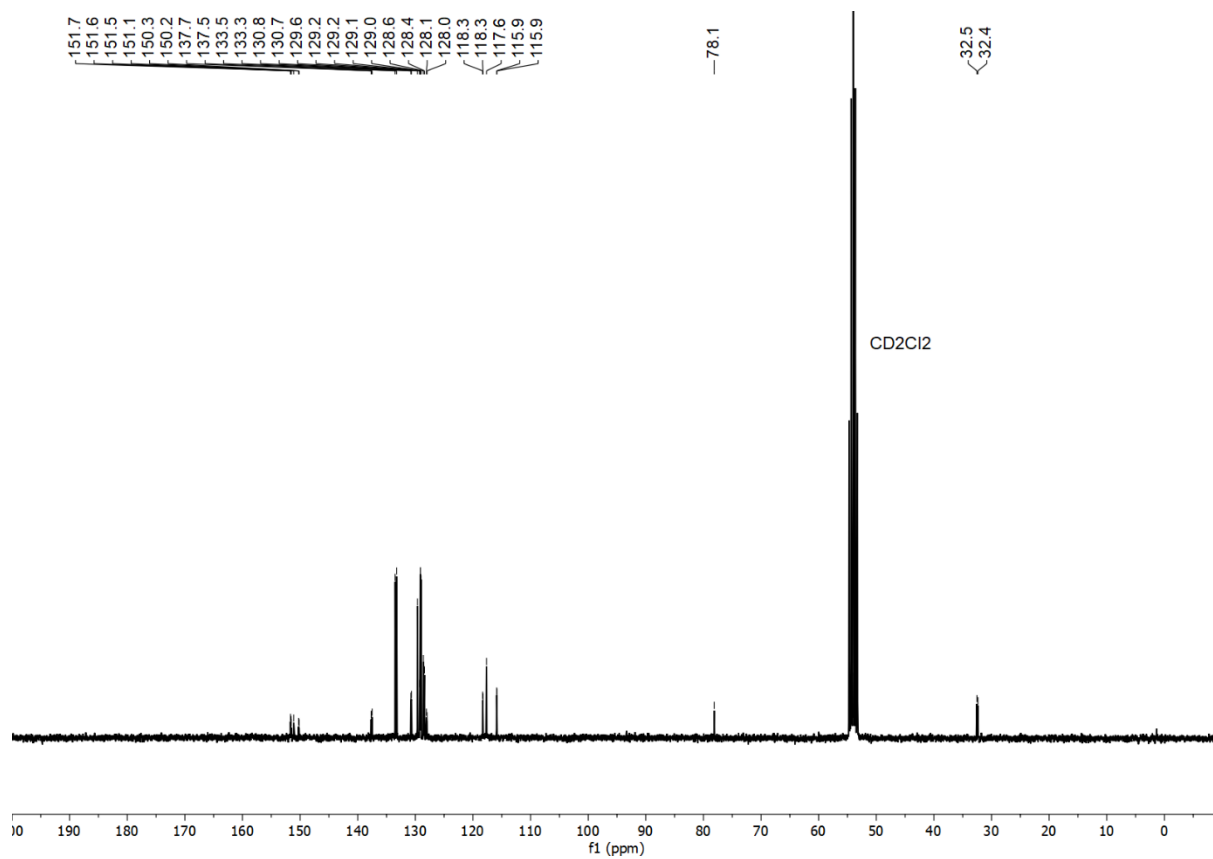

Figure S 7. <sup>13</sup>C NMR spectrum (75 MHz, CD<sub>2</sub>Cl<sub>2</sub>) of **15**.

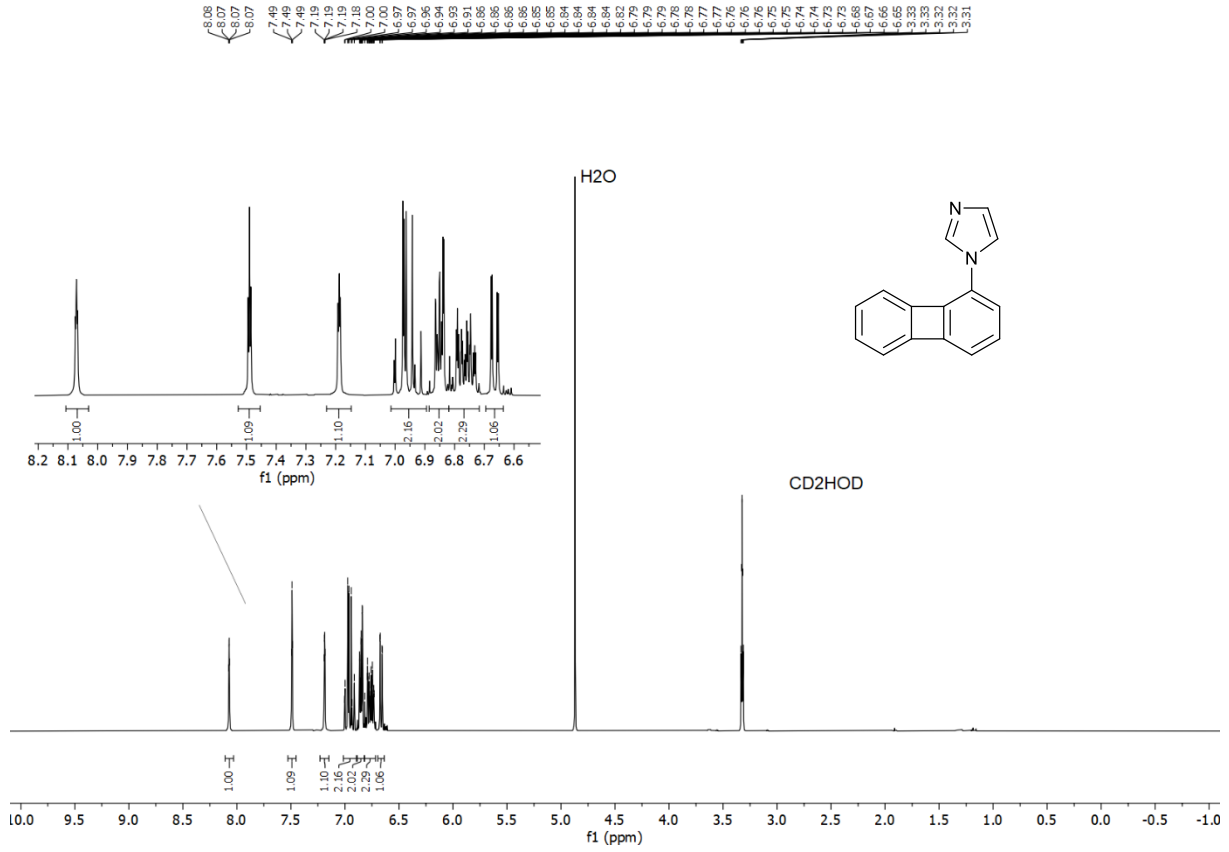

Figure S 8. <sup>1</sup>H NMR spectrum (300 MHz, MeOH-*d*<sub>4</sub>) of 16.

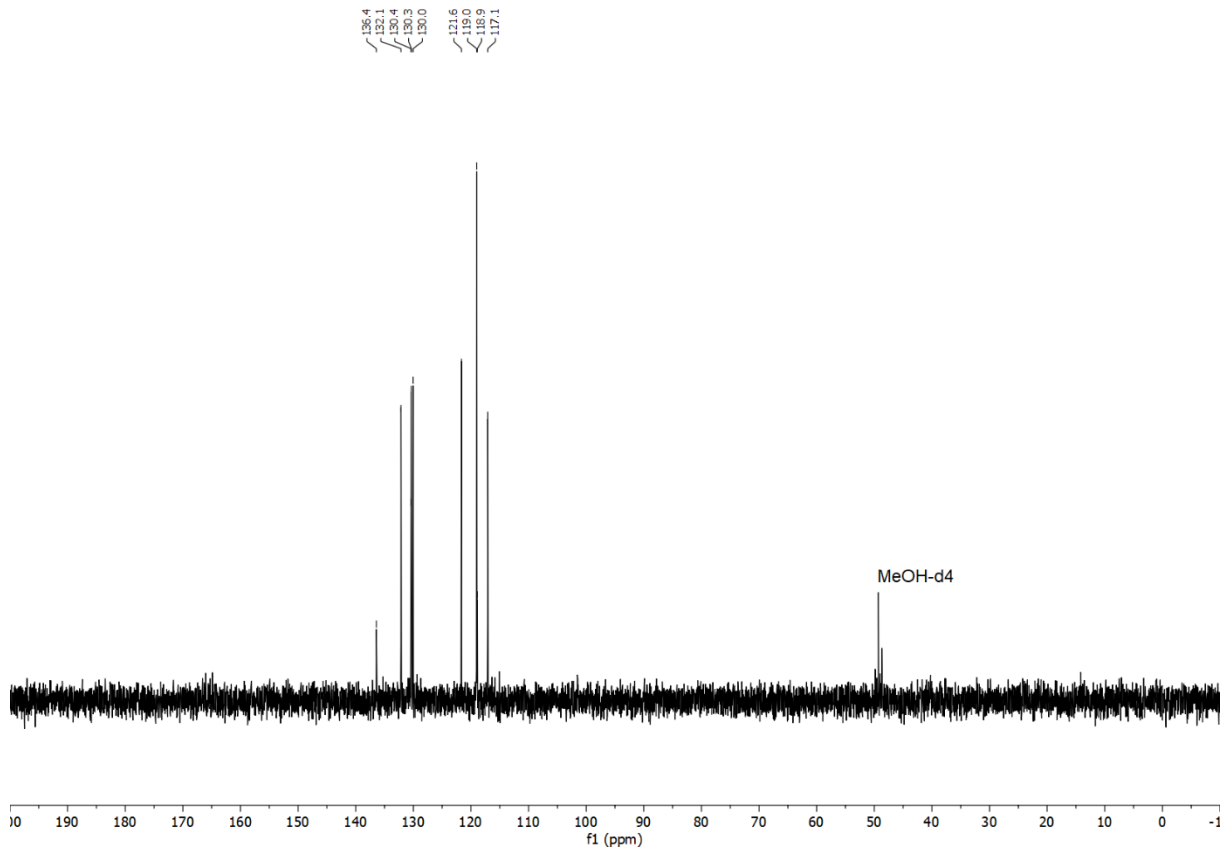

Figure S 9. <sup>13</sup>C NMR spectrum (75 MHz, MeOH-*d*<sub>4</sub>) of 16.



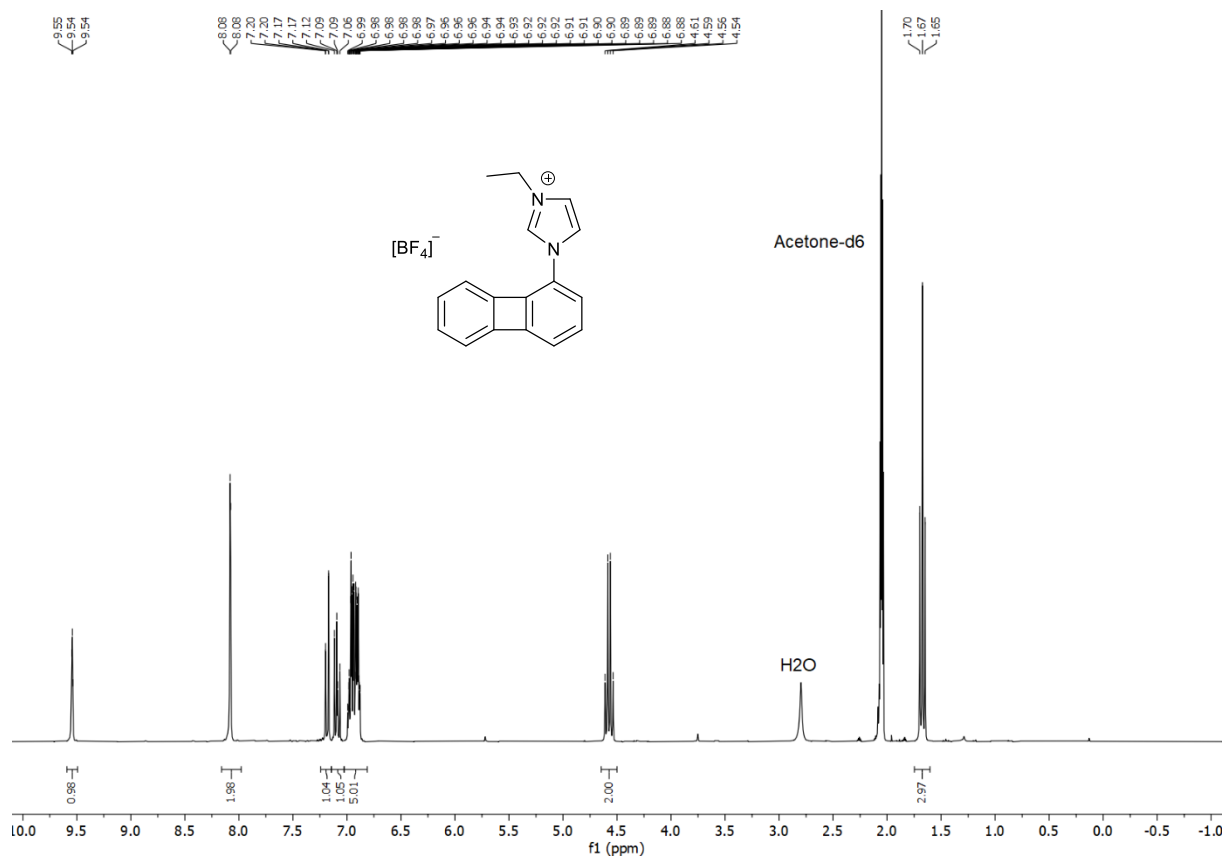

Figure S 10. <sup>1</sup>H NMR spectrum (300 MHz, Acetone-d<sub>6</sub>) of 17a.

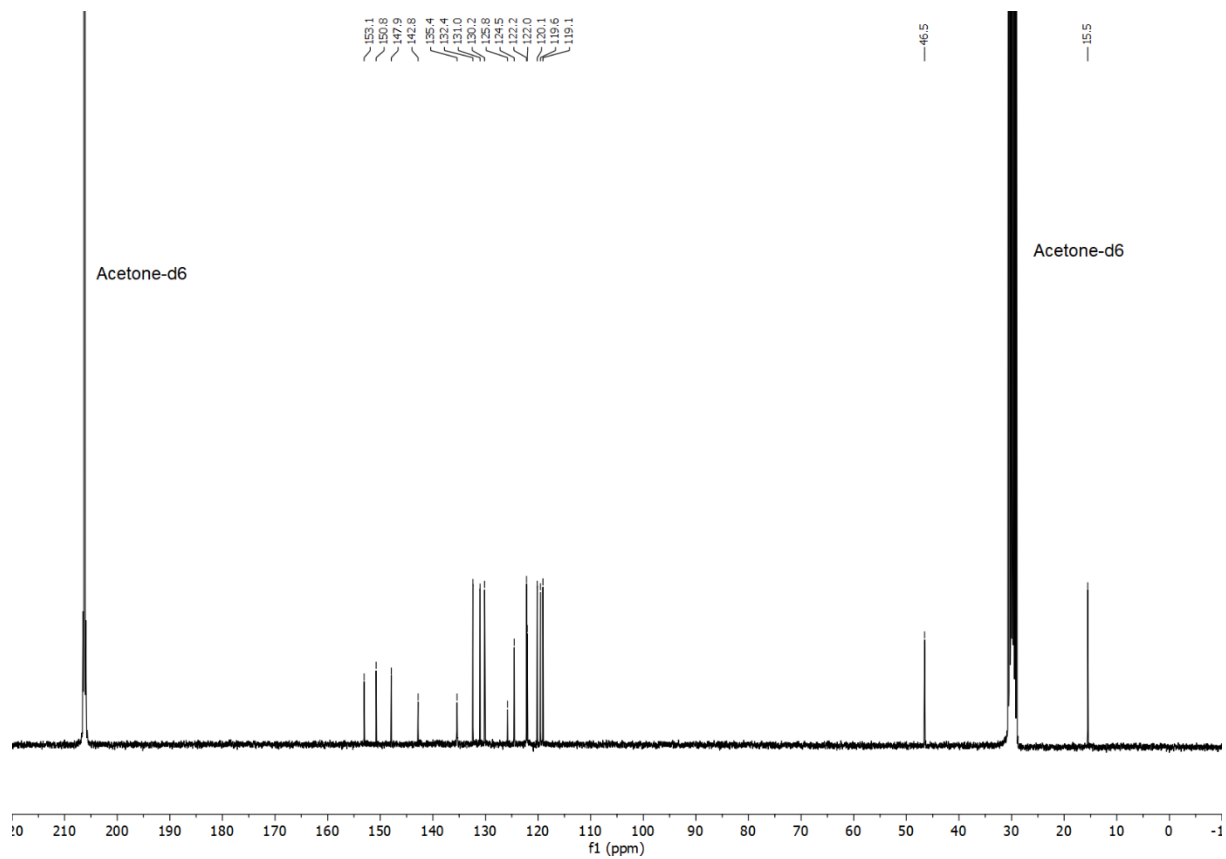

Figure S 11. <sup>13</sup>C NMR spectrum (75 MHz, Acetone-d<sub>6</sub>) of 17a.

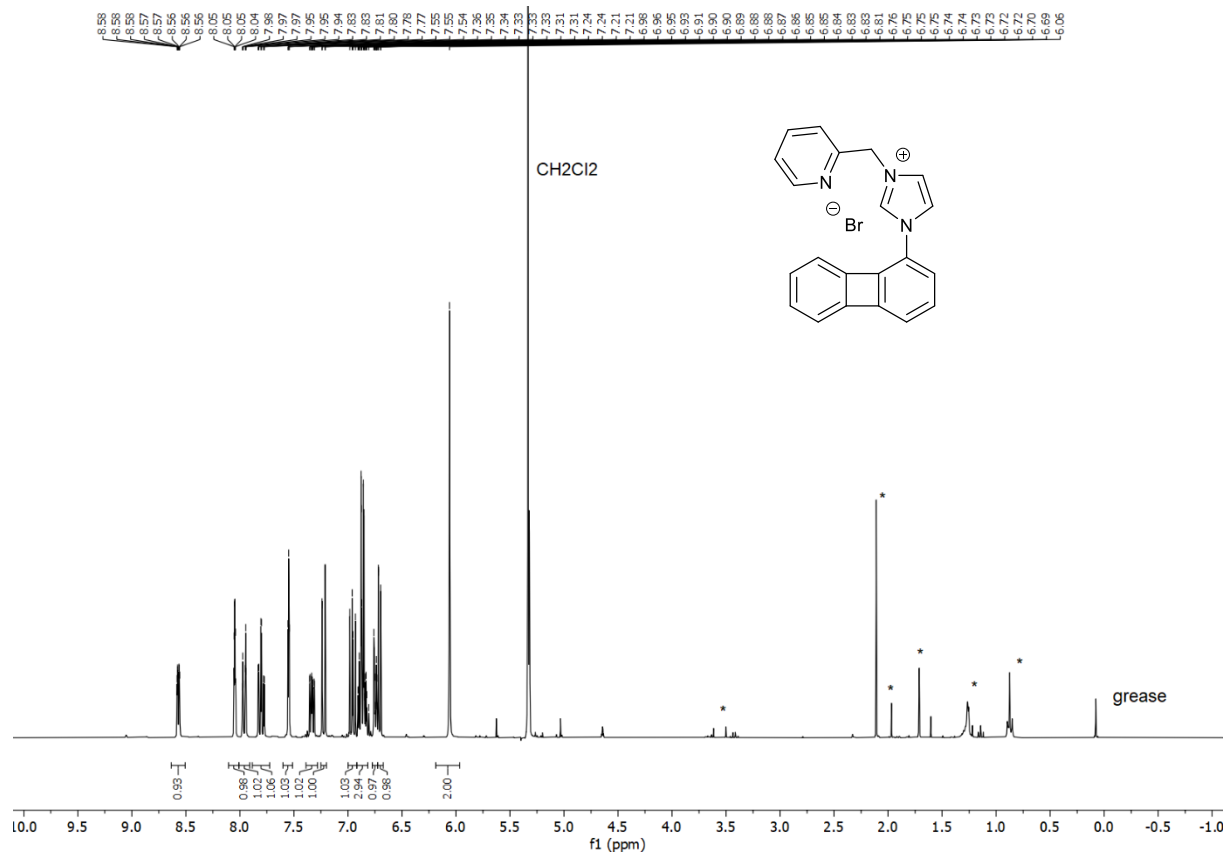

Figure S 12. <sup>1</sup>H NMR spectrum (300 MHz, CD<sub>2</sub>Cl<sub>2</sub>) of **18**. Impurities are marked with an asterisk.

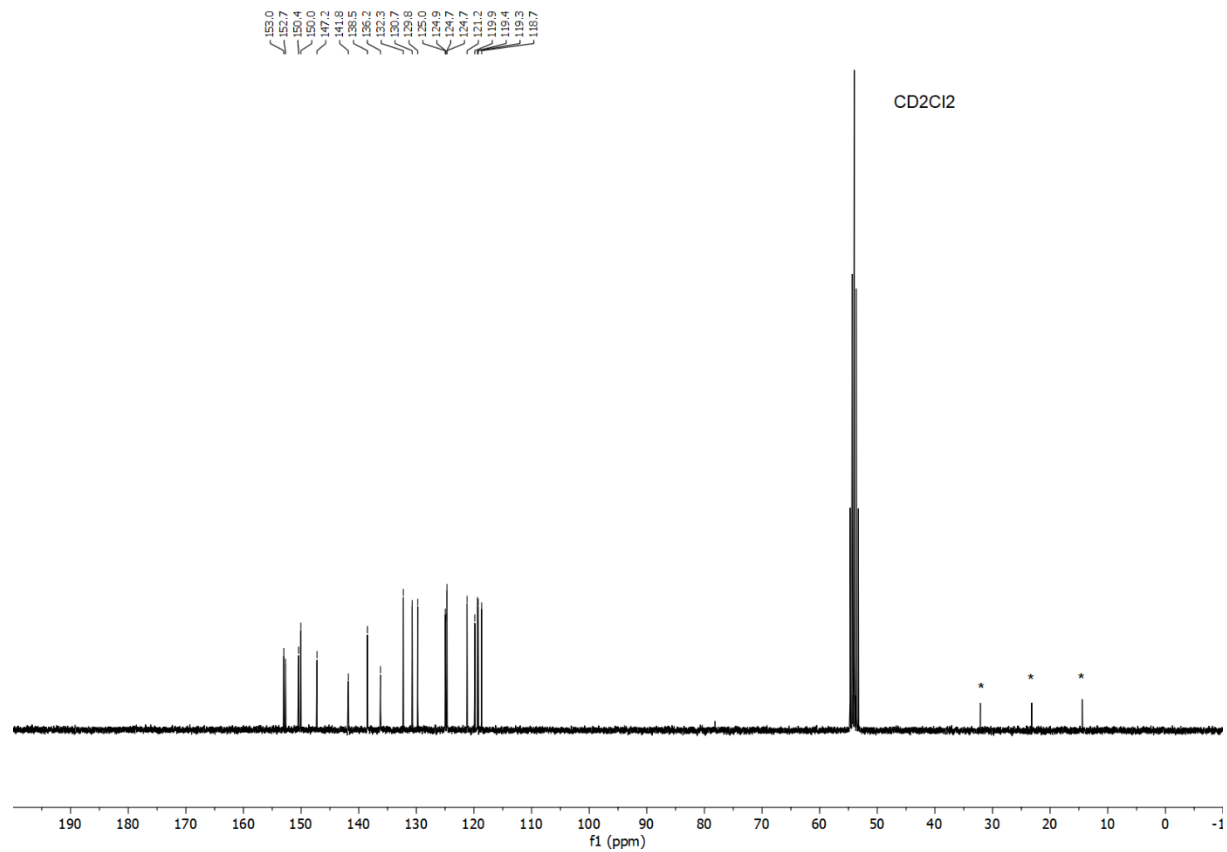

Figure S 13. <sup>13</sup>C NMR spectrum (75 MHz, CD<sub>2</sub>Cl<sub>2</sub>) of **18**. Impurities are marked with an asterisk.

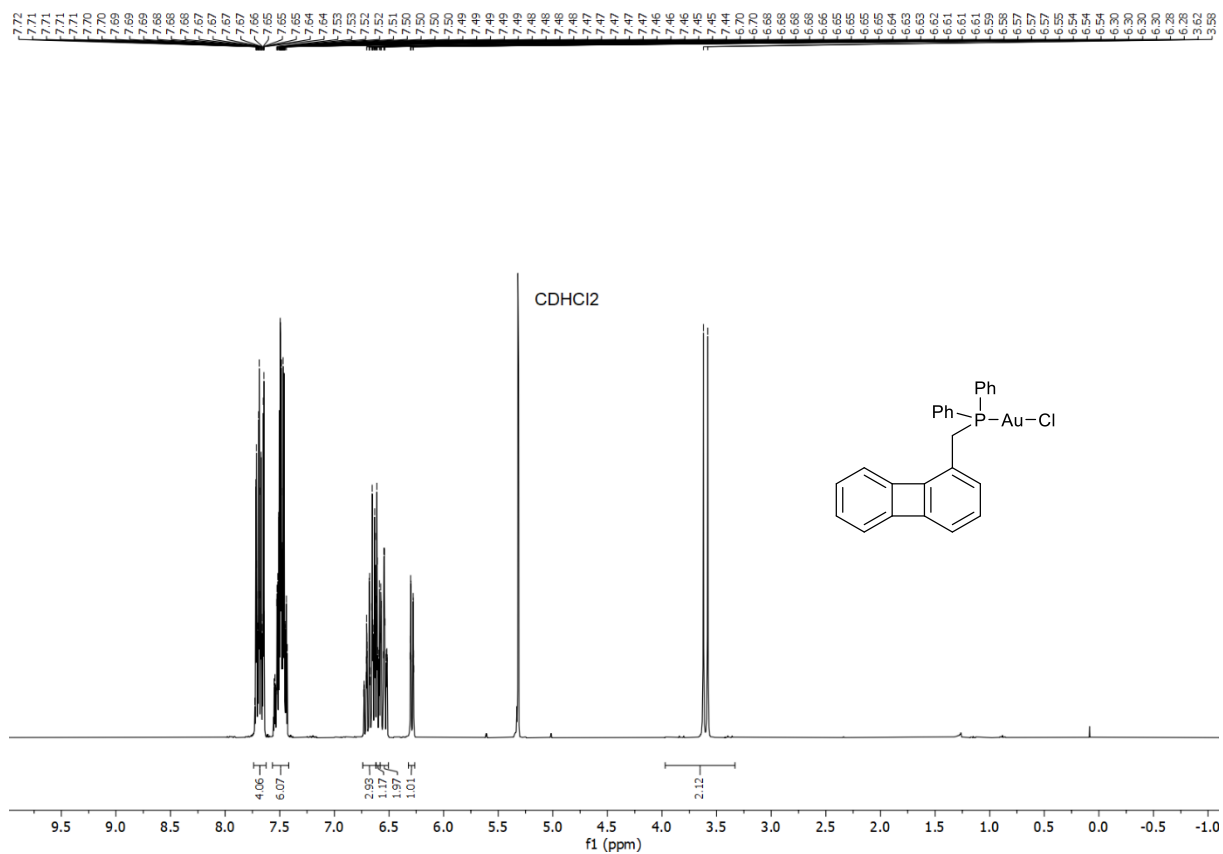

Figure S 14. <sup>1</sup>H NMR spectrum (300 MHz, CD<sub>2</sub>Cl<sub>2</sub>) of 19.

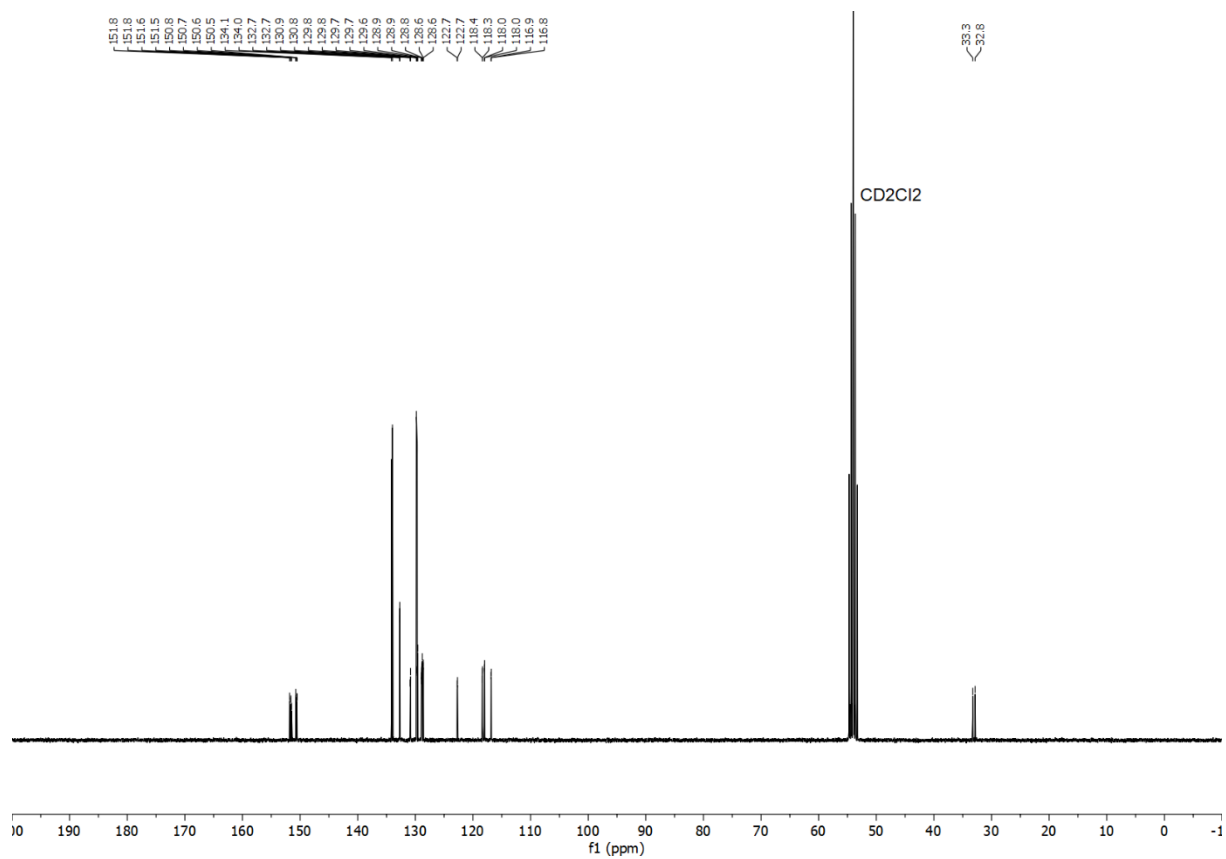

Figure S 15. <sup>13</sup>C NMR spectrum (75 MHz, CD<sub>2</sub>Cl<sub>2</sub>) of 19.

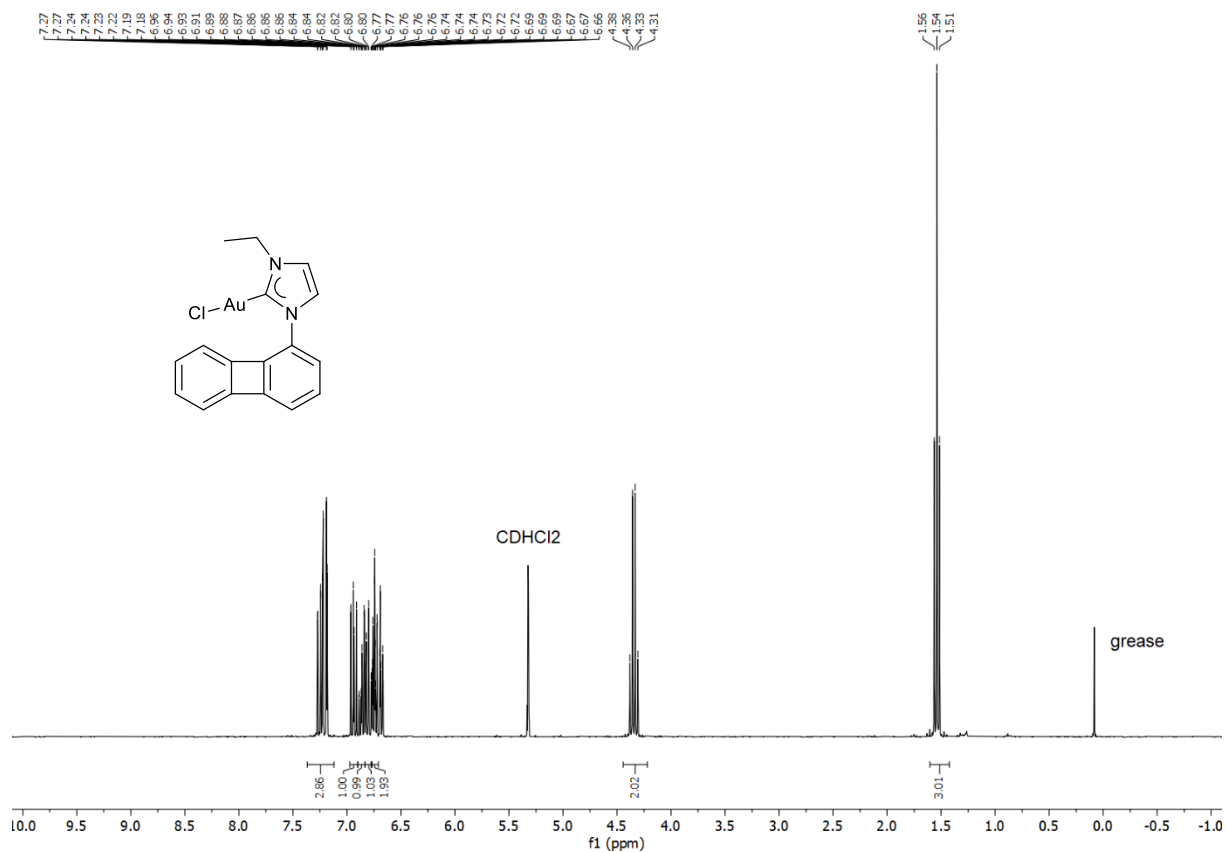

Figure S 16. <sup>1</sup>H NMR spectrum (300 MHz, CD<sub>2</sub>Cl<sub>2</sub>) of **20**.

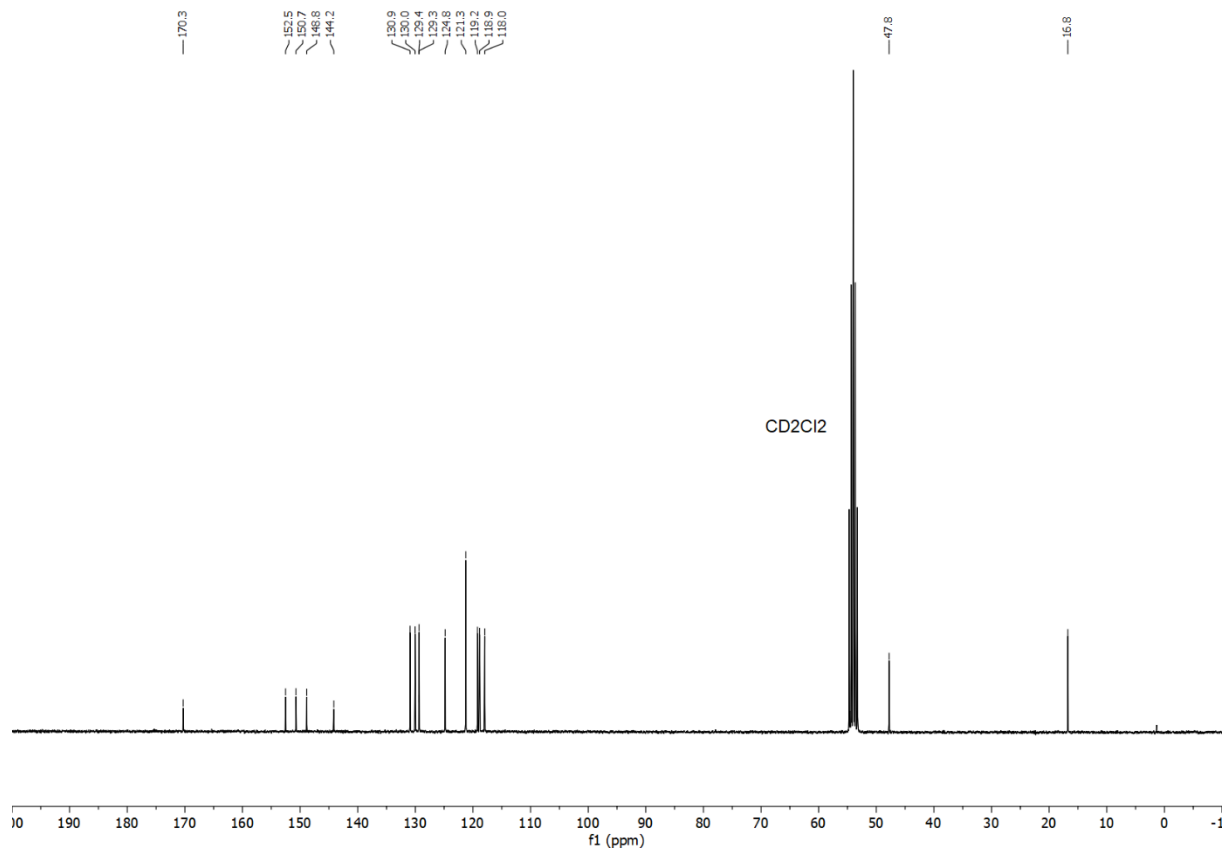

Figure S 17. <sup>13</sup>C NMR spectrum (75 MHz, CD<sub>2</sub>Cl<sub>2</sub>) of **20**.

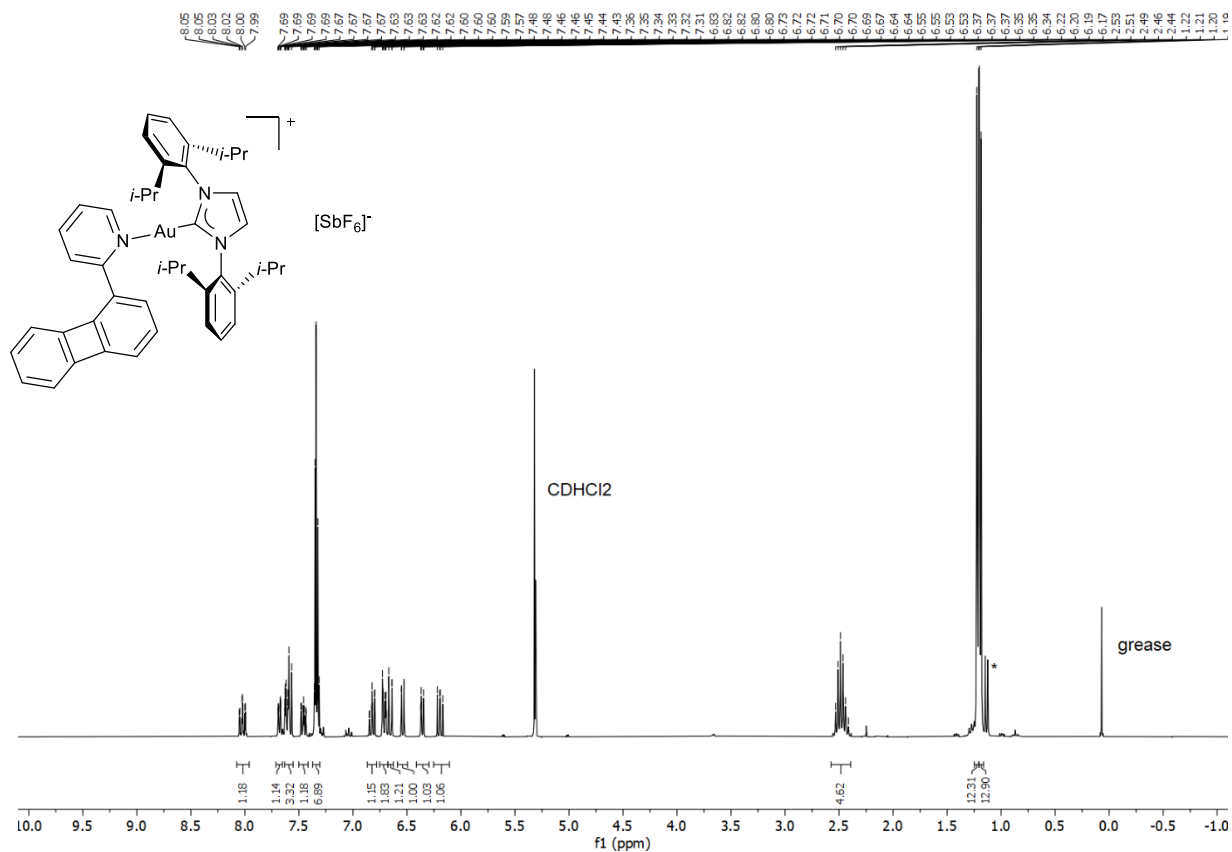

Figure S 18.  $^1\text{H}$  NMR spectrum (300 MHz,  $\text{CD}_2\text{Cl}_2$ ) of **21**.

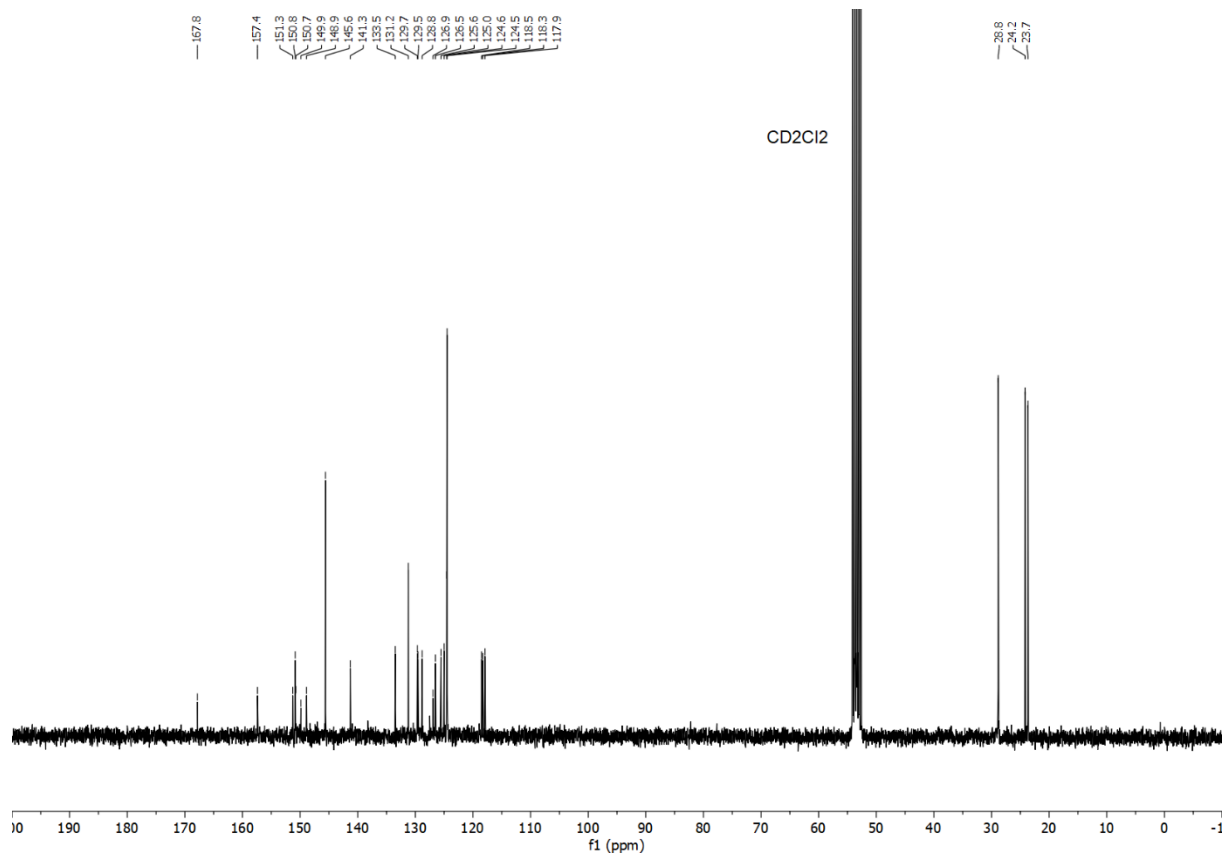

Figure S 19.  $^{13}\text{C}$  NMR spectrum (75 MHz,  $\text{CD}_2\text{Cl}_2$ ) of **21**.

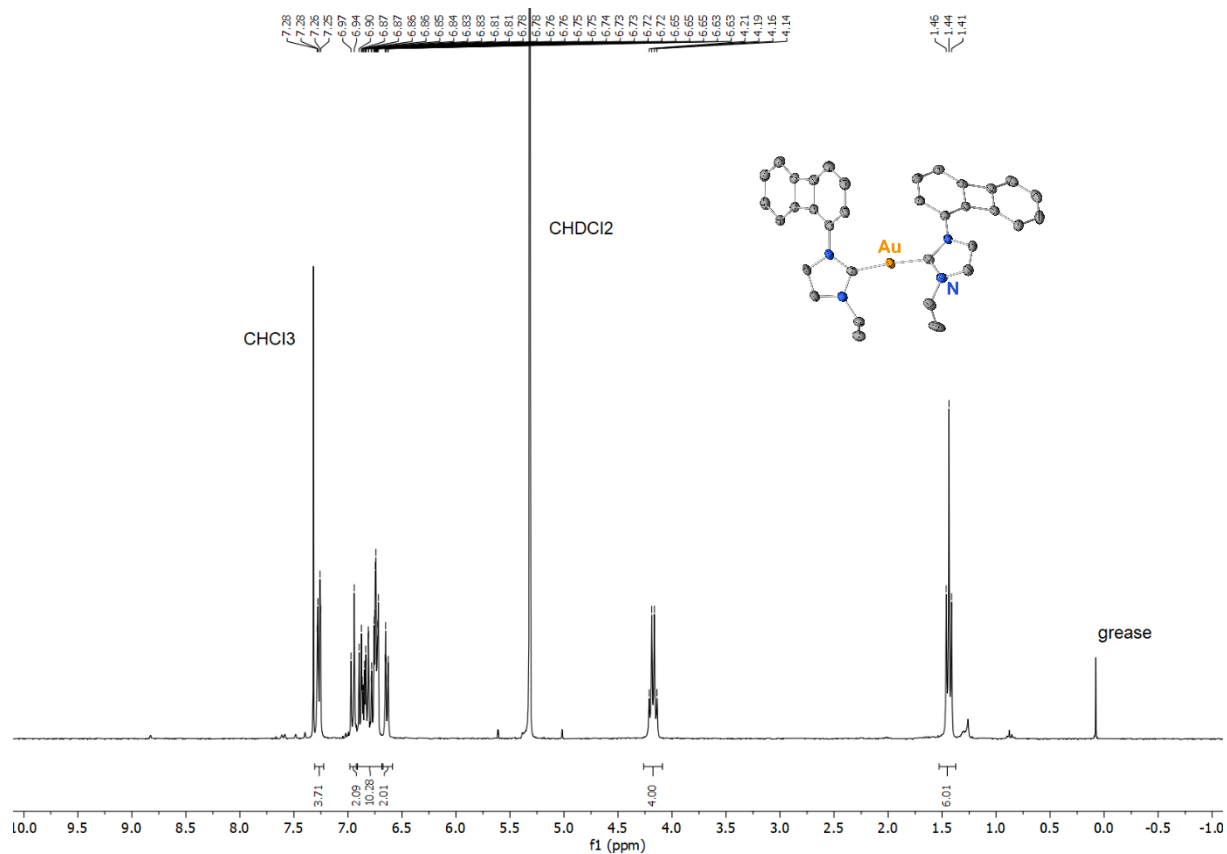

Figure S 20. <sup>1</sup>H NMR spectrum (300 MHz, CD<sub>2</sub>Cl<sub>2</sub>) of 23.

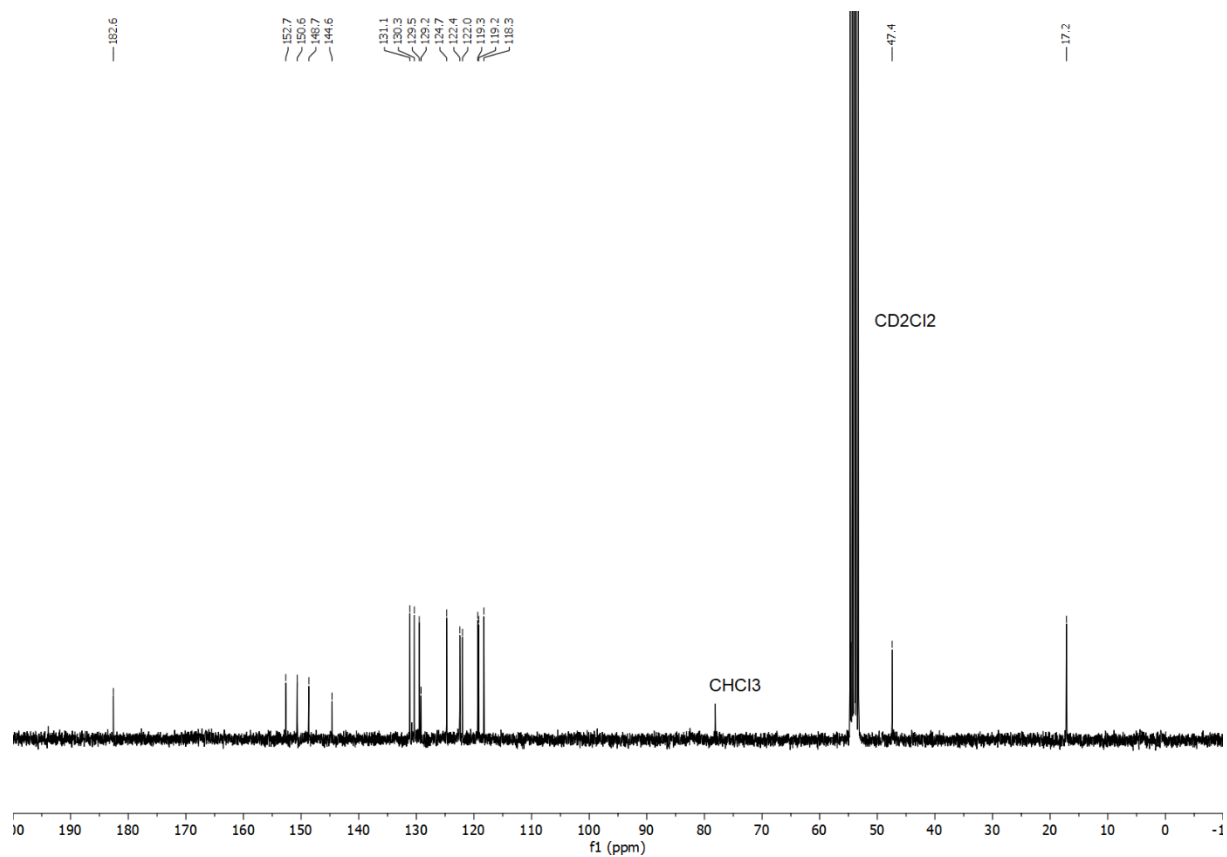

Figure S 21. <sup>13</sup>C NMR spectrum (75 MHz, CD<sub>2</sub>Cl<sub>2</sub>) of 23.

## S 5. Coordinates of Quantum Chemical Calculations

Given in xyz format.

**Table 1: Pyridine, No Ligand, I**  
30

|    |            |            |            |
|----|------------|------------|------------|
| H  | 4.0540948  | -0.2114109 | -2.5296731 |
| H  | 4.2352090  | 2.2695573  | -2.6445060 |
| H  | 2.3328910  | -3.3221303 | -1.1563306 |
| H  | 0.3734173  | -4.3085504 | 0.0440141  |
| H  | 2.8414310  | 3.7214236  | -1.2713916 |
| H  | -1.3683090 | -2.9116593 | 0.9747477  |
| H  | 1.2804236  | 2.7654468  | 0.4181381  |
| C  | 3.3743560  | 0.4080813  | -1.9593041 |
| C  | 3.4775224  | 1.8266326  | -2.0110709 |
| C  | 1.6227874  | -2.6886646 | -0.6421276 |
| C  | 2.3982673  | -0.1040114 | -1.1525661 |
| C  | 1.7101140  | -1.3203582 | -0.6136495 |
| C  | 2.6819544  | 2.6514525  | -1.2491951 |
| C  | 0.5036044  | -3.2343114 | 0.0197580  |
| C  | 1.5187000  | 0.7302655  | -0.4008851 |
| C  | 1.6691714  | 2.1329322  | -0.3769024 |
| C  | 0.7665320  | -0.5066515 | 0.0650322  |
| C  | -0.4823760 | -2.4341644 | 0.5758110  |
| C  | -0.4178709 | -1.0135270 | 0.5733236  |
| C  | -1.6455534 | -0.2649655 | 0.9412919  |
| C  | -2.4466135 | -0.6932350 | 1.9985562  |
| C  | -3.6633189 | -0.0775402 | 2.2538844  |
| C  | -4.0786976 | 0.9647379  | 1.4351590  |
| C  | -3.2437474 | 1.3713900  | 0.4102258  |
| N  | -2.0583348 | 0.7817795  | 0.1698754  |
| H  | -2.0995578 | -1.5064225 | 2.6207651  |
| H  | -4.2787624 | -0.4097902 | 3.0799249  |
| H  | -5.0246374 | 1.4659802  | 1.5855559  |
| H  | -3.5140617 | 2.1839969  | -0.2489308 |
| Au | -0.5186351 | 1.7337166  | -0.9095304 |

**Table 1: Pyridine, No Ligand, TS**  
30

|    |            |            |            |
|----|------------|------------|------------|
| H  | -0.5750825 | -4.5753819 | 1.0003913  |
| H  | 0.3157348  | -5.5609425 | -1.1024009 |
| H  | -0.9846714 | -2.1735579 | 3.2509483  |
| H  | -0.8163574 | 0.1353984  | 4.1735210  |
| H  | 1.2273089  | -4.1452187 | -2.8806895 |
| H  | -0.3192678 | 2.0353407  | 2.7350956  |
| H  | 1.2157284  | -1.6705902 | -2.6794774 |
| C  | -0.2857042 | -3.9343260 | 0.1777655  |
| C  | 0.2550734  | -4.4845272 | -1.0034796 |
| C  | -0.7547137 | -1.3376704 | 2.6031002  |
| C  | -0.3685188 | -2.5668930 | 0.2527068  |
| C  | -0.5351288 | -1.4998327 | 1.2516103  |
| C  | 0.7741639  | -3.6865300 | -2.0114119 |
| C  | -0.6359616 | -0.0373829 | 3.1206251  |
| C  | 0.0794902  | -1.7493946 | -0.8191712 |
| C  | 0.7476548  | -2.2810982 | -1.9177239 |
| C  | -0.1669083 | -0.4097933 | 0.4452673  |
| C  | -0.3197136 | 1.0395331  | 2.3094863  |
| C  | -0.0838239 | 0.8967847  | 0.9190375  |
| Au | -0.8615635 | -0.0075332 | -1.6419758 |
| C  | 0.0449863  | 2.0974428  | 0.0630767  |
| N  | -0.5073610 | 3.0558919  | -1.1823265 |
| C  | -0.4577304 | 2.1308229  | -1.9829322 |
| C  | 0.1299658  | 4.3181860  | -1.5803650 |
| C  | 0.7027428  | 4.3814750  | -0.3157260 |
| C  | 0.6606781  | 3.2646083  | 0.5073636  |
| H  | -0.9186093 | 3.0252599  | -2.9549553 |

|   |           |           |            |
|---|-----------|-----------|------------|
| H | 0.1334195 | 5.1683219 | -2.2482841 |
| H | 1.1834613 | 5.2892670 | 0.0252722  |
| H | 1.1207079 | 3.2823399 | 1.4856516  |

**Table 1: Pyridine, No Ligand, II**  
30

|    |            |            |           |
|----|------------|------------|-----------|
| C  | -0.4348352 | -0.0150856 | 0.0000000 |
| C  | -0.9726377 | 1.2559161  | 0.0000000 |
| C  | -2.3774076 | 1.2939780  | 0.0000000 |
| C  | -3.0988587 | 0.1034907  | 0.0000000 |
| C  | -2.4781613 | -1.1469839 | 0.0000000 |
| C  | -1.0795390 | -1.2399252 | 0.0000000 |
| H  | -2.8993162 | 2.2422931  | 0.0000000 |
| H  | -4.1800046 | 0.1497786  | 0.0000000 |
| H  | -3.0794214 | -2.0477052 | 0.0000000 |
| C  | -0.1881498 | -2.4015597 | 0.0000000 |
| C  | -0.5766227 | -3.7374602 | 0.0000000 |
| C  | 1.1915136  | -2.0862147 | 0.0000000 |
| C  | 0.3902742  | -4.7405590 | 0.0000000 |
| H  | -1.6275041 | -4.0006872 | 0.0000000 |
| C  | 2.1516208  | -3.0797097 | 0.0000000 |
| C  | 1.7418248  | -4.4184203 | 0.0000000 |
| H  | 0.0849496  | -5.7788489 | 0.0000000 |
| H  | 3.2098730  | -2.8451564 | 0.0000000 |
| H  | 2.4877569  | -5.2030764 | 0.0000000 |
| C  | -0.0420748 | 2.3897236  | 0.0000000 |
| C  | -0.4220125 | 3.7267112  | 0.0000000 |
| N  | 1.2809198  | 2.0553553  | 0.0000000 |
| C  | 0.5506853  | 4.7174801  | 0.0000000 |
| H  | -1.4714092 | 3.9856487  | 0.0000000 |
| C  | 2.2177201  | 3.0121433  | 0.0000000 |
| C  | 1.8940068  | 4.3586267  | 0.0000000 |
| H  | 0.2620892  | 5.7606093  | 0.0000000 |
| H  | 3.2477506  | 2.6793713  | 0.0000000 |
| H  | 2.6798276  | 5.1007963  | 0.0000000 |
| Au | 1.5371426  | -0.0905299 | 0.0000000 |

**Table 1: NHC, MeCN, I**  
37

|    |            |            |            |
|----|------------|------------|------------|
| H  | 4.7088146  | -0.5815215 | -0.7492755 |
| H  | 4.8109903  | 1.9080891  | -0.6036872 |
| H  | 2.7269997  | -3.8291492 | -0.1183900 |
| H  | 0.6238222  | -4.9281431 | 0.6590037  |
| H  | 2.9389362  | 3.2182047  | 0.2378165  |
| H  | -1.2956047 | -3.6215638 | 1.4144779  |
| H  | 0.8155164  | 2.1372778  | 0.9825988  |
| C  | 3.8590474  | -0.0170580 | -0.3879473 |
| C  | 3.9074001  | 1.3942297  | -0.2998684 |
| C  | 1.8906715  | -3.2319103 | 0.2196751  |
| C  | 2.6854952  | -0.5940891 | 0.0209159  |
| C  | 1.9064183  | -1.8632820 | 0.2513734  |
| C  | 2.8400369  | 2.1414010  | 0.1780132  |
| C  | 0.6967237  | -3.8481653 | 0.6681595  |
| C  | 1.5896075  | 0.1719256  | 0.4997528  |
| C  | 1.6323682  | 1.5384205  | 0.6008143  |
| C  | 0.8050326  | -1.0930758 | 0.7158051  |
| C  | -0.3899043 | -3.1139247 | 1.1068514  |
| C  | -0.3473228 | -1.7000761 | 1.1357335  |
| Au | -1.4612072 | 0.7278478  | -0.8913560 |
| N  | -1.4879218 | -0.9606536 | 1.5785486  |
| C  | -2.0575571 | 0.0590389  | 0.8842649  |
| N  | -3.0965232 | 0.4674829  | 1.6459403  |

|   |            |            |            |
|---|------------|------------|------------|
| C | -3.1848112 | -0.2897048 | 2.7987058  |
| C | -2.1744181 | -1.1907856 | 2.7569755  |
| C | -4.0161616 | 1.5476104  | 1.2989080  |
| H | -3.9451450 | -0.1171478 | 3.5396062  |
| H | -1.8681775 | -1.9498601 | 3.4539076  |
| H | -5.0301810 | 1.1570405  | 1.2263985  |
| H | -3.9721051 | 2.3254044  | 2.0600354  |
| H | -3.7102444 | 1.9550293  | 0.3386101  |
| N | -0.8229914 | 1.3788139  | -2.6844911 |
| C | -0.4109638 | 1.7344881  | -3.6959540 |
| C | 0.1098671  | 2.1824852  | -4.9701718 |
| H | -0.3434111 | 3.1392469  | -5.2336931 |
| H | -0.1252575 | 1.4455617  | -5.7396158 |
| H | 1.1921609  | 2.3005125  | -4.8984417 |

**Table 1: NHC, MeCN, TS**

37

|    |            |            |            |
|----|------------|------------|------------|
| H  | -0.7441813 | -3.9029126 | -2.3288431 |
| H  | 0.6907007  | -3.2729873 | -4.2693766 |
| H  | -1.6622352 | -4.1038720 | 0.4738975  |
| H  | -1.8384757 | -3.7486871 | 2.9354607  |
| H  | 2.1011108  | -1.2476576 | -4.1855373 |
| H  | -0.9486863 | -1.7048238 | 3.9819433  |
| H  | 2.0436047  | 0.2748950  | -2.2229177 |
| C  | -0.1893441 | -2.9684678 | -2.3239878 |
| C  | 0.6397767  | -2.6220274 | -3.4014817 |
| C  | -1.3018854 | -3.1836811 | 0.9244597  |
| C  | -0.2321344 | -2.1125695 | -1.2287970 |
| C  | -0.7077143 | -2.1921807 | 0.1477631  |
| C  | 1.4387473  | -1.4802465 | -3.3555564 |
| C  | -1.3705386 | -2.9942700 | 2.3105946  |
| C  | 0.5243356  | -0.9309229 | -1.2454555 |
| C  | 1.4118712  | -0.6076585 | -2.2443351 |
| C  | -0.1955944 | -1.0275738 | 0.7496175  |
| C  | -0.8440312 | -1.8524695 | 2.9111566  |
| C  | -0.2312455 | -0.8582710 | 2.1286025  |
| Au | -0.0434828 | 1.1727835  | -0.0889681 |
| C  | 1.1620033  | 3.7904846  | 2.2953407  |
| H  | 2.2394879  | 3.9698278  | 2.3404310  |
| C  | 1.0433673  | 1.9300671  | 3.9982036  |
| N  | 0.2448453  | 0.3553141  | 2.6903996  |
| C  | 0.6488591  | 0.6276289  | 3.9888912  |
| H  | 0.6440511  | 4.4924607  | 2.9532685  |
| H  | 0.6460377  | -0.1122578 | 4.7724454  |
| C  | 0.3713349  | 1.4615438  | 1.8988520  |
| H  | 0.8102992  | 3.9152760  | 1.2709322  |
| H  | 1.4277217  | 2.5425368  | 4.7989622  |
| N  | 0.8673010  | 2.4207645  | 2.7087535  |
| N  | -0.7004965 | 1.8763083  | -1.9704492 |
| C  | -1.1057343 | 2.1246703  | -3.0226547 |
| C  | -1.6116241 | 2.4328389  | -4.3441839 |
| H  | -1.4209003 | 1.5926478  | -5.0200063 |
| H  | -1.1170308 | 3.3285461  | -4.7338610 |
| H  | -2.6901206 | 2.6149430  | -4.2935645 |

**Table 1: NHC, MeCN, II**

37

|   |            |           |            |
|---|------------|-----------|------------|
| C | 0.0383151  | 1.5078075 | -0.0290714 |
| C | 1.2559722  | 2.1611304 | -0.0540555 |
| C | 1.2980901  | 3.5491753 | -0.0824795 |
| C | 0.0806926  | 4.2344615 | -0.0846512 |
| C | -1.1443165 | 3.5708365 | -0.0595577 |
| C | -1.1834820 | 2.1718229 | -0.0308785 |
| H | 2.2337667  | 4.0923364 | -0.1023047 |
| H | 0.0944367  | 5.3164073 | -0.1065831 |
| H | -2.0615857 | 4.1459371 | -0.0624206 |
| C | -2.3321375 | 1.2619232 | -0.0014312 |
| C | -3.6698627 | 1.6464402 | 0.0038804  |

|    |            |            |            |
|----|------------|------------|------------|
| C  | -1.9969472 | -0.1154558 | 0.0235506  |
| C  | -4.6740626 | 0.6822636  | 0.0338445  |
| H  | -3.9330910 | 2.6973683  | -0.0151911 |
| C  | -3.0048895 | -1.0655891 | 0.0537771  |
| C  | -4.3451631 | -0.6668948 | 0.0588976  |
| H  | -5.7129398 | 0.9865669  | 0.0378028  |
| H  | -2.7723114 | -2.1229675 | 0.0745917  |
| H  | -5.1276569 | -1.4154870 | 0.0826610  |
| Au | 0.0391432  | -0.4663480 | 0.0099728  |
| N  | 2.3717419  | 1.2775854  | -0.0471134 |
| C  | 3.7258121  | 1.5322008  | -0.0649131 |
| C  | 2.1264321  | -0.0645903 | -0.0180351 |
| C  | 4.3396302  | 0.3222370  | -0.0465066 |
| H  | 4.1344893  | 2.5259741  | -0.0886203 |
| N  | 3.3419328  | -0.6401552 | -0.0179897 |
| H  | 5.3837504  | 0.0637289  | -0.0510987 |
| C  | 3.5864644  | -2.0780059 | 0.0091149  |
| H  | 4.1425772  | -2.3733561 | -0.8796502 |
| H  | 2.6253071  | -2.5822400 | 0.0253969  |
| H  | 4.1539862  | -2.3380023 | 0.9017075  |
| N  | -0.0937856 | -2.5709344 | 0.0503549  |
| C  | -0.3108862 | -3.6991001 | 0.0701917  |
| C  | -0.5966010 | -5.1188615 | 0.0965655  |
| H  | -0.6823890 | -5.4529092 | 1.1317309  |
| H  | -1.5368524 | -5.3078327 | -0.4239570 |
| H  | 0.2064197  | -5.6674733 | -0.3975322 |

**Table 1: NHC, No Ligand, I**

31

|    |            |            |            |
|----|------------|------------|------------|
| H  | 4.4851755  | -0.2152822 | -2.0562704 |
| H  | 4.5517897  | 2.2755054  | -2.1517297 |
| H  | 2.7393011  | -3.4041242 | -0.8959621 |
| H  | 0.7370522  | -4.4964732 | 0.1264684  |
| H  | 2.8504521  | 3.6423693  | -1.0662219 |
| H  | -1.1590185 | -3.1912987 | 0.9093198  |
| H  | 0.9906062  | 2.6156680  | 0.2310375  |
| C  | 3.6969774  | 0.3704119  | -1.6018297 |
| C  | 3.7287255  | 1.7861239  | -1.6469015 |
| C  | 1.9345150  | -2.8072123 | -0.4889252 |
| C  | 2.6276337  | -0.1848157 | -0.9514183 |
| C  | 1.9272683  | -1.4378979 | -0.5081922 |
| C  | 2.7581025  | 2.5642911  | -1.0410794 |
| C  | 0.7957016  | -3.4166395 | 0.0834376  |
| C  | 1.6029678  | 0.6027701  | -0.3624963 |
| C  | 1.6556851  | 1.9878321  | -0.3547825 |
| C  | 0.8702532  | -0.6599555 | 0.0374881  |
| C  | -0.2777082 | -2.6768189 | 0.5484236  |
| C  | -0.2668007 | -1.2635021 | 0.5173415  |
| Au | -0.8697571 | 1.5043393  | -1.1360453 |
| N  | -1.4540757 | -0.5522854 | 0.8856948  |
| C  | -1.9519874 | 0.5173562  | 0.2091078  |
| N  | -3.1315474 | 0.8067626  | 0.7856065  |
| C  | -3.3868046 | -0.0759028 | 1.8209969  |
| C  | -2.3380168 | -0.9297242 | 1.8837806  |
| C  | -4.0170064 | 1.9012704  | 0.3908781  |
| H  | -4.2797767 | -0.0120674 | 2.4172028  |
| H  | -2.1340616 | -1.7510239 | 2.5464582  |
| H  | -5.0124112 | 1.5065553  | 0.1955507  |
| H  | -4.0598669 | 2.6439548  | 1.1862595  |
| H  | -3.6133677 | 2.3498136  | -0.5131981 |

**Table 1: NHC, No Ligand, TS**

31

|   |            |            |            |
|---|------------|------------|------------|
| H | -0.6778019 | -4.7400749 | 0.5410966  |
| H | 0.2667951  | -5.4878432 | -1.6337812 |
| H | -1.1302636 | -2.7062334 | 3.0462936  |
| H | -1.0276293 | -0.5274437 | 4.3253464  |
| H | 1.3281726  | -3.9001824 | -3.1691387 |



|    |            |            |            |
|----|------------|------------|------------|
| H  | -0.4564117 | 1.5323009  | 3.2255219  |
| H  | 1.4443690  | -1.4811539 | -2.6297555 |
| C  | -0.3069552 | -4.0140893 | -0.1709330 |
| C  | 0.2580330  | -4.4326967 | -1.3916894 |
| C  | -0.8495773 | -1.7839242 | 2.5549951  |
| C  | -0.3203548 | -2.6644309 | 0.0884231  |
| C  | -0.5272613 | -1.7428579 | 1.2125395  |
| C  | 0.8597813  | -3.5379235 | -2.2630148 |
| C  | -0.7726610 | -0.5834267 | 3.2738726  |
| C  | 0.2194913  | -1.7454809 | -0.8427737 |
| C  | 0.9050795  | -2.1577717 | -1.9773343 |
| C  | -0.0984156 | -0.5521207 | 0.6031797  |
| C  | -0.4131228 | 0.6087920  | 2.6619295  |
| C  | -0.0724235 | 0.6512369  | 1.2994235  |
| Au | -0.4673351 | 0.2176853  | -1.4884451 |
| C  | -0.1544475 | 3.9875108  | -2.2603601 |
| H  | 0.8016332  | 4.3353507  | -2.6487527 |
| C  | 0.5051811  | 4.0126387  | 0.1784724  |
| N  | 0.1100379  | 1.9036398  | 0.6366907  |
| C  | 0.5451090  | 3.1003643  | 1.1795143  |
| H  | -0.8414983 | 4.8260864  | -2.1597055 |
| H  | 0.8579827  | 3.1953985  | 2.2033322  |
| C  | -0.2125910 | 2.0723523  | -0.6849638 |
| H  | -0.5763584 | 3.2408858  | -2.9274515 |
| H  | 0.7586869  | 5.0581429  | 0.1727376  |
| N  | 0.0447558  | 3.3597289  | -0.9552696 |

**Table 1: NHC, No Ligand, II**

31

|    |            |            |            |
|----|------------|------------|------------|
| C  | -0.0548558 | 0.6735113  | -0.0021581 |
| C  | 1.1997008  | 1.2441799  | -0.0132364 |
| C  | 1.2640490  | 2.6346017  | -0.0188032 |
| C  | 0.0632001  | 3.3490046  | -0.0128147 |
| C  | -1.1829925 | 2.7260597  | -0.0015636 |
| C  | -1.2753500 | 1.3255845  | 0.0042129  |
| H  | 2.2141030  | 3.1524363  | -0.0275436 |
| H  | 0.1077305  | 4.4301588  | -0.0171290 |
| H  | -2.0844039 | 3.3256583  | 0.0028283  |
| C  | -2.4353706 | 0.4323629  | 0.0158308  |
| C  | -3.7695238 | 0.8262777  | 0.0239314  |
| C  | -2.1104200 | -0.9465168 | 0.0185086  |
| C  | -4.7745957 | -0.1384017 | 0.0346703  |
| H  | -4.0308945 | 1.8777252  | 0.0218749  |
| C  | -3.1140640 | -1.8995184 | 0.0292602  |
| C  | -4.4526618 | -1.4901652 | 0.0373509  |
| H  | -5.8126205 | 0.1680773  | 0.0409278  |
| H  | -2.8848224 | -2.9595829 | 0.0316656  |
| H  | -5.2385527 | -2.2350117 | 0.0457659  |
| Au | -0.0940074 | -1.3061350 | 0.0053834  |
| N  | 2.2817219  | 0.3268577  | -0.0176236 |
| C  | 3.6444453  | 0.5471823  | -0.0282258 |
| C  | 2.0042511  | -1.0120755 | -0.0106816 |
| C  | 4.2235655  | -0.6789772 | -0.0277665 |
| H  | 4.0803449  | 1.5296228  | -0.0350857 |
| N  | 3.2014585  | -1.6167576 | -0.0169554 |
| H  | 5.2607853  | -0.9643157 | -0.0341060 |
| C  | 3.4087189  | -3.0639863 | -0.0129007 |
| H  | 3.9562463  | -3.3576628 | -0.9070376 |
| H  | 2.4365402  | -3.5492341 | -0.0045281 |
| H  | 3.9682744  | -3.3509602 | 0.8759485  |

**Table 1: PPh2, Chloride, I**

47

|   |            |            |            |
|---|------------|------------|------------|
| H | 1.6658800  | -0.0392436 | -3.3445038 |
| H | 1.7988756  | 2.4254281  | -3.1269527 |
| H | 0.0413029  | -1.3147518 | -1.9863745 |
| H | 0.2996038  | 3.6097225  | -1.5511440 |
| H | -4.4996021 | -0.0625274 | -0.6161501 |

|    |            |            |            |
|----|------------|------------|------------|
| H  | 5.5077766  | -0.9029581 | -1.0468903 |
| H  | 5.7548383  | 1.5546380  | -0.6787073 |
| H  | -6.2189134 | 1.5006650  | 0.2351018  |
| H  | 3.3079362  | -4.0779027 | -0.7397949 |
| H  | -1.2903761 | 2.3354952  | -0.1599527 |
| H  | 1.1292253  | -5.0893060 | -0.0455419 |
| H  | 4.0030003  | 2.8678245  | 0.3876048  |
| H  | -0.6240029 | -3.7630949 | 0.9836529  |
| H  | 1.8689249  | 1.8241215  | 1.1512514  |
| H  | -5.7085932 | 2.9725896  | 2.1635768  |
| H  | -0.2924474 | -0.1540401 | 1.9816977  |
| H  | -1.2843732 | -1.6089309 | 2.2194352  |
| H  | -1.7539854 | 1.3539556  | 2.3665212  |
| H  | -3.4731873 | 2.8837080  | 3.2269835  |
| C  | 1.0191744  | 0.4813661  | -2.6495453 |
| C  | 1.0922760  | 1.8656199  | -2.5268283 |
| C  | 0.1131818  | -0.2385680 | -1.8815988 |
| C  | 0.2541837  | 2.5308164  | -1.6376606 |
| C  | -0.7090729 | 0.4228433  | -0.9623193 |
| C  | -0.6406441 | 1.8134193  | -0.8513925 |
| C  | 4.7192817  | -0.3382512 | -0.5653168 |
| C  | 4.8490368  | 1.0560764  | -0.3549764 |
| C  | -4.2751839 | 0.5965817  | 0.2146917  |
| C  | 2.5491293  | -3.4722656 | -0.2608869 |
| C  | 3.5501244  | -0.8991582 | -0.1233856 |
| C  | -5.2404539 | 1.4713791  | 0.6982125  |
| C  | 2.6985104  | -2.1362076 | -0.0001165 |
| C  | 3.8523624  | 1.8033701  | 0.2530544  |
| C  | 1.3105951  | -4.0326169 | 0.1323889  |
| C  | 2.5257841  | -0.1302929 | 0.4951051  |
| C  | 2.6426590  | 1.2186980  | 0.6976657  |
| C  | -3.0076325 | 0.5476642  | 0.8034084  |
| C  | 1.6736171  | -1.3648433 | 0.6115070  |
| C  | 0.3115066  | -3.2820496 | 0.7227361  |
| C  | 0.4616761  | -1.8928897 | 0.9800871  |
| C  | -4.9533343 | 2.2967258  | 1.7814427  |
| C  | -0.6689170 | -1.0594540 | 1.5044487  |
| C  | -2.7271387 | 1.3791296  | 1.8925781  |
| C  | -3.6977255 | 2.2473992  | 2.3796732  |
| Cl | -3.5086504 | -4.2280398 | -1.9410987 |
| Au | -2.6431731 | -2.3780148 | -0.9280533 |
| P  | -1.7830556 | -0.5897723 | 0.0963667  |

**Table 1: PPh2, Chloride, TS**

47

|    |            |            |            |
|----|------------|------------|------------|
| H  | -0.2751123 | -6.0294805 | 0.6447153  |
| H  | -0.2775429 | -6.7994811 | -1.7249103 |
| H  | 0.4467381  | -4.1451686 | 3.0486064  |
| H  | 1.5133974  | -2.2042846 | 4.1998276  |
| H  | 0.0981857  | -5.2134162 | -3.5596281 |
| H  | 2.0797643  | -0.1738346 | 2.9479804  |
| H  | 0.3501827  | -2.7843208 | -3.1259094 |
| H  | 2.2016634  | 0.2763950  | -0.5104051 |
| H  | 2.0199487  | 1.1864571  | 0.9940392  |
| C  | -0.1896354 | -5.3149021 | -0.1651342 |
| C  | -0.1595718 | -5.7463182 | -1.5014868 |
| C  | 0.6198827  | -3.2162821 | 2.5190897  |
| C  | -0.0538865 | -3.9629767 | 0.0701502  |
| C  | 0.2868684  | -3.0758893 | 1.1867780  |
| C  | 0.0582789  | -4.8512151 | -2.5392611 |
| C  | 1.2499311  | -2.1364486 | 3.1515532  |
| C  | 0.0847704  | -3.0571525 | -0.9960780 |
| C  | 0.2078681  | -3.4711299 | -2.3026076 |
| C  | 0.5374868  | -1.8725200 | 0.4848290  |
| C  | 1.5767110  | -0.9898291 | 2.4412359  |
| C  | 1.2561423  | -0.8347905 | 1.0787973  |
| C  | 1.5476045  | 0.4444282  | 0.3492080  |
| Au | -0.9852950 | -1.0222524 | -0.9461410 |
| P  | -0.0690385 | 1.0313497  | -0.3416038 |

|    |            |            |            |
|----|------------|------------|------------|
| C  | -0.9195543 | 1.8112951  | 1.0559934  |
| C  | -2.2709317 | 1.5163957  | 1.2534520  |
| C  | -2.9616350 | 2.0881390  | 2.3171134  |
| C  | -2.3066418 | 2.9501833  | 3.1901186  |
| C  | -0.9583708 | 3.2463088  | 2.9999006  |
| C  | -0.2667943 | 2.6807318  | 1.9365126  |
| H  | -2.7711789 | 0.8350148  | 0.5739059  |
| H  | -4.0084182 | 1.8536176  | 2.4650522  |
| H  | -2.8436872 | 3.3905423  | 4.0215124  |
| H  | -0.4475421 | 3.9167817  | 3.6803768  |
| H  | 0.7796000  | 2.9214677  | 1.7895748  |
| C  | 0.3534253  | 2.3642275  | -1.4966633 |
| C  | -0.0726709 | 3.6829981  | -1.3224649 |
| C  | 0.2453276  | 4.6499549  | -2.2711804 |
| C  | 0.9892002  | 4.3108280  | -3.3959903 |
| C  | 1.4080782  | 2.9946421  | -3.5805480 |
| C  | 1.0841685  | 2.0249341  | -2.6424502 |
| H  | -0.6547955 | 3.9521610  | -0.4505087 |
| H  | -0.0914196 | 5.6697759  | -2.1296527 |
| H  | 1.2345798  | 5.0658096  | -4.1327891 |
| H  | 1.9760684  | 2.7228178  | -4.4618419 |
| H  | 1.3849436  | 0.9954369  | -2.8052864 |
| Cl | -3.0070932 | -1.6810007 | -1.9977816 |

**Table 1: PPh<sub>2</sub>, Chloride, II**  
47

|    |            |            |            |
|----|------------|------------|------------|
| C  | -1.3964206 | -1.2574759 | 0.2775500  |
| C  | -2.1645693 | -0.0959901 | 0.2209617  |
| C  | -3.4547782 | -0.1196736 | 0.7660031  |
| C  | -3.9524767 | -1.2897207 | 1.3283932  |
| C  | -3.1876641 | -2.4543182 | 1.3501540  |
| C  | -1.8968047 | -2.4541517 | 0.8215692  |
| H  | -4.0681396 | 0.7743460  | 0.7422364  |
| H  | -4.9514305 | -1.2973546 | 1.7477621  |
| H  | -3.6012439 | -3.3586597 | 1.7808263  |
| C  | -0.9742739 | -3.5912264 | 0.7455068  |
| C  | -1.2467632 | -4.8857482 | 1.1888370  |
| C  | 0.2760851  | -3.3120915 | 0.1519623  |
| C  | -0.2934643 | -5.8887201 | 1.0420356  |
| H  | -2.2023535 | -5.1154154 | 1.6470233  |
| C  | 1.2229853  | -4.3133393 | 0.0078192  |
| C  | 0.9349228  | -5.6060034 | 0.4534026  |
| H  | -0.5109591 | -6.8924488 | 1.3874903  |
| H  | 2.1806997  | -4.0885807 | -0.4444318 |
| H  | 1.6749775  | -6.3899632 | 0.3403594  |
| C  | -1.6160620 | 1.1334074  | -0.4658602 |
| P  | 0.2219766  | 1.0014032  | -0.5675107 |
| Au | 0.5111389  | -1.3342928 | -0.3776576 |
| H  | -1.9719529 | 1.1805289  | -1.4999330 |
| H  | -1.9156320 | 2.0613422  | 0.0263344  |
| Cl | 2.7533065  | -1.4751411 | -1.1298932 |
| C  | 0.8530243  | 1.8574242  | 0.8948452  |
| C  | 2.0842252  | 2.5168419  | 0.8449064  |
| C  | 2.5980739  | 3.1142626  | 1.9894853  |
| C  | 1.8937350  | 3.0515254  | 3.1882327  |
| C  | 0.6733776  | 2.3838935  | 3.2439932  |
| C  | 0.1536682  | 1.7828740  | 2.1042765  |
| H  | 2.6354939  | 2.5616812  | -0.0860643 |
| H  | 3.5509767  | 3.6270451  | 1.9444808  |
| H  | 2.2972261  | 3.5175349  | 4.0788233  |
| H  | 0.1265148  | 2.3261251  | 4.1771202  |
| H  | -0.7871138 | 1.2478458  | 2.1582849  |
| C  | 0.7583919  | 1.9722600  | -1.9909964 |
| C  | 0.4144030  | 3.3251696  | -2.1019975 |
| C  | 0.8139268  | 4.0514500  | -3.2150964 |
| C  | 1.5631949  | 3.4348070  | -4.2163381 |
| C  | 1.9139477  | 2.0941834  | -4.1030909 |
| C  | 1.5129764  | 1.3572289  | -2.9921720 |
| H  | -0.1555845 | 3.8080893  | -1.3166094 |

|   |           |           |            |
|---|-----------|-----------|------------|
| H | 0.5460103 | 5.0973668 | -3.3019919 |
| H | 1.8765570 | 4.0050684 | -5.0825160 |
| H | 2.5042599 | 1.6182347 | -4.8761877 |
| H | 1.8016109 | 0.3183759 | -2.8823283 |

**Table 1: PPh<sub>2</sub>, No Ligand, I**  
46

|    |            |            |            |
|----|------------|------------|------------|
| H  | 3.7625142  | 4.2966372  | -1.4623027 |
| H  | 2.5008643  | 5.2783102  | -3.3518299 |
| H  | 2.8614789  | 2.3608540  | -0.2445373 |
| H  | 0.3228116  | 4.3096641  | -4.0267427 |
| H  | -2.0388860 | -0.7186672 | -0.0866920 |
| H  | -0.9244002 | -5.8013406 | 0.4465694  |
| H  | 0.2173206  | -6.2691109 | -1.7171860 |
| H  | -4.1897690 | -0.1185510 | 0.9782095  |
| H  | -1.5805158 | -3.4047955 | 3.3786385  |
| H  | -0.5903747 | 2.3600341  | -2.8222958 |
| H  | -1.2854053 | -1.1241651 | 4.3539525  |
| H  | 1.8481514  | -4.7267928 | -2.6667849 |
| H  | 0.0604755  | 0.5693607  | 3.2486545  |
| H  | 2.5245793  | -2.6528795 | -1.4522002 |
| H  | -4.6083176 | 2.2161656  | 1.6894472  |
| H  | 2.4106480  | 0.1693912  | 0.5250380  |
| H  | 1.4831991  | 1.3356760  | 1.4897440  |
| H  | -0.7267997 | 3.3602954  | 0.2800611  |
| H  | -2.8791395 | 3.9517141  | 1.3374792  |
| C  | 2.8112567  | 3.8736484  | -1.7588742 |
| C  | 2.1006793  | 4.4248203  | -2.8194782 |
| C  | 2.3007968  | 2.7776085  | -1.0710741 |
| C  | 0.8750818  | 3.8807367  | -3.2004455 |
| C  | 1.0712874  | 2.2319798  | -1.4499856 |
| C  | 0.3611289  | 2.7846198  | -2.5238913 |
| C  | -0.2350810 | -5.0789338 | 0.0292347  |
| C  | 0.4228746  | -5.3392813 | -1.2025510 |
| C  | -2.2245929 | 0.3010798  | 0.2311182  |
| C  | -0.9100009 | -2.6909929 | 2.9191139  |
| C  | 0.0614384  | -3.8902156 | 0.6373485  |
| C  | -3.4307534 | 0.6389702  | 0.8304597  |
| C  | -0.1849065 | -2.9519410 | 1.7848383  |
| C  | 1.3376734  | -4.4631654 | -1.7497136 |
| C  | -0.7506925 | -1.3929920 | 3.4517838  |
| C  | 0.9716624  | -2.9533606 | 0.0684917  |
| C  | 1.6602677  | -3.2215147 | -1.1198658 |
| C  | -1.2448673 | 1.2789423  | 0.0389706  |
| C  | 0.6810691  | -1.9919932 | 1.2002697  |
| C  | 0.0289311  | -0.4289195 | 2.8285279  |
| C  | 0.7622755  | -0.6882764 | 1.6458366  |
| C  | -3.6640088 | 1.9518253  | 1.2303814  |
| C  | 1.4125787  | 0.4333826  | 0.8796171  |
| C  | -1.4806098 | 2.5988088  | 0.4392439  |
| C  | -2.6921253 | 2.9298921  | 1.0327184  |
| Au | 0.4262289  | -1.2142896 | -1.6361505 |
| P  | 0.3639731  | 0.8077613  | -0.6131472 |

**Table 1: PPh<sub>2</sub>, No Ligand, TS**  
46

|   |            |            |            |
|---|------------|------------|------------|
| H | -1.0582935 | -5.9767348 | 0.6020134  |
| H | -1.7324444 | -6.5987821 | -1.7075477 |
| H | 0.4759864  | -4.2635708 | 2.8943053  |
| H | 1.9016020  | -2.4423524 | 3.8188112  |
| H | -1.4120135 | -5.0555759 | -3.5840456 |
| H | 2.4149811  | -0.4469394 | 2.5043599  |
| H | -0.4730083 | -2.7839485 | -3.2246197 |
| H | 2.0918308  | 0.0479872  | -0.9559104 |
| H | 2.2229962  | 0.9150408  | 0.5746276  |
| C | -1.0046429 | -5.2479703 | -0.1965317 |
| C | -1.3537167 | -5.6032164 | -1.5134914 |
| C | 0.6785486  | -3.3731304 | 2.3133625  |

|    |            |            |            |
|----|------------|------------|------------|
| C  | -0.5486550 | -3.9676702 | 0.0143076  |
| C  | 0.1726264  | -3.2035969 | 1.0392659  |
| C  | -1.1711992 | -4.7335285 | -2.5790142 |
| C  | 1.4979496  | -2.3546641 | 2.8184221  |
| C  | -0.4416379 | -3.0555926 | -1.0647873 |
| C  | -0.6568673 | -3.4376576 | -2.3811108 |
| C  | 0.5033411  | -2.0614625 | 0.2942802  |
| C  | 1.8072814  | -1.2293916 | 2.0649470  |
| C  | 1.3318514  | -1.0428972 | 0.7501423  |
| C  | 1.5918774  | 0.2396131  | -0.0037910 |
| Au | -0.9599001 | -0.9515049 | -0.9907630 |
| P  | -0.0316650 | 1.0726553  | -0.4165130 |
| C  | -0.6337315 | 1.7671537  | 1.1292154  |
| C  | -1.9143073 | 1.4404500  | 1.5811254  |
| C  | -2.3788756 | 1.9567230  | 2.7856990  |
| C  | -1.5664605 | 2.7965814  | 3.5400482  |
| C  | -0.2878256 | 3.1259340  | 3.0929463  |
| C  | 0.1810607  | 2.6149190  | 1.8908323  |
| H  | -2.5420390 | 0.7857839  | 0.9877288  |
| H  | -3.3721667 | 1.7031953  | 3.1331586  |
| H  | -1.9283037 | 3.1978891  | 4.4782767  |
| H  | 0.3413188  | 3.7822678  | 3.6807138  |
| H  | 1.1717047  | 2.8828728  | 1.5423904  |
| C  | 0.3415810  | 2.4146379  | -1.5564207 |
| C  | -0.1040799 | 3.7161644  | -1.3082477 |
| C  | 0.1644023  | 4.7242148  | -2.2277204 |
| C  | 0.8713554  | 4.4402281  | -3.3912386 |
| C  | 1.3076477  | 3.1413118  | -3.6460401 |
| C  | 1.0390005  | 2.1284523  | -2.7371089 |
| H  | -0.6557490 | 3.9400604  | -0.4045496 |
| H  | -0.1801366 | 5.7317605  | -2.0327330 |
| H  | 1.0796561  | 5.2284339  | -4.1035266 |
| H  | 1.8526697  | 2.9188275  | -4.5544981 |
| H  | 1.3664500  | 1.1170290  | -2.9507703 |

**Table 1: PPh<sub>2</sub>, No Ligand, II**  
46

|    |            |            |            |
|----|------------|------------|------------|
| C  | -1.3891292 | -1.3150406 | 0.2759177  |
| C  | -2.1061296 | -0.1382854 | 0.1873544  |
| C  | -3.4093354 | -0.1944040 | 0.7085216  |
| C  | -3.9070132 | -1.3766058 | 1.2425313  |
| C  | -3.1414313 | -2.5396831 | 1.2737353  |
| C  | -1.8344378 | -2.5400164 | 0.7790513  |
| H  | -4.0245391 | 0.6971913  | 0.6805466  |
| H  | -4.9155074 | -1.3950971 | 1.6353401  |
| H  | -3.5572957 | -3.4527512 | 1.6813021  |
| C  | -0.8885958 | -3.6509946 | 0.7025734  |
| C  | -1.1260178 | -4.9613678 | 1.1100626  |
| C  | 0.3587933  | -3.3176652 | 0.1390092  |
| C  | -0.1319365 | -5.9239312 | 0.9529828  |
| H  | -2.0785294 | -5.2378824 | 1.5461509  |
| C  | 1.3449196  | -4.2747075 | -0.0225219 |
| C  | 1.0943107  | -5.5881975 | 0.3905684  |
| H  | -0.3173438 | -6.9422829 | 1.2695852  |
| H  | 2.3069908  | -4.0287651 | -0.4591519 |
| H  | 1.8616641  | -6.3426301 | 0.2696804  |
| C  | -1.5503079 | 1.0998130  | -0.4721887 |
| P  | 0.2931687  | 1.0442116  | -0.5277624 |
| Au | 0.5381531  | -1.3244079 | -0.3264826 |
| H  | -1.8764059 | 1.1401282  | -1.5156417 |
| H  | -1.8958311 | 2.0134055  | 0.0143858  |
| C  | 0.8928001  | 1.9055941  | 0.9357030  |
| C  | 2.1754413  | 2.4664678  | 0.9332360  |
| C  | 2.6700215  | 3.0646993  | 2.0850275  |
| C  | 1.8973677  | 3.0976538  | 3.2428494  |
| C  | 0.6269123  | 2.5288653  | 3.2516643  |
| C  | 0.1231540  | 1.9292635  | 2.1040562  |
| H  | 2.7773311  | 2.4473562  | 0.0327487  |
| H  | 3.6580304  | 3.5070300  | 2.0774762  |

|   |            |           |            |
|---|------------|-----------|------------|
| H | 2.2856576  | 3.5659057 | 4.1383135  |
| H | 0.0265534  | 2.5521434 | 4.1521509  |
| H | -0.8622292 | 1.4795037 | 2.1251792  |
| C | 0.8385041  | 1.9429381 | -1.9840621 |
| C | 0.8605693  | 3.3432027 | -2.0004912 |
| C | 1.2379366  | 4.0108049 | -3.1576426 |
| C | 1.5946544  | 3.2907002 | -4.2962664 |
| C | 1.5748912  | 1.8993492 | -4.2830966 |
| C | 1.1985553  | 1.2238277 | -3.1284389 |
| H | 0.5919044  | 3.9033984 | -1.1132832 |
| H | 1.2557898  | 5.0930950 | -3.1719500 |
| H | 1.8912573  | 3.8168124 | -5.1948041 |
| H | 1.8551991  | 1.3418379 | -5.1674949 |
| H | 1.1814854  | 0.1395170 | -3.1164246 |

**Table 1: PMe<sub>2</sub>, Chloride, I**  
33

|    |            |            |            |
|----|------------|------------|------------|
| H  | 0.1136582  | -4.7598875 | -0.9684109 |
| H  | 1.4092013  | -4.4166433 | -3.0753727 |
| H  | -1.2945312 | -3.2714103 | 2.3130500  |
| H  | -1.5372953 | -1.2836389 | 3.8098468  |
| H  | 2.3580936  | -2.2492792 | -3.6517679 |
| H  | -0.5945751 | 0.8771226  | 3.2257490  |
| H  | 2.0808537  | -0.2637158 | -2.1689098 |
| H  | 1.6936049  | 1.5328008  | 0.3604993  |
| H  | 1.0549469  | 2.1946289  | 1.8574352  |
| C  | -1.8809924 | 2.7674926  | 1.0212079  |
| C  | 0.5244590  | -3.7872232 | -1.2079127 |
| C  | 1.2610448  | -3.5831547 | -2.3995704 |
| C  | -0.8722610 | -2.3156650 | 2.0306141  |
| C  | 0.3797218  | -2.6873051 | -0.4046100 |
| C  | -0.1741623 | -2.1074455 | 0.8713212  |
| C  | 1.8008897  | -2.3492290 | -2.7282994 |
| C  | -1.0064170 | -1.1832187 | 2.8709014  |
| C  | 0.9306932  | -1.4211224 | -0.7426654 |
| C  | 1.6464329  | -1.2167077 | -1.8933047 |
| C  | -0.8842597 | 1.6541002  | -1.4135918 |
| C  | 0.3729785  | -0.8410699 | 0.5304212  |
| C  | -0.4723645 | 0.0492243  | 2.5361007  |
| C  | 0.2468825  | 0.2696152  | 1.3293607  |
| C  | 0.7908389  | 1.6178514  | 0.9683218  |
| Au | 0.5156075  | 4.6567857  | -0.5376714 |
| P  | -0.3726348 | 2.6842032  | 0.0000379  |
| H  | -1.6525529 | 2.1908628  | -1.9710944 |
| H  | -0.0349033 | 1.4855778  | -2.0744574 |
| H  | -1.2788232 | 0.6948183  | -1.0754349 |
| H  | -2.6423465 | 3.3208327  | 0.4706178  |
| H  | -1.6682311 | 3.3045581  | 1.9456659  |
| H  | -2.2501647 | 1.7672173  | 1.2530526  |
| Cl | 1.4366075  | 6.6690243  | -1.0811295 |

**Table 1: PMe<sub>2</sub>, Chloride, TS**  
33

|   |            |            |            |
|---|------------|------------|------------|
| H | -1.1720617 | -4.4876305 | -0.2744654 |
| H | 0.0753146  | -5.1870084 | -2.3151446 |
| H | -1.7011828 | -2.8071980 | 2.3049247  |
| H | -1.2525818 | -1.0775532 | 4.0478582  |
| H | 1.5563340  | -3.6134081 | -3.4795532 |
| H | 0.0916149  | 0.9026484  | 3.5156448  |
| H | 1.7425951  | -1.2502564 | -2.7564177 |
| H | 2.0783359  | 1.4978208  | 0.7031372  |
| H | 1.1903884  | 2.3537294  | 1.9775152  |
| C | 1.1124166  | 3.9234472  | -0.8235390 |
| C | -0.5824763 | -3.7693350 | -0.8315127 |
| C | 0.1467129  | -4.1648655 | -1.9642605 |
| C | -1.1851940 | -1.8892572 | 2.0511196  |
| C | -0.4735183 | -2.4534169 | -0.4324777 |
| C | -0.7249374 | -1.6550662 | 0.7711597  |

|    |            |            |            |    |            |            |            |
|----|------------|------------|------------|----|------------|------------|------------|
| C  | 0.9884776  | -3.2773950 | -2.6201839 | C  | 1.6537919  | -3.3170801 | -1.3317554 |
| C  | -0.9007273 | -0.9314820 | 3.0340709  | C  | -0.7548881 | -2.2246619 | 3.0099483  |
| C  | 0.3185997  | -1.5443541 | -1.1545085 | C  | 0.6550639  | -2.5060211 | 0.6468528  |
| C  | 1.1071006  | -1.9353188 | -2.2123862 | C  | 0.0395484  | -1.9821603 | 1.9206260  |
| C  | -1.2886986 | 3.2729103  | 0.6289795  | C  | 2.2852431  | -2.0983257 | -1.5289339 |
| C  | -0.0233072 | -0.4703714 | 0.4398352  | C  | -0.9004518 | -1.1417126 | 3.9097299  |
| C  | -0.1353865 | 0.1861695  | 2.7336763  | C  | 1.2971666  | -1.2517065 | 0.4405925  |
| C  | 0.3460900  | 0.4379897  | 1.4333360  | C  | 2.1220788  | -1.0160123 | -0.6299822 |
| C  | 1.0823285  | 1.7061031  | 1.1046196  | C  | -1.4333348 | 3.0350506  | 2.0691369  |
| Au | -0.4005564 | 0.6295133  | -1.5118300 | C  | 0.6713252  | -0.7293821 | 1.7068163  |
| P  | 0.1135632  | 2.5058506  | -0.2518292 | C  | -0.2907701 | 0.0842060  | 3.6952277  |
| H  | -1.9410550 | 3.7663463  | -0.0916772 | C  | 0.5275383  | 0.3347020  | 2.5634783  |
| H  | -1.8559520 | 2.4872429  | 1.1291140  | C  | 1.1253358  | 1.6853238  | 2.2887331  |
| H  | -0.9429195 | 3.9995213  | 1.3677292  | Au | -0.4113311 | 1.4187620  | -0.7347855 |
| H  | 0.5490741  | 4.4703908  | -1.5805970 | P  | 0.0566886  | 2.6172778  | 1.1166265  |
| H  | 2.0317859  | 3.555826   | -1.2799172 | H  | -2.1056205 | 3.6301706  | 1.4512102  |
| H  | 1.3582122  | 4.5966787  | 0.0011269  | H  | -1.9426309 | 2.1171452  | 2.3621910  |
| Cl | -1.3083893 | 0.2219717  | -3.6635469 | H  | -1.1633705 | 3.6030645  | 2.9614295  |
|    |            |            |            | H  | 0.2797085  | 4.8351971  | 0.1915715  |
|    |            |            |            | H  | 1.8481137  | 4.0187119  | 0.3039939  |
|    |            |            |            | H  | 1.0982914  | 4.7057371  | 1.7653919  |
|    |            |            |            | N  | -0.9079038 | 0.3024793  | -2.4415468 |
|    |            |            |            | C  | -1.2764754 | 0.9125125  | -3.5854669 |
|    |            |            |            | C  | -1.6209510 | 0.1979916  | -4.7182371 |
|    |            |            |            | C  | -1.5886891 | -1.1919176 | -4.6746194 |
|    |            |            |            | C  | -1.2089937 | -1.8175680 | -3.4939625 |
|    |            |            |            | C  | -0.8733793 | -1.0429208 | -2.3970371 |
|    |            |            |            | H  | -1.2886288 | 1.9933650  | -3.5711295 |
|    |            |            |            | H  | -1.9093379 | 0.7280704  | -5.6154919 |
|    |            |            |            | H  | -1.8541059 | -1.7751381 | -5.5470656 |
|    |            |            |            | H  | -1.1648119 | -2.8947034 | -3.4128732 |
|    |            |            |            | H  | -0.5631132 | -1.4870075 | -1.4615138 |

**Table 1: PMe<sub>2</sub>, Chloride, II**  
33

|    |            |            |            |
|----|------------|------------|------------|
| C  | -0.7326777 | 0.0348204  | 0.0614142  |
| C  | -1.4964847 | 1.1997130  | 0.0031289  |
| C  | -2.8148070 | 1.1553301  | 0.4748991  |
| C  | -3.3396055 | -0.0336649 | 0.9682714  |
| C  | -2.5741434 | -1.1981746 | 0.9961624  |
| C  | -1.2559920 | -1.1797626 | 0.5414048  |
| H  | -3.4297375 | 2.0483958  | 0.4483929  |
| H  | -4.3604196 | -0.0559051 | 1.3305647  |
| H  | -3.0088377 | -2.1155258 | 1.3755086  |
| C  | -0.3217797 | -2.3103438 | 0.4881953  |
| C  | -0.6122148 | -3.6177473 | 0.8786798  |
| C  | 0.9615967  | -2.0071123 | -0.0191035 |
| C  | 0.3560510  | -4.6110256 | 0.7651603  |
| H  | -1.5926849 | -3.8658178 | 1.2699112  |
| C  | 1.9226465  | -2.9997367 | -0.1283263 |
| C  | 1.6172403  | -4.3058467 | 0.2633434  |
| H  | 0.1244660  | -5.6250300 | 1.0689879  |
| H  | 2.9055789  | -2.7578295 | -0.5135804 |
| H  | 2.3681614  | -5.0827711 | 0.1763405  |
| C  | -0.9178172 | 2.4561171  | -0.6143853 |
| P  | 0.9174913  | 2.3005540  | -0.7008526 |
| Au | 1.2048934  | -0.0162095 | -0.4872846 |
| H  | -1.2776183 | 2.5665103  | -1.6431561 |
| H  | -1.2130736 | 3.3603039  | -0.0755482 |
| C  | 1.5818873  | 3.2192724  | 0.7216588  |
| C  | 1.4888467  | 3.2007709  | -2.1712658 |
| H  | 1.2255205  | 4.2591017  | -2.1216600 |
| H  | 1.0447020  | 2.7526367  | -3.0602584 |
| H  | 2.5720172  | 3.0899041  | -2.2361402 |
| H  | 1.3269232  | 4.2791564  | 0.6617050  |
| H  | 2.6657427  | 3.1000660  | 0.7390863  |
| H  | 1.1708247  | 2.7954927  | 1.6383257  |
| Cl | 3.4933038  | -0.0355422 | -1.0995800 |

**Table 1: PMe<sub>2</sub>, Pyridine, I**  
43

|   |            |            |            |
|---|------------|------------|------------|
| H | 0.3399865  | -4.5221900 | -0.0760671 |
| H | 1.8223263  | -4.1150951 | -2.0443956 |
| H | -1.2425526 | -3.1720187 | 3.1981370  |
| H | -1.5048951 | -1.2740373 | 4.7983056  |
| H | 2.9290620  | -1.9738912 | -2.3906355 |
| H | -0.4329565 | 0.8740838  | 4.4244159  |
| H | 2.6353970  | -0.0773322 | -0.7967834 |
| H | 2.1112537  | 1.5967436  | 1.8276982  |
| H | 1.2274336  | 2.2792969  | 3.2003629  |
| C | 0.9042061  | 4.1984306  | 0.8186383  |
| C | 0.8096328  | -3.5574398 | -0.2188316 |

**Table 1: PMe<sub>2</sub>, Pyridine, TS**  
43

|    |            |            |            |
|----|------------|------------|------------|
| H  | -1.0504567 | -3.9833692 | 1.9376595  |
| H  | 0.6598976  | -5.2095030 | 0.6097814  |
| H  | -2.1888434 | -1.6352887 | 3.6616380  |
| H  | -2.1669343 | 0.5565095  | 4.8442325  |
| H  | 2.4804883  | -4.0042613 | -0.5133258 |
| H  | -0.6733426 | 2.3567045  | 4.1221650  |
| H  | 2.5870125  | -1.5245761 | -0.4808143 |
| H  | 2.0674156  | 2.1506889  | 1.9853810  |
| H  | 0.8815903  | 3.3282960  | 2.5671812  |
| C  | 1.8465500  | 3.8650764  | -0.4677447 |
| C  | -0.3118589 | -3.4398969 | 1.3616585  |
| C  | 0.6764274  | -4.1273442 | 0.6364889  |
| C  | -1.5879126 | -0.8152710 | 3.2894512  |
| C  | -0.2611741 | -2.0601719 | 1.3633629  |
| C  | -0.7890134 | -0.9543449 | 2.1712217  |
| C  | 1.7082396  | -3.4478626 | 0.0033538  |
| C  | -1.5468335 | 0.4086983  | 3.9694132  |
| C  | 0.7380100  | -1.3808720 | 0.6393290  |
| C  | 1.7749140  | -2.0398784 | 0.0155903  |
| C  | -0.9477886 | 3.7339778  | 0.2796921  |
| C  | 0.0211758  | 0.1111332  | 1.7264799  |
| C  | -0.6951444 | 1.4277526  | 3.5640149  |
| C  | 0.1397104  | 1.3014687  | 2.4358883  |
| C  | 1.0105343  | 2.4310839  | 1.9591886  |
| Au | 0.2731913  | 0.5332464  | -0.4840424 |
| P  | 0.5755609  | 2.7399888  | 0.1908524  |
| H  | -1.2953330 | 3.9658940  | -0.7270089 |
| H  | -1.7190129 | 3.1571333  | 0.7911915  |
| H  | -0.7686013 | 4.6628162  | 0.8246872  |
| H  | 1.5887820  | 4.1423239  | -1.4904664 |
| H  | 2.8128338  | 3.3605457  | -0.4763953 |
| H  | 1.9147341  | 4.7687939  | 0.1412219  |
| N  | -0.2700475 | -0.5446414 | -2.3522290 |
| C  | -0.6871025 | -1.8209354 | -2.3012791 |

|   |            |            |            |
|---|------------|------------|------------|
| C | -1.0779304 | -2.5159897 | -3.4343678 |
| C | -1.0294247 | -1.8771132 | -4.6673283 |
| C | -0.5951153 | -0.5574954 | -4.7209894 |
| C | -0.2292021 | 0.0750463  | -3.5445514 |
| H | -0.6991353 | -2.2829728 | -1.3231093 |
| H | -1.4110880 | -3.5409033 | -3.3434626 |
| H | -1.3244817 | -2.3968310 | -5.5699307 |
| H | -0.5400779 | -0.0197717 | -5.6578005 |
| H | 0.1087870  | 1.1021157  | -3.5362789 |

**Table 1: PMe<sub>2</sub>, Pyridine, II**  
43

|    |            |            |            |
|----|------------|------------|------------|
| C  | -1.8624888 | 0.0748573  | 0.3928482  |
| C  | -2.6639281 | 1.2096682  | 0.2983916  |
| C  | -3.9659895 | 1.1427690  | 0.8091857  |
| C  | -4.4351766 | -0.0383704 | 1.3706357  |
| C  | -3.6314092 | -1.1751368 | 1.4265365  |
| C  | -2.3279847 | -1.1355770 | 0.9345467  |
| H  | -4.6105710 | 2.0123827  | 0.7578609  |
| H  | -5.4439855 | -0.0779363 | 1.7615916  |
| H  | -4.0260613 | -2.0892185 | 1.8525693  |
| C  | -1.3710406 | -2.2443425 | 0.8819245  |
| C  | -1.6140512 | -3.5455158 | 1.3174947  |
| C  | -0.1212712 | -1.9331099 | 0.3045092  |
| C  | -0.6364965 | -4.5265107 | 1.1739410  |
| H  | -2.5670090 | -3.8011321 | 1.7652272  |
| C  | 0.8455310  | -2.9148510 | 0.1545534  |
| C  | 0.5860649  | -4.2177322 | 0.5908094  |
| H  | -0.8343206 | -5.5354582 | 1.5130727  |
| H  | 1.8021640  | -2.6956884 | -0.3038745 |
| H  | 1.3407065  | -4.9852639 | 0.4699638  |
| C  | -2.1457070 | 2.4482862  | -0.3944370 |
| P  | -0.3115844 | 2.4064307  | -0.3785136 |
| Au | 0.0636849  | 0.0622388  | -0.1908747 |
| H  | -2.4600967 | 2.4540885  | -1.4434947 |
| H  | -2.5173817 | 3.3702410  | 0.0586742  |
| C  | 0.1956505  | 3.2849598  | 1.1316225  |
| C  | 0.2776595  | 3.4208212  | -1.7679064 |
| H  | -0.1174428 | 4.4360097  | -1.6964252 |
| H  | -0.0463216 | 2.9764100  | -2.7093655 |
| H  | 1.3675707  | 3.4626429  | -1.7540972 |
| H  | -0.1430676 | 4.3220898  | 1.1019613  |
| H  | 1.2815645  | 3.2640702  | 1.2287731  |
| H  | -0.2443977 | 2.7852253  | 1.9951266  |
| N  | 2.1405061  | -0.0615078 | -0.7500981 |
| C  | 2.5160693  | 0.0184503  | -2.0377050 |
| C  | 3.8404626  | -0.0966223 | -2.4240865 |
| C  | 4.8113831  | -0.2969611 | -1.4489010 |
| C  | 4.4192160  | -0.3797868 | -0.1178461 |
| C  | 3.0752408  | -0.2626035 | 0.1947308  |
| H  | 1.7248389  | 0.1683223  | -2.7601193 |
| H  | 4.0986537  | -0.0332855 | -3.4723197 |
| H  | 5.8543598  | -0.3914442 | -1.7223423 |
| H  | 5.1386087  | -0.5410693 | 0.6732964  |
| H  | 2.7178475  | -0.3408395 | 1.2125599  |

**Table 1: PMe<sub>2</sub>, OTf, I**  
40

|   |            |            |            |
|---|------------|------------|------------|
| H | 0.0339879  | -4.9611516 | 0.2569752  |
| H | 0.4697710  | -4.7005263 | -2.1877910 |
| H | -0.1000866 | -3.3341796 | 3.7703283  |
| H | 0.1699866  | -1.2816077 | 5.1712673  |
| H | 1.1965174  | -2.5775050 | -3.1377356 |
| H | 0.8490557  | 0.8430843  | 4.2043673  |
| H | 1.5556095  | -0.5704525 | -1.7267241 |
| H | 2.1188481  | 1.3715156  | 0.7851116  |
| H | 1.7514062  | 2.1542332  | 2.3311878  |
| C | 0.4235788  | 3.8933748  | 0.3130845  |

|    |            |            |            |
|----|------------|------------|------------|
| C  | 0.3687188  | -4.0125066 | -0.1434602 |
| C  | 0.6210310  | -3.8557923 | -1.5270584 |
| C  | 0.2162581  | -2.4013669 | 3.3215161  |
| C  | 0.5643392  | -2.8944971 | 0.6237430  |
| C  | 0.4972932  | -2.2599800 | 1.9888546  |
| C  | 1.0426210  | -2.6511216 | -2.0691573 |
| C  | 0.3649225  | -1.2309420 | 4.1067961  |
| C  | 0.9882250  | -1.6582435 | 0.0662904  |
| C  | 1.2453872  | -1.5013411 | -1.2713113 |
| C  | -1.2565592 | 2.5010935  | 2.2024764  |
| C  | 0.9070817  | -1.0198718 | 1.4266213  |
| C  | 0.7506095  | -0.0213853 | 3.5563655  |
| C  | 1.0337167  | 0.1267207  | 2.1710692  |
| C  | 1.3697371  | 1.4632049  | 1.5743733  |
| Au | -0.9722650 | 1.0500940  | -0.8580789 |
| P  | -0.1213441 | 2.2266943  | 0.8078772  |
| H  | -2.1532928 | 3.0045463  | 1.8413824  |
| H  | -1.5388386 | 1.5380123  | 2.6270792  |
| H  | -0.7789175 | 3.1118146  | 2.9713949  |
| H  | -0.4268842 | 4.4512937  | -0.0791306 |
| H  | 1.1721888  | 3.8088240  | -0.4748791 |
| H  | 0.8480324  | 4.4273913  | 1.1657250  |
| O  | -1.8042447 | -0.0305091 | -2.4203692 |
| S  | -1.0996098 | -0.0414948 | -3.7614153 |
| C  | -2.1188529 | 1.2028473  | -4.6941615 |
| O  | 0.2217609  | 0.5417224  | -3.6951969 |
| O  | -1.2913504 | -1.2854190 | -4.4500315 |
| F  | -2.0832787 | 2.3983856  | -4.0759107 |
| F  | -3.3967074 | 0.8159849  | -4.7784162 |
| F  | -1.6384522 | 1.3590562  | -5.9330586 |

**Table 1: PMe<sub>2</sub>, OTf, TS**  
40

|          |            |            |            |
|----------|------------|------------|------------|
| Energy = |            |            |            |
| H        | -0.0119755 | -5.0028145 | 0.7924356  |
| H        | 1.6510919  | -5.3662589 | -1.0280955 |
| H        | -1.3507614 | -3.3645580 | 3.2394286  |
| H        | -1.6192837 | -1.4535947 | 4.8241994  |
| H        | 2.8335667  | -3.4745253 | -2.0489626 |
| H        | -0.7729082 | 0.7711532  | 4.2504412  |
| H        | 2.3241275  | -1.1343579 | -1.3941928 |
| H        | 1.3887656  | 1.6823307  | 1.6234780  |
| H        | 0.1722281  | 2.3474141  | 2.7272424  |
| C        | 0.1192482  | 3.6373260  | -0.2513842 |
| C        | 0.4409930  | -4.1588335 | 0.2867080  |
| C        | 1.4065462  | -4.3575282 | -0.7189584 |
| C        | -1.0486386 | -2.3645864 | 2.9537009  |
| C        | 0.1425258  | -2.8593880 | 0.6249475  |
| C        | -0.4790525 | -2.1055110 | 1.7264588  |
| C        | 2.0801617  | -3.2906081 | -1.2930777 |
| C        | -1.1653827 | -1.2936406 | 3.8542215  |
| C        | 0.7795474  | -1.7776035 | -0.0182748 |
| C        | 1.7975461  | -1.9580897 | -0.9303248 |
| C        | -2.2654342 | 2.5859324  | 1.0269121  |
| C        | -0.0395073 | -0.8078767 | 1.3714309  |
| C        | -0.6773834 | -0.0356154 | 3.5319853  |
| C        | -0.0784329 | 0.2451532  | 2.2869199  |
| C        | 0.3337175  | 1.6419614  | 1.9093338  |
| Au       | -0.3382445 | 0.0787437  | -0.6685992 |
| P        | -0.6260509 | 2.1074634  | 0.3896978  |
| H        | -2.9120478 | 2.8548290  | 0.1914381  |
| H        | -2.7030496 | 1.7336836  | 1.5479555  |
| H        | -2.1874278 | 3.4316914  | 1.7136196  |
| H        | -0.4873195 | 4.0002554  | -1.0813271 |
| H        | 1.1111948  | 3.4032002  | -0.6383749 |
| H        | 0.1830979  | 4.4060411  | 0.5216674  |
| O        | -0.2522862 | -0.3278577 | -2.8933034 |
| S        | 0.8013717  | 0.5189767  | -3.5283522 |
| C        | -0.2110213 | 1.8803841  | -4.2903662 |
| O        | 1.4596218  | -0.1172242 | -4.6362727 |

|   |            |           |            |
|---|------------|-----------|------------|
| O | 1.6241148  | 1.2089766 | -2.5446461 |
| F | -0.9343241 | 2.5258019 | -3.3450574 |
| F | 0.5779479  | 2.7859901 | -4.8840616 |
| F | -1.0668826 | 1.4031641 | -5.2005910 |

**Table 1: PMe<sub>2</sub>, OTf, II**  
40

|    |            |            |            |
|----|------------|------------|------------|
| C  | -1.5071221 | 0.0156053  | 0.3845768  |
| C  | -2.1831483 | 1.2145458  | 0.1774003  |
| C  | -3.5176398 | 1.3013160  | 0.5949632  |
| C  | -4.1429234 | 0.2061690  | 1.1779189  |
| C  | -3.4621059 | -0.9969996 | 1.3495114  |
| C  | -2.1302063 | -1.1110773 | 0.9537180  |
| H  | -4.0644865 | 2.2267103  | 0.4533199  |
| H  | -5.1751461 | 0.2873870  | 1.4961870  |
| H  | -3.9708436 | -1.8438928 | 1.7941959  |
| C  | -1.2819376 | -2.3013954 | 1.0484289  |
| C  | -1.6696359 | -3.5455054 | 1.5448220  |
| C  | 0.0325480  | -2.1290352 | 0.5703938  |
| C  | -0.7614863 | -4.6002843 | 1.5618125  |
| H  | -2.6766772 | -3.6966195 | 1.9169334  |
| C  | 0.9371759  | -3.1775372 | 0.5905313  |
| C  | 0.5336951  | -4.4202350 | 1.0874695  |
| H  | -1.0666752 | -5.5655709 | 1.9474598  |
| H  | 1.9477207  | -3.0349659 | 0.2295362  |
| H  | 1.2367292  | -5.2447401 | 1.1039334  |
| C  | -1.4989749 | 2.3543532  | -0.5359404 |
| P  | 0.3298534  | 2.1321573  | -0.4717991 |
| Au | 0.4306442  | -0.2128080 | -0.0627427 |
| H  | -1.7807715 | 2.3491684  | -1.5944802 |
| H  | -1.7882792 | 3.3288885  | -0.1344613 |
| C  | 0.8751019  | 3.0894523  | 0.9744622  |
| C  | 0.9554155  | 3.0186231  | -1.9289238 |
| H  | 0.5591750  | 4.0365346  | -1.9351469 |
| H  | 0.6396479  | 2.4996311  | -2.8335082 |
| H  | 2.0419473  | 3.0391427  | -1.8896689 |
| H  | 0.6222242  | 4.1442453  | 0.8499406  |
| H  | 1.9524779  | 2.9728914  | 1.0795472  |
| H  | 0.3799025  | 2.7000862  | 1.8646355  |
| O  | 2.4576687  | -0.7177323 | -0.4225129 |
| S  | 3.6134682  | 0.2054257  | -0.6961401 |
| C  | 3.7336036  | 0.0686440  | -2.5455027 |
| O  | 4.8485840  | -0.3156668 | -0.1909989 |
| O  | 3.2876734  | 1.5974823  | -0.4576862 |
| F  | 2.5591714  | 0.4125143  | -3.1163642 |
| F  | 4.6774950  | 0.8918856  | -3.0160369 |
| F  | 4.0261368  | -1.1787939 | -2.9197845 |

**Table 1: PMe<sub>2</sub>, MeCN, I**  
38

|   |            |            |            |
|---|------------|------------|------------|
| H | -0.0166956 | -4.2558869 | -1.1123948 |
| H | 1.0904714  | -3.6051042 | -3.2545677 |
| H | -0.9267886 | -3.3360966 | 2.5437705  |
| H | -0.8896703 | -1.6375398 | 4.3720980  |
| H | 2.1828706  | -1.4436746 | -3.5251131 |
| H | 0.0917504  | 0.5630659  | 4.0567485  |
| H | 2.2311145  | 0.2348338  | -1.6812476 |
| H | 2.1029602  | 1.6502760  | 1.1354607  |
| H | 1.4556735  | 2.1633910  | 2.7010032  |
| C | 0.6313397  | 4.2344989  | 5.178129   |
| C | 0.4428540  | -3.2813877 | -1.2180870 |
| C | 1.0714084  | -2.9011030 | -2.4310100 |
| C | -0.4683930 | -2.3690728 | 2.3842765  |
| C | 0.4886070  | -2.3544707 | -0.2108577 |
| C | 0.1288209  | -1.9959152 | 1.2089967  |
| C | 1.6946925  | -1.6719479 | -2.5854837 |
| C | -0.4494384 | -1.3967744 | 3.4125945  |
| C | 1.1095076  | -1.0846806 | -0.3759879 |

|    |            |            |            |
|----|------------|------------|------------|
| C  | 1.7302461  | -0.7151271 | -1.5420687 |
| C  | -1.3788736 | 2.9110540  | 2.1343855  |
| C  | 0.7257684  | -0.7202644 | 1.0346916  |
| C  | 0.1103426  | -0.1416027 | 3.2328020  |
| C  | 0.7182674  | 0.2469701  | 2.0113019  |
| C  | 1.2141308  | 1.6452031  | 1.7698025  |
| Au | -0.8435673 | 1.4332348  | -0.8723297 |
| P  | -0.0883522 | 2.6089507  | 0.8931553  |
| H  | -2.1842001 | 3.4946277  | 1.6885653  |
| H  | -1.7798566 | 1.9567442  | 2.4754938  |
| H  | -0.9620500 | 3.4563479  | 2.9832186  |
| H  | -0.1255313 | 4.8704019  | 0.0579105  |
| H  | 1.4613538  | 4.1179823  | -0.1789140 |
| H  | 0.9899126  | 4.7062603  | 1.4344238  |
| N  | -1.4928672 | 0.2389072  | -2.4039579 |
| C  | -1.7285702 | -0.5647741 | -3.1897022 |
| C  | -2.0300559 | -1.5735550 | -4.1816043 |
| H  | -1.1977962 | -1.6488260 | -4.8824551 |
| H  | -2.1697411 | -2.5340158 | -3.6840422 |
| H  | -2.9396448 | -1.3009301 | -4.7186890 |

**Table 1: PMe<sub>2</sub>, MeCN, TS**  
38

|    |            |            |            |
|----|------------|------------|------------|
| H  | -0.8392354 | -3.0035071 | -3.2872406 |
| H  | 0.7338829  | -1.9970510 | -4.9311284 |
| H  | -1.8369293 | -3.8976265 | -0.4638279 |
| H  | -1.7343834 | -4.2123320 | 2.0050870  |
| H  | 2.3633883  | -0.2983820 | -4.2358156 |
| H  | -0.3830541 | -2.7249906 | 3.4034650  |
| H  | 2.4019109  | 0.5637164  | -1.9069404 |
| H  | 2.0937636  | -0.4997364 | 2.4002742  |
| H  | 0.9608804  | -0.7686395 | 3.7320985  |
| C  | 1.5716211  | 2.3590512  | 3.1442484  |
| C  | -0.1950689 | -2.1829715 | -2.9968739 |
| C  | 0.7183231  | -1.6325941 | -3.9117660 |
| C  | -1.3101583 | -3.1869253 | 0.1602207  |
| C  | -0.1899622 | -1.6837425 | -1.7107695 |
| C  | -0.6505870 | -2.1012115 | -0.3817390 |
| C  | 1.6421842  | -0.6737710 | -3.5201736 |
| C  | -1.2201379 | -3.3783205 | 1.5449837  |
| C  | 0.6956418  | -0.6517196 | -1.3523626 |
| C  | 1.6687833  | -0.1762339 | -2.2012460 |
| C  | -1.1191851 | 1.3072784  | 3.3647787  |
| C  | 0.0696166  | -1.2110462 | 0.4426775  |
| C  | -0.4487576 | -2.5390958 | 2.3376202  |
| C  | 0.2481681  | -1.4366994 | 1.8040273  |
| C  | 1.0356572  | -0.4984755 | 2.6773320  |
| Au | 0.0603190  | 1.0118689  | 0.0707021  |
| P  | 0.3989231  | 1.2063883  | 2.3651066  |
| H  | -1.5812323 | 2.2855352  | 3.2327028  |
| H  | -1.8184725 | 0.5412628  | 3.0280741  |
| H  | -0.8926915 | 1.1521585  | 4.4214405  |
| H  | 1.1965047  | 3.3777711  | 3.0408147  |
| H  | 2.5382838  | 2.2911316  | 2.6449941  |
| H  | 1.6932585  | 2.1272211  | 4.2042742  |
| N  | -0.6395597 | 2.2929615  | -1.5390945 |
| C  | -1.0061581 | 2.9089022  | -2.4385902 |
| C  | -1.4679174 | 3.6855561  | -3.5723604 |
| H  | -1.0443129 | 4.6897857  | -3.5274123 |
| H  | -1.1568094 | 3.2016554  | -4.4991439 |
| H  | -2.5564974 | 3.7528273  | -3.5484373 |

**Table 1: PMe<sub>2</sub>, MeCN, II**  
38

|   |            |           |           |
|---|------------|-----------|-----------|
| C | -1.4426219 | 0.0899365 | 0.2593009 |
| C | -2.2216948 | 1.2400221 | 0.1555785 |
| C | -3.5330139 | 1.1922642 | 0.6440306 |
| C | -4.0338424 | 0.0173228 | 1.1901966 |

|    |            |            |            |
|----|------------|------------|------------|
| C  | -3.2524071 | -1.1340555 | 1.2509791  |
| C  | -1.9401392 | -1.1161140 | 0.7821529  |
| H  | -4.1600006 | 2.0740498  | 0.5852200  |
| H  | -5.0497683 | -0.0058618 | 1.5634754  |
| H  | -3.6700462 | -2.0444668 | 1.6624386  |
| C  | -1.0049828 | -2.2409189 | 0.7384745  |
| C  | -1.2742193 | -3.5389062 | 1.1680619  |
| C  | 0.2572908  | -1.9467415 | 0.1837557  |
| C  | -0.3063643 | -4.5315809 | 1.0436952  |
| H  | -2.2386350 | -3.7815703 | 1.5979796  |
| C  | 1.2178624  | -2.9369119 | 0.0596236  |
| C  | 0.9332111  | -4.2362066 | 0.4899671  |
| H  | -0.5229734 | -5.5381329 | 1.3782265  |
| H  | 2.1894445  | -2.7241066 | -0.3682184 |
| H  | 1.6829300  | -5.0115633 | 0.3904800  |
| C  | -1.6774541 | 2.4729061  | -0.5247988 |
| P  | 0.1534506  | 2.4110187  | -0.4736408 |
| Au | 0.4836947  | 0.0500520  | -0.3063151 |
| H  | -1.9716207 | 2.4817679  | -1.5796042 |
| H  | -2.0491928 | 3.3975408  | -0.0775466 |
| C  | 0.6399547  | 3.2609683  | 1.0588421  |
| C  | 0.7803344  | 3.4299733  | -1.8416527 |
| H  | 0.3835465  | 4.4448456  | -1.7745884 |
| H  | 0.4823147  | 2.9883404  | -2.7927326 |
| H  | 1.8692583  | 3.4710167  | -1.7982636 |
| H  | 0.3170986  | 4.3033273  | 1.0346666  |
| H  | 1.7226443  | 3.2216009  | 1.1811226  |
| H  | 0.1732422  | 2.7563899  | 1.9053423  |
| N  | 2.5100055  | -0.1018352 | -0.8892362 |
| C  | 3.6021025  | -0.2684583 | -1.2046844 |
| C  | 4.9778749  | -0.4925019 | -1.5990957 |
| H  | 5.3217784  | 0.3310292  | -2.2262980 |
| H  | 5.6047502  | -0.5575884 | -0.7083903 |
| H  | 5.0461878  | -1.4268512 | -2.1585447 |

**Table 1: PMe<sub>2</sub>, No Ligand, I**  
32

|    |            |            |            |
|----|------------|------------|------------|
| C  | -4.2852885 | 0.1560913  | -0.6030198 |
| C  | -3.4318408 | 0.8116151  | -1.5304191 |
| C  | -2.1459782 | 1.0346859  | -1.1212116 |
| C  | -1.6755317 | 0.6286152  | 0.1600427  |
| C  | -2.5228289 | 0.0289010  | 1.1006388  |
| C  | -3.8620897 | -0.2076478 | 0.6584675  |
| H  | -5.3110178 | -0.0405185 | -0.8872753 |
| H  | -3.8046765 | 1.1142187  | -2.5002063 |
| H  | -2.2802260 | -0.0555924 | 2.1568666  |
| H  | -4.5627838 | -0.6591301 | 1.3485691  |
| C  | -0.7805464 | 1.5653428  | -1.4535167 |
| C  | 0.0322681  | 2.1199841  | -2.4082497 |
| C  | 1.4009618  | 2.1879626  | -2.0686141 |
| C  | 1.8942244  | 1.6634180  | -0.8815053 |
| C  | 1.0600577  | 1.0703815  | 0.0976242  |
| C  | -0.2871455 | 1.1138253  | -0.2021011 |
| H  | -0.3226773 | 2.4665846  | -3.3694312 |
| H  | 2.0972285  | 2.6305361  | -2.7696651 |
| H  | 2.9621601  | 1.7006175  | -0.6991734 |
| C  | 1.6536693  | 0.3307365  | 1.2702587  |
| H  | 1.1649577  | 0.5869499  | 2.2128950  |
| P  | 1.4405586  | -1.4979049 | 1.0384929  |
| H  | 2.7192268  | 0.5502709  | 1.3726812  |
| C  | 2.4428016  | -1.9369049 | -0.4070938 |
| C  | 2.2073430  | -2.2954987 | 2.4764004  |
| Au | -0.8073677 | -1.6083480 | 0.8070901  |
| H  | 2.1393814  | -3.3781742 | 2.3683020  |
| H  | 1.6831974  | -1.9996338 | 3.3849216  |
| H  | 3.2569970  | -2.0035494 | 2.5491139  |
| H  | 3.4907687  | -1.6922709 | -0.2220872 |
| H  | 2.0863671  | -1.3811120 | -1.2741714 |
| H  | 2.3478294  | -3.0044513 | -0.6046239 |

**Table 1: PMe<sub>2</sub>, No Ligand, TS**  
32

|    |            |            |            |
|----|------------|------------|------------|
| H  | -1.1110177 | -4.3922448 | 1.2459461  |
| H  | -0.3676844 | -5.6433251 | -0.7686541 |
| H  | -1.1656780 | -1.9327009 | 3.3612132  |
| H  | -0.5671898 | 0.2998350  | 4.2888996  |
| H  | 0.8551633  | -4.5293364 | -2.5766299 |
| H  | 0.4690474  | 2.0143957  | 2.8909276  |
| H  | 1.3231893  | -2.0918565 | -2.4909531 |
| H  | 2.0526918  | 1.6658964  | -0.2046309 |
| H  | 1.2498649  | 2.8558798  | 0.8233820  |
| C  | 0.8271485  | 3.3980784  | -2.3311090 |
| C  | -0.6662019 | -3.8664709 | 0.4109431  |
| C  | -0.2121074 | -4.5230285 | -0.7192665 |
| C  | -0.7289316 | -1.1716514 | 2.7276353  |
| C  | -0.4716454 | -2.5053620 | 0.4263381  |
| C  | -0.4693533 | -1.3978670 | 1.3897949  |
| C  | 0.4830777  | -3.9466597 | -1.7437331 |
| C  | -0.3702465 | 0.0790506  | 3.2478270  |
| C  | 0.1629088  | -1.8572301 | -0.6622473 |
| C  | 0.7351710  | -2.5616429 | -1.7123358 |
| C  | -1.4348238 | 3.2421113  | -0.5019467 |
| C  | 0.1522436  | -0.4088591 | 0.6122332  |
| C  | 0.2355836  | 1.0482962  | 2.4580361  |
| C  | 0.5360530  | 0.8370400  | 1.0957021  |
| C  | 1.0921526  | 1.9505614  | 0.2340333  |
| Au | -0.4081234 | 0.0473364  | -1.5169648 |
| P  | -0.0530653 | 2.2902266  | -1.1947875 |
| H  | -2.1664795 | 3.4452371  | -1.2840125 |
| H  | -1.9135703 | 2.6588001  | 0.2849404  |
| H  | -1.0730894 | 4.1855538  | -0.0886750 |
| H  | 0.1704992  | 3.6476446  | -3.1651952 |
| H  | 1.7133662  | 2.8971393  | -2.7201021 |
| H  | 1.1210468  | 4.3151523  | -1.8166084 |

**Table 1: PMe<sub>2</sub>, No Ligand, II**  
32

|    |            |            |            |
|----|------------|------------|------------|
| C  | -0.6679054 | -0.0091594 | 0.0416950  |
| C  | -1.3645273 | 1.1773928  | -0.0732736 |
| C  | -2.6767747 | 1.1469594  | 0.4263538  |
| C  | -3.2020242 | -0.0217907 | 0.9631821  |
| C  | -2.4566118 | -1.1972643 | 1.0171718  |
| C  | -1.1414534 | -1.2230390 | 0.5459946  |
| H  | -3.2770078 | 2.0479901  | 0.3804705  |
| H  | -4.2169652 | -0.0201377 | 1.3392189  |
| H  | -2.8954054 | -2.1007494 | 1.4220986  |
| C  | -0.2139078 | -2.3490501 | 0.4827734  |
| C  | -0.4716231 | -3.6552927 | 0.8902880  |
| C  | 1.0410642  | -2.0370905 | -0.0754118 |
| C  | 0.5095254  | -4.6320081 | 0.7373910  |
| H  | -1.4295546 | -3.9174881 | 1.3231249  |
| C  | 2.0145721  | -3.0063201 | -0.2356355 |
| C  | 1.7422739  | -4.3156016 | 0.1782365  |
| H  | 0.3083278  | -5.6472564 | 1.0541410  |
| H  | 2.9806084  | -2.7754982 | -0.6716198 |
| H  | 2.4984002  | -5.0814360 | 0.0592267  |
| C  | -0.7806339 | 2.3977315  | -0.7450080 |
| P  | 1.0590306  | 2.3268204  | -0.7418934 |
| Au | 1.2718094  | -0.0502996 | -0.5260744 |
| H  | -1.0962543 | 2.4223127  | -1.7929107 |
| H  | -1.1333298 | 3.3200130  | -0.2791769 |
| C  | 1.5965781  | 3.2368640  | 0.7370721  |
| C  | 1.6294975  | 3.2839763  | -2.1751492 |
| H  | 1.2424151  | 4.3037230  | -2.1289055 |
| H  | 1.2889034  | 2.8075523  | -3.0946011 |
| H  | 2.7196747  | 3.3171359  | -2.1795981 |
| H  | 1.2652869  | 4.2754300  | 0.6834069  |

|   |           |           |           |
|---|-----------|-----------|-----------|
| H | 2.6840198 | 3.2098669 | 0.8132888 |
| H | 1.1719910 | 2.7657133 | 1.6241232 |

**Scheme 9: 6\* @ RI-TPSSh-D3 (BJ) /def2-TZVPP**  
113

|   |            |            |            |
|---|------------|------------|------------|
| C | 0.6956567  | 0.9720421  | -0.0442224 |
| N | 1.4364881  | 0.8147427  | 1.0112089  |
| C | 1.5415991  | 1.0409720  | -1.2990078 |
| C | 0.8570657  | 0.8153857  | 2.3448461  |
| C | 2.9200706  | 0.6144644  | 0.7443975  |
| C | 2.9672466  | 0.6609553  | -0.7982442 |
| C | 1.4972809  | 2.5197451  | -1.7291912 |
| C | 1.0266456  | -0.0555933 | -2.2613220 |
| C | 0.3461184  | -0.3913889 | 2.8497279  |
| C | 0.7474053  | 2.0320604  | 3.0388555  |
| C | 3.3844504  | -0.7242866 | 1.3064037  |
| C | 3.7461885  | 1.7280447  | 1.3828474  |
| H | 3.7032490  | 1.3887320  | -1.1379579 |
| H | 3.2638654  | -0.3112384 | -1.1849614 |
| H | 1.8217502  | 3.1372970  | -0.8883872 |
| H | 2.1699825  | 2.7185297  | -2.5608461 |
| H | 0.4889180  | 2.8305530  | -1.9989939 |
| N | 0.5001036  | -1.0109009 | -1.5985121 |
| C | 1.2658432  | 0.0633566  | -3.7721712 |
| C | 0.3358629  | -1.6905488 | 2.0648845  |
| C | -0.2517919 | -0.3577477 | 4.1097064  |
| C | 0.1441489  | 2.0019757  | 4.2959928  |
| C | 1.1706684  | 3.3713585  | 2.4631986  |
| H | 4.4547896  | -0.8245429 | 1.1198087  |
| H | 3.2237200  | -0.7719988 | 2.3842230  |
| H | 2.8773951  | -1.5589678 | 0.8299570  |
| H | 3.5777251  | 1.7730306  | 2.4587567  |
| H | 4.8010580  | 1.5050872  | 1.2166770  |
| H | 3.5369127  | 2.7029715  | 0.9450469  |
| C | 0.0435655  | -2.2756078 | -2.0337666 |
| C | 0.4129658  | 1.2226454  | -4.3422749 |
| C | 0.8885989  | -1.1934655 | -4.5692701 |
| C | 2.7609726  | 0.3361895  | -4.0339565 |
| H | 0.9045785  | -1.5498411 | 1.1473443  |
| C | 0.9514266  | -2.8469166 | 2.8612092  |
| C | -1.0926442 | -2.0385450 | 1.6334711  |
| H | -0.6651586 | -1.2700917 | 4.5204078  |
| C | -0.3446527 | 0.8209086  | 4.8323588  |
| H | 0.0431285  | 2.9249609  | 4.8533064  |
| H | 1.6918617  | 3.1906146  | 1.5249995  |
| C | -0.0578116 | 4.2262368  | 2.1293496  |
| C | 2.1160784  | 4.1349492  | 3.3988948  |
| C | 0.9515091  | -3.3549475 | -2.0888789 |
| C | -1.3306830 | -2.4887124 | -2.2608910 |
| H | 0.7905670  | 2.2053566  | -4.0752156 |
| H | 0.4222334  | 1.1511073  | -5.4313785 |
| H | -0.6243311 | 1.1484483  | -4.0112422 |
| H | -0.1689875 | -1.4349854 | -4.4914127 |
| H | 1.1145881  | -0.9995723 | -5.6201890 |
| H | 1.4528844  | -2.0681311 | -4.2588647 |
| H | 3.3730300  | -0.5073109 | -3.7091477 |
| H | 2.9131939  | 0.4659053  | -5.1070477 |
| H | 3.1249778  | 1.2352998  | -3.5379941 |
| H | 0.3923870  | -3.0338657 | 3.7799268  |
| H | 0.9253041  | -3.7649992 | 2.2717398  |
| H | 1.9874191  | -2.6445883 | 3.1363903  |
| H | -1.5210814 | -1.2222245 | 1.0482262  |
| H | -1.0893897 | -2.9382495 | 1.0155426  |
| H | -1.7340117 | -2.2103309 | 2.5001070  |
| H | -0.8154190 | 0.8224938  | 5.8074296  |
| H | -0.6589135 | 4.4128484  | 3.0217730  |
| H | 0.2508574  | 5.1896578  | 1.7172632  |
| H | -0.6916402 | 3.7242857  | 1.3965355  |
| H | 2.9892435  | 3.5406382  | 3.6706455  |

|    |            |            |            |
|----|------------|------------|------------|
| H  | 2.4610236  | 5.0516245  | 2.9163824  |
| H  | 1.6081270  | 4.4201445  | 4.3221647  |
| C  | 0.4731976  | -4.6102452 | -2.4564700 |
| C  | 2.4203539  | -3.2055396 | -1.7343229 |
| C  | -1.7543352 | -3.7619440 | -2.6382788 |
| C  | -2.3580596 | -1.3819688 | -2.1135630 |
| H  | 1.1686489  | -5.4392989 | -2.5161454 |
| C  | -0.8655789 | -4.8201940 | -2.7514344 |
| H  | 2.6087833  | -2.1500754 | -1.5331571 |
| C  | 3.3603042  | -3.6457132 | -2.8647316 |
| C  | 2.7410896  | -3.9935392 | -0.4561696 |
| H  | -2.8047143 | -3.9267871 | -2.8464912 |
| H  | -1.8579671 | -0.5395720 | -1.6206221 |
| C  | -3.5309084 | -1.8261777 | -1.2284754 |
| C  | -2.8869791 | -0.9002368 | -3.4714734 |
| H  | -1.2147591 | -5.8002103 | -3.0504985 |
| H  | 4.4013244  | -3.4967068 | -2.5685778 |
| H  | 3.2303857  | -4.7056943 | -3.0913444 |
| H  | 3.1860014  | -3.0866669 | -3.7848405 |
| H  | 2.0933944  | -3.6917648 | 0.3671131  |
| H  | 2.5928316  | -5.0632315 | -0.6179976 |
| H  | 3.7807637  | -3.8407635 | -0.1564682 |
| H  | -4.1027134 | -2.6239342 | -1.7054372 |
| H  | -3.1816593 | -2.1949907 | -0.2645869 |
| H  | -4.2251993 | -0.9997591 | -1.0545823 |
| H  | -2.0864100 | -0.5317686 | -4.1123436 |
| H  | -3.3851297 | -1.7173042 | -3.9978644 |
| H  | -3.6169697 | -0.0955284 | -3.3441135 |
| H  | -3.8896002 | 2.8979789  | 4.8474751  |
| C  | -3.9190160 | 2.0299482  | 4.2018731  |
| C  | -4.2841423 | -0.3758298 | 3.9041191  |
| C  | -3.4456677 | 1.7780505  | 0.8143379  |
| H  | -3.3055380 | 3.3536474  | -2.1735133 |
| C  | -3.4367112 | 2.9497888  | 1.6553790  |
| Au | -1.2803504 | 1.3735163  | 0.0136179  |
| C  | -3.7545007 | 0.9317859  | 2.0261839  |
| C  | -4.2096744 | 0.7499607  | 4.7170266  |
| C  | -3.6918811 | 2.0835271  | 2.8487754  |
| C  | -4.0631348 | -0.3122223 | 2.5123466  |
| H  | -4.1393475 | -1.1948420 | 1.8928564  |
| C  | -3.4251247 | 1.8828601  | -0.5787198 |
| H  | -3.4604269 | 5.1008537  | 1.7597271  |
| C  | -3.4051613 | 4.2122628  | 1.1447809  |
| H  | -3.6424089 | 1.0543111  | -1.2394175 |
| C  | -3.3383290 | 3.2211837  | -1.0999691 |
| H  | -3.2764945 | 5.3068015  | -0.7191335 |
| H  | -4.5261768 | -1.3305259 | 4.3542805  |
| C  | -3.3247791 | 4.3208118  | -0.2743836 |
| H  | -4.3934441 | 0.6397267  | 5.7785750  |

**Scheme 9: 6<sub>TS</sub> @ RI-TPSSh-D3 (BJ) /def2-TZVPP**  
113

|   |            |            |            |
|---|------------|------------|------------|
| C | 0.8908554  | -0.2997882 | 0.8586536  |
| N | 0.6436674  | -0.1832230 | 2.1305295  |
| C | 1.9869145  | -1.3168141 | 0.6101515  |
| C | -0.2765461 | 0.8370962  | 2.6131954  |
| C | 1.4041906  | -1.1402256 | 3.0343687  |
| C | 2.1734193  | -1.9923480 | 2.0009761  |
| C | 3.2279781  | -0.4886786 | 0.2263198  |
| C | 1.4212545  | -2.3453393 | -0.3923944 |
| C | -1.6409474 | 0.5151235  | 2.7044262  |
| C | 0.2084518  | 2.1351597  | 2.8563631  |
| C | 0.4484267  | -1.9701844 | 3.8849373  |
| C | 2.3386226  | -0.3671078 | 3.9618799  |
| H | 3.2278326  | -2.0600085 | 2.2659601  |
| H | 1.7700314  | -3.0028827 | 1.9888375  |
| H | 3.4302373  | 0.2326487  | 1.0211181  |
| H | 4.1128170  | -1.1120922 | 0.1164351  |
| H | 3.0660185  | 0.0705263  | -0.6943672 |



|   |            |             |            |                                                 |            |            |            |
|---|------------|-------------|------------|-------------------------------------------------|------------|------------|------------|
| N | 0.1502444  | -2.3862437  | -0.2961896 | H                                               | -2.5729116 | -0.3940159 | -1.9766150 |
| C | 2.3551028  | -3.1990377  | -1.2571420 | H                                               | -1.8624180 | 0.3224071  | -3.4354368 |
| C | -2.2101315 | -0.8418516  | 2.3309683  | H                                               | 0.3937897  | -2.5708957 | -4.2627485 |
| C | -2.5173851 | 1.5284887   | 3.0933966  | H                                               | -1.2486195 | -2.4142653 | -4.8799714 |
| C | -0.7163617 | 3.1048433   | 3.2445772  | H                                               | -0.2049381 | -0.9998828 | -4.8171939 |
| C | 1.6552441  | 2.5575334   | 2.6679597  | H                                               | -0.7980385 | 6.0905746  | -0.9878998 |
| H | 1.0398163  | -2.5981253  | 4.5531913  | C                                               | -1.1978786 | 5.0927399  | -0.8596359 |
| H | -0.1859202 | -1.3295937  | 4.4991505  | C                                               | -3.0629846 | 3.6359676  | -0.2948816 |
| H | -0.1775364 | -2.6195667  | 3.2775775  | C                                               | 0.4365732  | 2.2618339  | -2.7202221 |
| H | 1.7784395  | 0.3295354   | 4.5852955  | H                                               | 2.4671392  | 1.6576131  | -4.8647693 |
| H | 2.8366445  | -1.0814155  | 4.6188570  | C                                               | 0.6406448  | 3.6506668  | -2.1262611 |
| H | 3.1061284  | 0.1790379   | 3.4156875  | Au                                              | 0.1786734  | 1.0348280  | -0.5040568 |
| C | -0.7920795 | -3.2351169  | -0.9145023 | C                                               | -1.0683019 | 2.6916116  | -1.1384728 |
| C | 3.0039394  | -2.3111210  | -2.3442141 | C                                               | -2.4838916 | 4.8963838  | -0.3313219 |
| C | 1.6491610  | -4.3495089  | -1.9879727 | C                                               | -0.4987833 | 3.9759107  | -1.2633340 |
| C | 3.4458094  | -3.8306420  | -0.3684939 | C                                               | -2.3739374 | 2.4935516  | -0.7428954 |
| H | -1.3844508 | -1.5331159  | 2.1765690  | H                                               | -2.8439033 | 1.5226849  | -0.7212815 |
| C | -3.1189157 | -1.3944794  | 3.4355459  | C                                               | 1.0093299  | 1.5307729  | -3.2910827 |
| C | -2.9566991 | -0.7700260  | 0.9933881  | H                                               | 1.6745171  | 5.3851113  | -2.8760014 |
| H | -3.5751874 | 1.3097658   | 3.1659513  | C                                               | 1.5359676  | 4.3133307  | -2.9393682 |
| C | -2.0639119 | 2.8085359   | 3.3697519  | H                                               | 0.7976770  | 0.4846520  | -3.4540973 |
| H | -0.3702267 | 4.1127447   | 3.4366433  | C                                               | 1.9470202  | 2.2088178  | -4.0912482 |
| H | 2.2354232  | 1.6798992   | 2.3864242  | H                                               | 2.9413496  | 4.0451552  | -4.5479487 |
| C | 1.7934866  | 3.5731195   | 1.5255843  | H                                               | -4.0676492 | 3.5171230  | 0.0909955  |
| C | 2.2513551  | 3.1398327   | 3.9573073  | C                                               | 2.2188507  | 3.5579940  | -3.9055492 |
| C | -1.2272795 | -4.3842479  | -0.2222002 | H                                               | -3.0527258 | 5.7502613  | 0.0142651  |
| C | -1.3994381 | -2.8552199  | -2.1269307 | <b>Scheme 9: 7 @ RI-TPSSh-D3(BJ)/def2-TZVPP</b> |            |            |            |
| H | 3.7104004  | -1.5884471  | -1.9456920 | 113                                             |            |            |            |
| H | 3.5452850  | -2.9574837  | -3.0378942 | Au                                              | 0.5652977  | 0.8636761  | 0.6485143  |
| H | 2.2417885  | -1.7753700  | -2.9125534 | N                                               | 1.1975450  | -1.2189380 | 0.0522753  |
| H | 0.9177485  | -3.9968997  | -2.7107473 | C                                               | -1.1979013 | -0.2065659 | 0.2903659  |
| H | 2.4099271  | -4.9195255  | -2.5260209 | C                                               | 0.0006480  | 2.5859172  | 1.5825598  |
| H | 1.1416218  | -5.0248977  | -1.3042741 | C                                               | 2.3902993  | 1.8567611  | 0.7462569  |
| H | 3.0063068  | -4.5239389  | 0.3513267  | C                                               | 0.3314308  | -2.1767224 | 0.1062763  |
| H | 4.1314804  | -4.3968546  | -1.0013457 | C                                               | 2.5946803  | -1.4141242 | -0.1882030 |
| H | 4.0336940  | -3.03956719 | 0.1795020  | N                                               | -2.2749273 | 0.0219089  | -0.3990448 |
| H | -3.9823564 | -0.7473176  | 3.5984653  | C                                               | -1.0616118 | -1.7029488 | 0.5366643  |
| H | -3.4997798 | -2.3781013  | 3.1575770  | C                                               | -1.3106823 | 2.9221184  | 1.8607285  |
| H | -2.5880375 | -1.4879302  | 4.3842556  | C                                               | 1.0592711  | 3.3860971  | 2.0477272  |
| H | -2.2724512 | -0.4648268  | 0.2000863  | C                                               | 2.3809981  | 2.9968753  | 1.5743925  |
| H | -3.3561506 | -1.7505933  | 0.7285600  | C                                               | 3.5562074  | 1.5346630  | 0.0659006  |
| H | -3.7856393 | -0.0597266  | 1.0407064  | C                                               | 0.5807095  | -3.6817188 | -0.1630855 |
| H | -2.7631968 | 3.5794634   | 3.6688899  | C                                               | 3.0650832  | -1.4424239 | -1.5097754 |
| H | 1.2031594  | 4.4699521   | 1.7221626  | C                                               | 3.4527541  | -1.4363184 | 0.9231716  |
| H | 2.8382337  | 3.8702073   | 1.4125261  | C                                               | -2.8124346 | -1.2327510 | -1.1009435 |
| H | 1.4539530  | 3.1493335   | 0.5791318  | C                                               | -2.9179645 | 1.3125535  | -0.5515911 |
| H | 2.1502019  | 2.4572498   | 4.8013459  | C                                               | -2.3290668 | -2.2995687 | -0.1235375 |
| H | 3.3119398  | 3.3571912   | 3.8155345  | C                                               | -1.1431577 | -1.8116033 | 2.0890607  |
| H | 1.7552053  | 4.0745309   | 4.2257890  | H                                               | -2.1242801 | 2.3335795  | 1.4764711  |
| C | -2.2326420 | -5.1623857  | -0.7903275 | C                                               | -1.5916508 | 4.0520885  | 2.6310533  |
| C | -0.6411706 | -4.7909668  | 1.1180749  | C                                               | 0.7637009  | 4.5057490  | 2.8262581  |
| C | -2.4065565 | -3.6652673  | -2.6484647 | C                                               | 3.5549369  | 3.7163213  | 1.7935788  |
| C | -0.9997693 | -1.5995980  | -2.8789159 | H                                               | 3.5958829  | 0.7116820  | -0.6290811 |
| H | -2.5589286 | -6.0578947  | -0.2742120 | C                                               | 4.7236915  | 2.2754175  | 0.2679730  |
| C | -2.8223254 | -4.8173066  | -1.9980172 | C                                               | 0.1469718  | -4.0073579 | -1.6145905 |
| H | 0.1079757  | -4.0450268  | 1.3894157  | C                                               | -0.2324649 | -4.5639007 | 0.8103596  |
| C | 0.0484334  | -6.1614879  | 1.0724725  | C                                               | 2.0345207  | -4.1863000 | -0.0451263 |
| C | -1.7210838 | -4.7886832  | 2.2076719  | C                                               | 2.1458961  | -1.2002298 | -2.6925899 |
| H | -2.8712795 | -3.3871058  | -3.5872959 | C                                               | 4.4355417  | -1.6193955 | -1.6991181 |
| H | -0.1993823 | -1.1161430  | -2.3096138 | C                                               | 2.9455649  | -1.1943821 | 2.3364066  |
| C | -2.1734409 | -0.6144171  | -2.9667122 | C                                               | 4.8103694  | -1.6305283 | 0.6767015  |
| C | -0.4784230 | -1.9165996  | -4.2878165 | C                                               | -2.0831829 | -1.3116503 | -2.4434645 |
| H | -3.6012382 | -5.4364711  | -2.4243546 | C                                               | -4.3116433 | -1.2281893 | -1.3412657 |
| H | 0.4589368  | -6.4115637  | 2.0537293  | C                                               | -2.4348881 | 2.2658997  | -1.4572281 |
| H | -0.6620995 | -6.9444127  | 0.7998473  | C                                               | -4.0196624 | 1.5555601  | 0.2946233  |
| H | 0.8633216  | -6.1870369  | 0.3480959  | H                                               | -2.1779316 | -3.2470751 | -0.6250014 |
| H | -2.2215424 | -3.8224166  | 2.2610502  | H                                               | -3.0843312 | -2.4553824 | 0.6497275  |
| H | -2.4812000 | -5.5453649  | 2.0031404  | H                                               | -0.2583331 | -1.3767916 | 2.5521177  |
| H | -1.2854485 | -5.0101489  | 3.1850823  |                                                 |            |            |            |
| H | -2.9855164 | -1.0332482  | -3.5642969 |                                                 |            |            |            |

|   |            |            |            |                                                                    |            |            |             |
|---|------------|------------|------------|--------------------------------------------------------------------|------------|------------|-------------|
| H | -1.2432629 | -2.8475163 | 2.4021059  | H                                                                  | -4.5121167 | 0.3141582  | 3.5024922   |
| H | -2.0186860 | -1.2605485 | 2.4353524  | H                                                                  | -4.4725264 | 2.0051975  | 2.9944190   |
| H | -2.6226578 | 4.3102123  | 2.8399531  | H                                                                  | -0.7698729 | 5.7087645  | 3.7238202   |
| C | -0.5546957 | 4.8350416  | 3.1214364  | <b>H2O @ RIJCOSX-TPSSH-D3 (BJ) /def2-TZVPP + C-PCM</b>             |            |            |             |
| H | 1.5682417  | 5.1312616  | 3.1935879  | 3                                                                  |            |            |             |
| H | 3.5475748  | 4.5820485  | 2.4449758  | O                                                                  | -0.0250421 | -0.0000000 | -0.1694490  |
| C | 4.7317048  | 3.3459249  | 1.1523568  | H                                                                  | 0.1881183  | 0.0000000  | 0.7719108   |
| H | 5.6241054  | 2.0015159  | -0.2682861 | H                                                                  | 0.8369240  | 0.0000000  | -0.6024618  |
| H | -0.8975846 | -3.7950566 | -1.8252438 | <b>Biphenylene @ RIJCOSX-TPSSH-D3 (BJ) /def2-TZVPP + C-PCM</b>     |            |            |             |
| H | 0.3065592  | -5.0756677 | -1.7708629 | 20                                                                 |            |            |             |
| H | 0.7580143  | -3.4697838 | -2.3359362 | H                                                                  | 3.1822368  | 0.0108748  | -0.00000658 |
| H | 0.1453129  | -4.4736892 | 1.8296824  | H                                                                  | 3.4259430  | 2.4979109  | -0.00000011 |
| H | -0.1000681 | -5.6020998 | 0.5035274  | H                                                                  | 0.8448414  | -3.0680996 | -0.00000843 |
| H | -1.3002275 | -4.3598557 | 0.8158276  | H                                                                  | -1.4851294 | -3.9712264 | -0.00000288 |
| H | 2.6829344  | -3.8095403 | -0.8298228 | H                                                                  | 1.4851325  | 3.9712277  | 0.00000205  |
| H | 1.9918442  | -5.2734212 | -0.1403553 | H                                                                  | -3.4259449 | -2.4979125 | 0.00000611  |
| H | 2.4840640  | -3.9544968 | 0.9155780  | H                                                                  | -0.8448379 | 3.0681020  | 0.00000018  |
| H | 1.1311583  | -1.4599248 | -2.3860496 | C                                                                  | 2.3070514  | 0.6485165  | 0.00000818  |
| C | 2.4969670  | -2.0484919 | -3.9181425 | C                                                                  | 2.4346030  | 2.0599209  | 0.00000371  |
| C | 2.1353808  | 0.2930235  | -3.0529052 | C                                                                  | -0.0042372 | -2.3960221 | 0.00000679  |
| H | 4.8326093  | -1.6580587 | -2.7051076 | C                                                                  | 1.0221015  | 0.1707873  | 0.00000536  |
| C | 5.2981760  | -1.7418625 | -0.6180009 | C                                                                  | 0.1108515  | -1.0300311 | 0.00000394  |
| H | 2.0297543  | -0.6004183 | 2.2454188  | C                                                                  | 1.3292346  | 2.8985925  | -0.00000580 |
| C | 3.9284287  | -0.3604504 | 3.1656856  | C                                                                  | -1.3292336 | -2.8985911 | 0.00000367  |
| C | 2.5830357  | -2.4841108 | 3.0851884  | C                                                                  | -0.1108523 | 1.0300308  | -0.00000143 |
| H | 5.4995693  | -1.6694239 | 1.5096537  | C                                                                  | 0.0042389  | 2.3960217  | -0.00001197 |
| H | -2.3537672 | -0.4715126 | -3.0800690 | C                                                                  | -1.0221032 | -0.1707887 | -0.00000303 |
| H | -2.3702420 | -2.2305396 | -2.9562512 | C                                                                  | -2.4346050 | -2.0599218 | -0.00000236 |
| H | -1.0005138 | -1.3085417 | -2.3100835 | C                                                                  | -2.3070532 | -0.6485174 | -0.00000912 |
| H | -4.8839333 | -1.3278505 | -0.4233091 | H                                                                  | -3.1822377 | -0.0108743 | 0.00001193  |
| H | -4.5550912 | -2.0773878 | -1.9815770 | <b>1 water complex @ RIJCOSX-TPSSH-D3 (BJ) /def2-TZVPP + C-PCM</b> |            |            |             |
| H | -4.6227670 | -0.3200471 | -1.8588097 | 76                                                                 |            |            |             |
| C | -1.2283806 | 2.0676399  | -2.3546469 | N                                                                  | -1.7574355 | 0.3364677  | -0.8110312  |
| C | -3.1108798 | 3.4873030  | -1.5163993 | C                                                                  | -0.5499805 | -0.1914392 | -0.4869495  |
| C | -4.5068255 | 0.5740796  | 1.3524675  | N                                                                  | -0.1809416 | -0.9251132 | -1.5676526  |
| C | -4.6475612 | 2.7944564  | 0.1913538  | C                                                                  | -1.1469161 | -0.8552614 | -2.5576877  |
| H | 5.6415726  | 3.9080090  | 1.3222359  | C                                                                  | -2.1393837 | -0.0690380 | -2.0806935  |
| H | 3.4473432  | -1.7402228 | -4.3574822 | Au                                                                 | 0.5548973  | 0.1526407  | 1.0980382   |
| H | 1.7312664  | -1.9278845 | -4.6871323 | H                                                                  | -1.0375995 | -1.3798486 | -3.4895870  |
| H | 2.5727301  | -3.1092037 | -3.6706261 | H                                                                  | -3.0793011 | 0.2271837  | -2.5084817  |
| H | 1.8237724  | 0.9042427  | -2.2046612 | C                                                                  | -2.5824793 | 1.1315134  | 0.0701539   |
| H | 1.4508168  | 0.4783313  | -3.8836630 | C                                                                  | -3.2974724 | 0.4706610  | 1.0782069   |
| H | 3.1324261  | 0.6227787  | -3.3518020 | C                                                                  | -4.0999206 | 1.2521058  | 1.9122064   |
| H | 6.3572180  | -1.8918878 | -0.7860220 | C                                                                  | -4.1965087 | 2.6235280  | 1.7320040   |
| H | 4.8241900  | -0.9307006 | 3.4208913  | C                                                                  | -3.4882138 | 3.2465823  | 0.7121255   |
| H | 3.4533890  | -0.0640246 | 4.1026359  | C                                                                  | -2.6602725 | 2.5168027  | -0.1417242  |
| H | 4.2292295  | 0.5405924  | 2.6313715  | C                                                                  | -3.2685397 | -1.0329282 | 1.2764280   |
| H | 1.7549125  | -3.0137356 | 2.6118537  | H                                                                  | -4.6625396 | 0.7724239  | 2.7041719   |
| H | 2.2855654  | -2.2484713 | 4.1091845  | H                                                                  | -4.8283400 | 3.2114877  | 2.3871332   |
| H | 3.4377036  | -3.1628488 | 3.1300282  | H                                                                  | -3.5736425 | 4.3178827  | 0.5807970   |
| H | -0.7742470 | 1.1024384  | -2.1198611 | C                                                                  | -1.9042162 | 3.2133058  | -1.2575655  |
| C | -0.1736589 | 3.1582153  | -2.1120147 | C                                                                  | 0.9488657  | -1.8247947 | -1.6102869  |
| C | -1.6394004 | 2.0675097  | -3.8351346 | C                                                                  | 0.6916309  | -3.1824198 | -1.3712569  |
| H | -2.7614285 | 4.2453737  | -2.2054861 | C                                                                  | 1.7704675  | -4.0638894 | -1.4380246  |
| C | -4.2030659 | 3.7524743  | -0.7086459 | C                                                                  | 3.0494739  | -3.6051058 | -1.7241938  |
| H | -4.0380023 | -0.3934443 | 1.1684018  | C                                                                  | 3.2709373  | -2.2549531 | -1.9525146  |
| C | -6.0290700 | 0.3822196  | 1.2955408  | C                                                                  | 2.2249631  | -1.3304290 | -1.9024316  |
| C | -4.0936025 | 1.0063651  | 2.7687252  | C                                                                  | -0.6951769 | -3.7117114 | -1.0616756  |
| H | -5.4890642 | 3.0154693  | 0.8352844  | H                                                                  | 1.6044329  | -5.1197608 | -1.2605130  |
| H | -0.5647428 | 4.1416409  | -2.3787766 | H                                                                  | 3.8768820  | -4.3031462 | -1.7711276  |
| H | 0.7051362  | 2.9730861  | -2.7312290 | H                                                                  | 4.2704189  | -1.9074749 | -2.1810143  |
| H | 0.1381661  | 3.1917544  | -1.0686094 |                                                                    |            |            |             |
| H | -2.4205964 | 1.3359839  | -4.0494285 |                                                                    |            |            |             |
| H | -0.7768076 | 1.8479819  | -4.4672017 |                                                                    |            |            |             |
| H | -2.0231319 | 3.0479924  | -4.1240830 |                                                                    |            |            |             |
| H | -4.7042868 | 4.7100843  | -0.7722370 |                                                                    |            |            |             |
| H | -6.5499612 | 1.2839545  | 1.6216874  |                                                                    |            |            |             |
| H | -6.3281672 | -0.4262153 | 1.9655512  |                                                                    |            |            |             |
| H | -6.3750193 | 0.1457521  | 0.2885371  |                                                                    |            |            |             |
| H | -3.0108462 | 1.0240571  | 2.8936253  |                                                                    |            |            |             |

|    |            |            |            |    |            |            |            |
|----|------------|------------|------------|----|------------|------------|------------|
| C  | 2.5044541  | 0.1306277  | -2.1866443 | H  | 0.8248496  | -4.7366926 | 1.7351827  |
| C  | -4.6551297 | -1.6352487 | 1.0006638  | C  | 2.0807490  | -2.5486585 | 0.7062317  |
| C  | -2.7892241 | -1.4007367 | 2.6870962  | C  | 0.7867753  | 2.4232882  | -0.8728213 |
| H  | -2.5682949 | -1.4669934 | 0.5633693  | C  | -0.2542173 | 3.2698766  | -1.2706784 |
| H  | -1.0486006 | 2.5892156  | -1.5238914 | C  | -0.1286847 | 4.6230497  | -0.9530121 |
| C  | -2.7928508 | 3.3778615  | -2.5024829 | C  | 0.9867625  | 5.0949071  | -0.2708006 |
| C  | -1.3761635 | 4.5897561  | -0.8342718 | C  | 1.9987616  | 4.2236713  | 0.1133723  |
| C  | 2.8507522  | 0.3270647  | -3.6701943 | C  | 1.9197552  | 2.8607450  | -0.1772197 |
| C  | 3.6298412  | 0.6595205  | -1.2903282 | C  | -1.4926375 | 2.7514603  | -1.9752807 |
| H  | 1.6035344  | 0.7050220  | -1.9685185 | H  | -0.9155090 | 5.3112457  | -1.2376203 |
| C  | -0.7214058 | -4.4578769 | 0.2789483  | H  | 1.0653226  | 6.1489376  | -0.0316992 |
| C  | -1.1973456 | -4.6008230 | -2.2088727 | H  | 2.8590204  | 4.6030224  | 0.6516178  |
| H  | -1.3785830 | -2.8668685 | -0.9763002 | C  | 3.0133616  | 1.9117818  | 0.2722008  |
| H  | -2.1933175 | 5.3101049  | -0.7447519 | C  | 2.3172737  | -2.2037563 | 2.1822465  |
| H  | -0.8496144 | 4.5452535  | 0.1180890  | H  | 2.2460843  | -1.6399408 | 0.1261224  |
| H  | -0.6841395 | 4.9662890  | -1.5869460 | C  | 3.0849997  | -3.6000965 | 0.2145112  |
| H  | -2.7543985 | -2.4871265 | 2.7974057  | H  | -1.3280906 | 1.7036897  | -2.2308723 |
| H  | -3.4692156 | -1.0063181 | 3.4453165  | C  | -1.7638573 | 3.5093176  | -3.2804294 |
| H  | -1.7922417 | -0.9972333 | 2.8787046  | C  | -2.7058992 | 2.8137396  | -1.0352870 |
| H  | -4.9769521 | -1.4292877 | -0.0227422 | H  | 2.7587739  | 0.9077295  | -0.0687970 |
| H  | -5.4002735 | -1.2181506 | 1.6821093  | C  | 4.3641233  | 2.2833804  | -0.3540943 |
| H  | -4.6308019 | -2.7178883 | 1.1481218  | C  | 3.1033391  | 1.8706360  | 1.8035788  |
| H  | -3.1761284 | 2.4245442  | -2.8669879 | C  | -3.0327156 | -2.7429515 | -2.6200152 |
| H  | -2.2230109 | 3.8495291  | -3.3068184 | H  | -1.9461985 | -1.0615399 | -1.8784689 |
| H  | -3.6464746 | 4.0191060  | -2.2678994 | C  | -3.6501444 | -1.3166829 | -0.6207573 |
| H  | -0.0768404 | -5.3390111 | 0.2540500  | H  | -3.6196457 | -3.5898561 | -2.2570689 |
| H  | -1.7379761 | -4.7893289 | 0.5017898  | H  | -3.6778909 | -2.1329798 | -3.2567297 |
| H  | -0.3837320 | -3.8088052 | 1.0892489  | H  | -2.2132116 | -3.1311982 | -3.2286094 |
| H  | 3.3748216  | 0.5426281  | -0.2358369 | H  | -4.3017061 | -0.7108189 | -1.2550957 |
| H  | 4.5652412  | 0.1283958  | -1.4797051 | H  | -4.2496503 | -2.1136636 | -0.1751234 |
| H  | 3.7965271  | 1.7193857  | -1.4847596 | H  | -3.2678018 | -0.6866494 | 0.1849598  |
| H  | 3.7481629  | -0.2386784 | -3.9326006 | H  | -2.9162712 | 3.8457671  | -0.7446033 |
| H  | 2.0355116  | -0.0095315 | -4.3141435 | H  | -3.5898469 | 2.4098413  | -1.5334739 |
| H  | 3.0433189  | 1.3829613  | -3.8743545 | H  | -2.5260333 | 2.2319823  | -0.1285647 |
| H  | -1.2142019 | -4.0493061 | -3.1514205 | H  | 4.3043327  | 2.2788478  | -1.4445948 |
| H  | -2.2080070 | -4.9573532 | -1.9982059 | H  | 5.1282706  | 1.5664991  | -0.0544100 |
| H  | -0.5481109 | -5.4699477 | -2.3375074 | H  | 4.6830737  | 3.2774507  | -0.0326219 |
| F  | 3.5981583  | 5.2327065  | 1.9204215  | H  | -2.6280511 | 3.0746227  | -3.7876899 |
| F  | 3.8824973  | 4.1723792  | -0.5286569 | H  | -0.9041906 | 3.4539166  | -3.9518179 |
| Sb | 2.5150549  | 4.1623788  | 0.7909768  | H  | -1.9813788 | 4.5627972  | -3.0893873 |
| F  | 1.1648414  | 4.0572056  | 2.1276591  | H  | 2.9387184  | -3.8170951 | -0.8456297 |
| F  | 3.3056383  | 2.5895566  | 1.5877658  | H  | 2.9791239  | -4.5334779 | 0.7721117  |
| F  | 1.4534410  | 3.0620387  | -0.3282328 | H  | 4.1055091  | -3.2362756 | 0.3558014  |
| F  | 1.7444158  | 5.7269896  | 0.0465417  | H  | 3.3395305  | -1.8445444 | 2.3222004  |
| O  | 1.8252208  | 0.6398268  | 2.7087795  | H  | 2.1745278  | -3.0812483 | 2.8166816  |
| H  | 2.4145220  | 1.3692133  | 2.4082870  | H  | 1.6270203  | -1.4270112 | 2.5159903  |
| H  | 2.4053621  | -0.0965357 | 2.9513957  | H  | 2.1482427  | 1.5719535  | 2.2407777  |
|    |            |            |            | H  | 3.8640026  | 1.1512469  | 2.1143816  |
|    |            |            |            | H  | 3.3733887  | 2.8499587  | 2.2053499  |
|    |            |            |            | Sb | -2.1343701 | -0.8033999 | 4.5210071  |
|    |            |            |            | F  | -0.4019088 | -1.5547586 | 4.4015091  |
|    |            |            |            | F  | -3.8161631 | 0.0582941  | 4.5361840  |
|    |            |            |            | F  | -2.7570889 | -2.2187731 | 5.6024530  |
|    |            |            |            | F  | -1.5911711 | 0.2272407  | 6.0081542  |
|    |            |            |            | F  | -2.6190181 | -1.6932458 | 2.9220990  |

**1 SbF6 complex @ RIJCOSX-TPSSh-D3 (BJ)/def2-TZVPP + C-PCM**  
73

|    |            |            |            |
|----|------------|------------|------------|
| N  | 0.6715191  | 1.0179172  | -1.1661589 |
| C  | 0.1272523  | 0.1206303  | -0.3163999 |
| N  | 0.2224709  | -1.0741495 | -0.9411919 |
| C  | 0.8266083  | -0.9294351 | -2.1785628 |
| C  | 1.1105580  | 0.3890186  | -2.3206265 |
| Au | -0.6342963 | 0.4222262  | 1.4520802  |
| H  | 0.9932739  | -1.7707640 | -2.8273014 |
| H  | 1.5766144  | 0.9382902  | -3.1192095 |
| F  | -1.4784758 | 0.6915934  | 3.3894702  |
| C  | -0.2342969 | -2.3051660 | -0.3472336 |
| C  | -1.5550349 | -2.7029878 | -0.5814163 |
| C  | -1.9863633 | -3.8713441 | 0.0480571  |
| C  | -1.1337096 | -4.5928012 | 0.8742274  |
| C  | 0.1722732  | -4.1672170 | 1.0841878  |
| C  | 0.6551184  | -3.0093407 | 0.4724772  |
| C  | -2.5002547 | -1.8999435 | -1.4537591 |
| H  | -3.0042270 | -4.2104329 | -0.1008406 |
| H  | -1.4913701 | -5.4916772 | 1.3617504  |

**Scheme 10: 1\* @ RIJCOSX-TPSSh-D3 (BJ)/def2-TZVPP + C-PCM**  
93

|    |            |            |            |
|----|------------|------------|------------|
| N  | -3.9953477 | -2.6746583 | -1.5885918 |
| C  | -2.6600052 | -2.7541721 | -1.3988711 |
| N  | -2.2878059 | -3.9253211 | -1.9635950 |
| C  | -3.3856468 | -4.5794928 | -2.4982625 |
| C  | -4.4625528 | -3.7885531 | -2.2659034 |
| Au | -1.4945246 | -1.4242657 | -0.4561149 |
| H  | -3.2964327 | -5.5378341 | -2.9769723 |
| H  | -5.5028120 | -3.9075042 | -2.5112828 |
| H  | 4.3065605  | -3.8855883 | 0.9443150  |
| H  | 4.2259414  | -2.7286464 | -1.1991962 |

|   |            |            |            |    |            |            |            |
|---|------------|------------|------------|----|------------|------------|------------|
| C | 1.5592150  | -1.3302236 | 0.2369625  | H  | -0.2642653 | -4.9959885 | -5.6217930 |
| C | 0.3884056  | -1.2542775 | 1.9539981  | H  | -1.8801618 | -4.9461453 | -4.9060212 |
| C | -1.3739059 | 0.1152535  | 2.7483446  | H  | -1.4201716 | -3.7533931 | -6.1301102 |
| H | -0.3577117 | -1.3832648 | 3.9721140  | H  | -2.2435657 | -7.3202137 | -0.4458614 |
| C | 3.4747020  | -2.5002080 | -0.4529739 | H  | -2.5451222 | -7.1165173 | 1.2891405  |
| C | 1.5991908  | -2.0020821 | 1.4848369  | H  | -0.9164466 | -7.4997848 | 0.7105194  |
| C | -0.5834861 | 0.4540924  | 0.4401368  | F  | 0.2943791  | 0.2184003  | -2.7057734 |
| C | 3.5198161  | -3.1612582 | 0.7704856  | F  | 2.4157406  | 1.0061183  | -4.1591838 |
| C | -0.4243190 | -0.9202531 | 2.9961275  | Sb | 1.0038791  | 1.9003914  | -3.2495376 |
| C | 2.4767901  | -1.5494859 | -0.7586183 | F  | -0.4117577 | 2.7750551  | -2.3203127 |
| H | 2.6209357  | -3.4496569 | 2.7337346  | F  | -0.0555276 | 1.8420715  | -4.8287133 |
| C | 2.5705467  | -2.9251915 | 1.7882558  | F  | 1.7046299  | 3.5863922  | -3.7789631 |
| H | -2.1792096 | 1.5641086  | 1.4066693  | F  | 2.0561154  | 1.9505770  | -1.6631672 |
| H | 2.4494581  | -1.0486310 | -1.7158904 |    |            |            |            |
| H | -0.5406784 | 1.0953412  | -0.4300465 |    |            |            |            |
| C | 0.3172954  | -0.5896325 | 0.6745085  |    |            |            |            |
| C | -1.4522908 | 0.7738312  | 1.5425882  |    |            |            |            |
| H | -2.0503813 | 0.4007260  | 3.5442680  |    |            |            |            |
| C | -4.7881803 | -1.5749525 | -1.0989892 | H  | 5.1857459  | -1.4518540 | 1.5297436  |
| C | -5.2962544 | -1.6586428 | 0.2030602  | H  | 4.7764876  | -3.7632208 | 0.6901928  |
| C | -6.0127774 | -0.5595958 | 0.6784859  | H  | 5.0550605  | 1.7810494  | 1.4765605  |
| C | -6.2082423 | 0.5624596  | -0.1179142 | H  | 4.4514505  | 4.0264732  | 0.5811638  |
| C | -5.6919824 | 0.6098346  | -1.4069325 | H  | 3.0776067  | -4.1968647 | -1.0317590 |
| C | -4.9662617 | -0.4626080 | -1.9287152 | H  | 2.7034271  | 4.2755460  | -1.1284962 |
| C | -5.0574436 | -2.8647013 | 1.0907236  | H  | 1.6450998  | -2.3674581 | -1.9107534 |
| H | -6.4142380 | -0.5819001 | 1.6840069  | C  | 4.3735740  | -1.6526871 | 0.8423534  |
| H | -6.7649901 | 1.4074879  | 0.2698808  | C  | 4.1600394  | -2.9466195 | 0.3355966  |
| H | -5.8460220 | 1.4924458  | -2.0160644 | C  | 4.2228395  | 1.8960099  | 0.7933541  |
| C | -4.3796337 | -0.3891953 | -3.3240957 | C  | 3.5365145  | -0.6509551 | 0.3980721  |
| C | -0.9416247 | -4.4398063 | -1.9062992 | C  | 3.4707424  | 0.8161265  | 0.3817141  |
| C | -0.5675070 | -5.1620024 | -0.7669234 | C  | 3.2051724  | -3.1942345 | -0.6423108 |
| C | 0.7416761  | -5.6448615 | -0.7194353 | C  | 3.8992513  | 3.1537540  | 0.2554951  |
| C | 1.6241938  | -5.4118830 | -1.7646175 | C  | 2.5186741  | -0.9410130 | -0.5334693 |
| C | 1.2220970  | -4.6827628 | -2.8777130 | C  | 2.3755827  | -2.1704724 | -1.1396281 |
| C | -0.0727036 | -4.1729654 | -2.9737349 | C  | 2.4265769  | 0.9943238  | -0.5495302 |
| C | -1.5237352 | -5.4346942 | 0.3784459  | C  | 2.9165202  | 3.2969267  | -0.7161483 |
| H | 1.0702735  | -6.2036677 | 0.1485552  | C  | 2.1726595  | 2.1949127  | -1.1793385 |
| H | 2.6379654  | -5.7891778 | -1.7075865 | Au | 0.5740176  | -0.0545421 | -0.2722029 |
| H | 1.9285614  | -4.4959548 | -3.6761308 | H  | 1.4167177  | 2.3092754  | -1.9433869 |
| C | -0.5210524 | -3.3841136 | -4.1894443 | C  | -1.3761252 | -0.1748358 | 0.2450243  |
| C | -6.3720792 | -3.4367203 | 1.6359956  | N  | -2.2659407 | 0.8363886  | 0.3337036  |
| C | -4.0933682 | -2.5083464 | 2.2306357  | C  | -3.4667568 | 0.3853048  | 0.8564913  |
| H | -4.5852978 | -3.6441163 | 0.4904969  | C  | -3.3150627 | -0.9431882 | 1.0888956  |
| H | -3.9005246 | -1.3442211 | -3.5446626 | N  | -2.0237905 | -1.2665140 | 0.7072458  |
| C | -5.4704859 | -0.1633814 | -4.3784193 | H  | -3.9931783 | -1.6809852 | 1.4787834  |
| C | -3.3000077 | 0.6980089  | -3.3976822 | H  | -4.3003439 | 1.0460306  | 1.0148544  |
| C | -1.0587761 | -4.3302786 | -5.2757643 | C  | -1.3983585 | -2.5658123 | 0.7400725  |
| C | 0.5906386  | -2.4991727 | -4.7603965 | C  | -1.5502567 | -3.3881705 | -0.3831073 |
| H | -1.3385187 | -2.7291532 | -3.8788853 | C  | -0.8500671 | -4.5949331 | -0.3864425 |
| C | -0.9818381 | -4.8812007 | 1.7019082  | C  | -0.0528120 | -4.9585829 | 0.6922904  |
| C | -1.8254259 | -6.9359635 | 0.4868705  | C  | 0.0618331  | -4.1246532 | 1.7970254  |
| H | -2.4644262 | -4.9229795 | 0.1729453  | C  | -0.6066655 | -2.8998946 | 1.8449769  |
| H | -3.7258530 | 1.6842575  | -3.1968186 | C  | -2.3873112 | -2.9649240 | -1.5750303 |
| H | -2.5106004 | 0.5121513  | -2.6680782 | H  | -0.9216167 | -5.2496081 | -1.2464406 |
| H | -2.8503105 | 0.7173362  | -4.3921979 | H  | 0.4869516  | -5.8975871 | 0.6692131  |
| H | -3.8975248 | -3.3870057 | 2.8493560  | H  | 0.6876824  | -4.4211815 | 2.6301572  |
| H | -4.5167979 | -1.7258077 | 2.8653685  | C  | -0.4539936 | -1.9873609 | 3.0478572  |
| H | -3.1425808 | -2.1465798 | 1.8349524  | C  | -1.9270641 | 2.1976426  | -0.0006190 |
| H | -7.0494850 | -3.7067956 | 0.8234469  | C  | -2.1687076 | 2.6456354  | -1.3061849 |
| H | -6.8803457 | -2.7147254 | 2.2796763  | C  | -1.8177071 | 3.9648838  | -1.5945816 |
| H | -6.1685709 | -4.3307398 | 2.2298931  | C  | -1.2441987 | 4.7814477  | -0.6262667 |
| H | -6.2235012 | -0.9539380 | -4.3413604 | C  | -0.9893482 | 4.2922515  | 0.6480367  |
| H | -5.0266984 | -0.1548869 | -5.3763864 | C  | -1.3179708 | 2.9788388  | 0.9877673  |
| H | -5.9733901 | 0.7943934  | -4.2251635 | C  | -2.7813404 | 1.7387593  | -2.3570823 |
| H | -0.0352599 | -5.3554873 | 1.9701351  | H  | -1.9865161 | 4.3556473  | -2.5896521 |
| H | -1.6973151 | -5.0699225 | 2.5051233  | H  | -0.9781461 | 5.8020725  | -0.8743379 |
| H | -0.8176792 | -3.8047231 | 1.6321044  | H  | -0.5207260 | 4.9308914  | 1.3868968  |
| H | 1.0233670  | -1.8597233 | -3.9915634 | C  | -0.9995229 | 2.4367605  | 2.3679349  |
| H | 1.3877146  | -3.0988914 | -5.2054811 | H  | -3.0085611 | -2.1201142 | -1.2723529 |
| H | 0.1821641  | -1.8587152 | -5.5450290 | C  | -3.3300724 | -4.0770405 | -2.0487679 |

**1<sub>TS</sub> @ RIJCOSX-TPSSh-D3 (BJ) /def2-TZVPP + C-PCM**

93



|    |            |            |            |    |            |            |            |
|----|------------|------------|------------|----|------------|------------|------------|
| 96 |            |            |            | H  | 1.4453445  | 3.6287815  | 4.0237502  |
|    |            |            |            | H  | 1.3757513  | 4.3888581  | 2.4248726  |
| C  | -1.8697428 | 1.6774050  | -0.5516564 | H  | 2.5472581  | 3.0975402  | 2.7416162  |
| C  | -0.9406395 | 2.6754156  | -0.7855911 | H  | -1.6756037 | 2.1943795  | 2.4068862  |
| C  | -1.3777377 | 3.9477348  | -1.1640589 | H  | -1.1086030 | 3.1624517  | 3.7725188  |
| C  | -2.7342607 | 4.2036845  | -1.3207456 | H  | -1.0901669 | 3.8422622  | 2.1412588  |
| C  | -3.6665119 | 3.1947453  | -1.0966542 | H  | 3.9202446  | -2.6803245 | 3.8141395  |
| C  | -3.2501497 | 1.9228634  | -0.7003886 | H  | 4.3068710  | -1.4805001 | 2.5730932  |
| H  | -0.6498485 | 4.7314085  | -1.3331063 | H  | 4.3037469  | -3.2037052 | 2.1676594  |
| H  | -3.0700820 | 5.1907058  | -1.6147077 | H  | 0.9682869  | 3.1615362  | -4.8676190 |
| H  | -4.7241666 | 3.4020207  | -1.2134209 | H  | 1.5094969  | 4.1106262  | -3.4823992 |
| C  | -4.1204791 | 0.7884623  | -0.3991054 | H  | -0.0571423 | 3.2908006  | -3.4305156 |
| C  | -5.4986766 | 0.7301246  | -0.6060189 | H  | 1.7822333  | -4.0315019 | 3.7012413  |
| C  | -3.4397683 | -0.3359022 | 0.1040249  | H  | 2.1829480  | -4.5013070 | 2.0489991  |
| C  | -6.1907054 | -0.4490009 | -0.3394925 | H  | 0.6149444  | -3.7675488 | 2.3965964  |
| H  | -6.0321291 | 1.5918139  | -0.9906851 | H  | 3.6620913  | 0.2085534  | -3.6590457 |
| C  | -4.1321564 | -1.5133280 | 0.3498169  | H  | 3.5987776  | 0.9531138  | -3.4374583 |
| C  | -5.5111155 | -1.5691475 | 0.1269001  | H  | 2.9452932  | 1.6724298  | -4.9070977 |
| H  | -7.2602562 | -0.4951404 | -0.5070604 | H  | -1.0503329 | -4.1341807 | -2.3778665 |
| H  | -3.6245679 | -2.3994237 | 0.7105044  | H  | -0.8370713 | -4.2515057 | -0.6323191 |
| H  | -6.0494350 | -2.4881194 | 0.3275079  | H  | -1.8303161 | -2.9549526 | -1.3119004 |
| Au | -1.4137633 | -0.1174891 | 0.2505903  | F  | -2.6773462 | -0.9912588 | 6.0029423  |
| N  | 1.4090705  | -0.0205008 | -1.0434164 | F  | -5.0930076 | 0.2389653  | 5.8334760  |
| C  | 2.7684539  | 0.0688701  | -0.7826496 | F  | -3.2159550 | 0.6802362  | 3.9401456  |
| C  | 0.6959709  | 0.0256231  | 0.1110403  | F  | -5.3966590 | -0.7444906 | 3.3653276  |
| C  | 2.9038855  | 0.1736298  | 0.5586419  | F  | -4.8373683 | -2.4249393 | 5.4015017  |
| H  | 3.5035951  | 0.0323462  | -1.5646619 | F  | -2.9693502 | -1.9676224 | 3.5405989  |
| N  | 1.6249793  | 0.1267594  | 1.0902419  | Sb | -4.0444599 | -0.8536214 | 4.6901179  |
| H  | 3.7736470  | 0.2743147  | 1.1819591  |    |            |            |            |
| H  | 0.1179498  | 2.4947035  | -0.6668913 |    |            |            |            |
| O  | -1.2009339 | -1.9151218 | 1.5076358  |    |            |            |            |
| H  | -0.3929439 | -1.7926599 | 2.0356215  |    |            |            |            |
| H  | -1.9183113 | -1.9037096 | 2.1808465  |    |            |            |            |
| C  | 1.3217832  | -0.0029795 | 2.4947690  |    |            |            |            |
| C  | 0.7370714  | 1.0781952  | 3.1659491  |    |            |            |            |
| C  | 0.4289200  | 0.8969665  | 4.5145526  |    |            |            |            |
| C  | 0.6943343  | -0.3059528 | 5.1543693  |    |            |            |            |
| C  | 1.2839412  | -1.3566329 | 4.4634558  |    |            |            |            |
| C  | 1.6175707  | -1.2341478 | 3.1128732  |    |            |            |            |
| C  | 0.4904128  | 2.4126633  | 2.4904269  |    |            |            |            |
| H  | -0.0252757 | 1.7097160  | 5.0672390  |    |            |            |            |
| H  | 0.4368376  | -0.4284268 | 6.1990015  |    |            |            |            |
| H  | 1.4895012  | -2.2861764 | 4.9786027  |    |            |            |            |
| C  | 2.3130083  | -2.3759828 | 2.3822938  |    |            |            |            |
| C  | 0.8167658  | -0.2830847 | -2.3340911 |    |            |            |            |
| C  | 0.8757508  | 0.6995614  | -3.3322635 |    |            |            |            |
| C  | 0.2262434  | 0.4249623  | -4.5374788 |    |            |            |            |
| C  | -0.4322240 | -0.7795982 | -4.7396125 |    |            |            |            |
| C  | -0.4244806 | -1.7544243 | -3.7516624 |    |            |            |            |
| C  | 0.2093753  | -1.5360177 | -2.5286737 |    |            |            |            |
| C  | 1.6723432  | 1.9810302  | -3.1750255 |    |            |            |            |
| H  | 0.2365414  | 1.1675386  | -5.3252414 |    |            |            |            |
| H  | -0.9403375 | -0.9677491 | -5.6777453 |    |            |            |            |
| H  | -0.9109041 | -2.7032477 | -3.9342533 |    |            |            |            |
| C  | 0.3189048  | -2.6652118 | -1.5185320 |    |            |            |            |
| C  | 3.0573941  | 1.8145666  | -3.8291559 |    |            |            |            |
| H  | 1.8192219  | 2.1663062  | -2.1085747 |    |            |            |            |
| C  | 0.9722931  | 3.2062641  | -3.7765152 |    |            |            |            |
| H  | 2.2425428  | -2.1879217 | 1.3096548  |    |            |            |            |
| C  | 3.8047555  | -2.4313738 | 2.7561876  |    |            |            |            |
| C  | 1.6764385  | -3.7460178 | 2.6525284  |    |            |            |            |
| C  | -0.9343482 | 2.9294785  | 2.7197502  |    |            |            |            |
| H  | 0.6225213  | 2.2754590  | 1.4185102  |    |            |            |            |
| C  | 1.5323107  | 3.4438744  | 2.9502082  |    |            |            |            |
| C  | 1.5731345  | -3.5033560 | -1.8167057 |    |            |            |            |
| H  | 0.4548867  | -2.2368228 | -0.5263097 |    |            |            |            |
| C  | -0.9282114 | -3.5498073 | -1.4633348 |    |            |            |            |
| H  | 1.5047320  | -3.9556242 | -2.8092401 |    |            |            |            |
| H  | 1.6711424  | -4.3028645 | -1.0789690 |    |            |            |            |
| H  | 2.4750709  | -2.8887565 | -1.7802250 |    |            |            |            |
